# Supplementary material for: Stereoselective synthesis of natural product inspired carbohydrate fused pyrano[3,2-c]quinolones as antiproliferative agents
Source: Royal Society of Chemistry journal article supplement (doi:10.1039/c7ob03186f), 2018-01-01

## *Supplementary material*

### **Stereoselective synthesis of natural product inspired carbohydrate fused pyrano[3,2-c]quinolones as antiproliferative agents**

**Priti Kumari,<sup>a</sup> Chintam Narayana,<sup>a</sup> Shraddha Dubey,<sup>b</sup> Ashish Gupta<sup>\*b</sup> and Ram Sagar<sup>\*a,c</sup>**

<sup>a</sup>Department of Chemistry, School of Natural Sciences, Shiv Nadar University (SNU), NH91, Tehsil-Dadri, Gautam Buddha Nagar, Uttar Pradesh, 201314, India.

<sup>b</sup>Department of Life Sciences, School of Natural Sciences, Shiv Nadar University (SNU), NH91, Tehsil-Dadri, Gautam Buddha Nagar, Uttar Pradesh, 201314, India.

<sup>c</sup>Department of Chemistry, Institute of Science, Banaras Hindu University, Varanasi, Uttar Pradesh, 221005, India.

\*E-mail (Corresponding author): [ram.sagar@snu.edu.in](mailto:ram.sagar@snu.edu.in); [ashish.gupta@snu.edu.in](mailto:ashish.gupta@snu.edu.in).

| <b>S. No.</b> | <b>Contents</b>                                                                                                    | <b>Page No.</b> |
|---------------|--------------------------------------------------------------------------------------------------------------------|-----------------|
| 1             | Synthesis of Compound <b>1a</b> and <b>1b</b>                                                                      | S2              |
| 2             | Synthesis and NMR data of 4-hydroxyquinolones <b>1-11</b>                                                          | S2-S6           |
| 3             | Copies of <sup>1</sup> H NMR and <sup>13</sup> C NMR of pyrano[3,2-c]quinolones <b>12-33a/b</b>                    | S7-S28          |
| 4             | NOE, <sup>1</sup> H- <sup>1</sup> H COSY and <sup>1</sup> H- <sup>13</sup> C HSQC spectra of compound <b>12</b>    | S29-S30         |
| 5             | Copies of <sup>1</sup> H & <sup>13</sup> C NMR of <b>34</b> and <i>N</i> -methyl pyrano[3,2-c]quinolones <b>35</b> | S31-S32         |
| 6             | Cell viability data for all compounds against MCF-7 and HepG2 cell lines                                           | S33-S34         |

## General experimental procedures

**Synthesis of 2-C-formyl galactal **1a** and 2-C-formyl glucal **1b**:** In a 100 ml round bottom flask 30 ml anhydrous DMF was added followed by dropwise addition of  $\text{POCl}_3$  (0.6 mL, 21.6 mmol) at 0 °C and resulting mixture was stirred for 30 min under Argon atmosphere. A solution (dissolved in anhydrous DMF) of 3,4,6-tri-*O*-benzyl-D-galactal (2.99 g, 7.20 mmol) was added to this dropwise within 30 min. The resulting reaction mixture was stirred at 0 °C to room temperature for 5 h which shows disappearance of starting material (TLC). Reaction mixture was quenched by slow addition of (within 30 min) of chilled  $\text{NaHCO}_3$  (30 mL) solution at 0 °C. Mixture was extracted with ethyl acetate ( $3 \times 30\text{mL}$ ), and combined organic layer washed with brine solution ( $3 \times 30\text{mL}$ ), then dried over anhydrous  $\text{Na}_2\text{SO}_4$ . The combined organic layer was evaporated under vacuum to get crude residue which was purified through flash column chromatography and pure 2-C-formyl galactal **1a** was isolated in 94 % isolated yield (3.0 g). Similarly using 3,4,6-tri-*O*-benzyl-D-glucal and adopting above protocol 2-C-formyl glucal **1b** was obtained in 54 % (1.7g) isolated yield.<sup>1</sup>

**Synthesis of 4-hydroxyquinolones **1-11**:** In an oven dried 25 ml round bottom flask Aniline (1 mL, 1.024 gm 10.99 mmol) and Meldrum's Acid (1.583 gm, 10.99 mmol) were taken and heated at 80 °C for 2 h. After consumption of starting material (TLC), added ethyl acetate and aqueous solution of sodium bicarbonate. Resulting suspension partitioned in separating funnel and aqueous layer washed with ethyl acetate ( $3 \times 50\text{ mL}$ ). The aqueous layer acidified with conc. HCl until pH 1-2 then extracted with dichloromethane ( $3 \times 35\text{ mL}$ ). The combined organic layer dried over anhydrous  $\text{Na}_2\text{SO}_4$  filtered and evaporated on rotary evaporator to get solid residue which was forwarded next step without further purification. The solid residue (1.9 g) and Eaton's reagent (9.5 g, 5 equiv/w) was heated at 80 °C for 1 h or till disappearance of starting material (TLC). The reaction mixture cooled down and added ice cold water and keep stirring for 30 min then solid precipitate appeared which was filtered using Buchner funnel under vacuum till dryness to get almost pure 4-hydroxyquinolone **1** in 80 % yield (1.41gm).<sup>2</sup> Similar reaction protocol was followed for preparation of various other 4-hydroxyquinolone (**2-11** and **34**) using corresponding anilines (Table S1).

---

## References

1. N.G. Ramesh, K.K. Balasubramanian, *Tetrahedron Lett.* 1991, 32, 3875-3878.
2. (a) S-J. Park, J-C Lee, K-I. Lee. *Bull. Korean Chem. Soc.* 2007, **28**, 1203-1205, (b) K. Arya, M. Agarwal, *Bioorg. Med. Chem. Lett.* 2007, **17**, 86-93.

**Table S1.** Synthesis of 4-hydroxyquinolone **1-11**.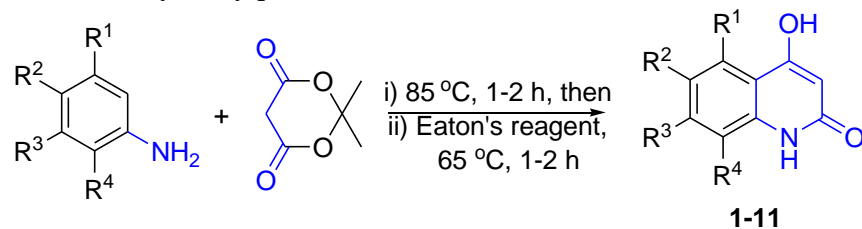

| Entry          | R <sup>1</sup> | R <sup>2</sup> | R <sup>3</sup>  | R <sup>4</sup>    | Product   | Time (h) | Yield (%) |
|----------------|----------------|----------------|-----------------|-------------------|-----------|----------|-----------|
| 1              | H              | H              | H               | H                 | <b>1</b>  | 1        | 80        |
| 2              | H              | H              | H               | F                 | <b>2</b>  | 2        | 70        |
| 3              | H              | H              | OPh             | H                 | <b>3</b>  | 2        | 69        |
| 4              | H              | H              | H               | NO <sub>2</sub>   | <b>4</b>  | 1        | 53        |
| 5              | H              | H              | H               | OCF <sub>3</sub>  | <b>5</b>  | 2        | 81        |
| 6 <sup>a</sup> | H              | H-             | CF <sub>3</sub> | H                 | <b>6</b>  | 1        | 55        |
| 7              | H              | H              | H               | CHMe <sub>2</sub> | <b>7</b>  | 2        | 70        |
| 8 <sup>a</sup> | H              | H              | Cl              | H                 | <b>8</b>  | 1        | 60        |
| 9 <sup>a</sup> | H              | H              | Br              | H                 | <b>9</b>  | 2        | 65        |
| 10             | H              | H              | H               | CF <sub>3</sub>   | <b>10</b> | 1        | 58        |
| 11             | H              | Cl             | CF <sub>3</sub> | H                 | <b>11</b> | 2        | 51        |

<sup>a</sup>Two regioisomers were formed in these cases, they were purified and isolated yields of desired isomer is given.

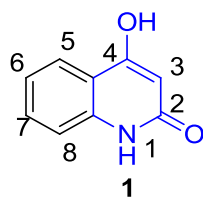

**4-hydroxyquinolin-2(1H)-one (1).** <sup>1</sup>H NMR (400 MHz, DMSO-*d*<sub>6</sub>): δ 11.31 (brs, 1H, OH), 11.20 (s, 1H, NH), 7.76 (dd, *J* = 1.2 Hz, *J* = 8.0 Hz, 1H, H-5), 7.47-7.45 (t, *J* = 7.2 Hz, 1H, H-6), 7.25 (d, *J* = 8.0 Hz, 1H, H-8), 7.14 (t, *J* = 7.2 Hz, 1H, H-7), 5.72 (s, 1H, H-3). <sup>13</sup>C NMR (100 MHz, DMSO-*d*<sub>6</sub>): δ: 163.9, 162.8, 139.6, 131.3, 123.1, 121.4, 115.5, 115.4, 98.6 (C-3). HRMS(ESI), calcd, *m/z* C<sub>9</sub>H<sub>7</sub>NO<sub>2</sub>, [M+H]<sup>+</sup> 162.0549; Found: 162.0573.

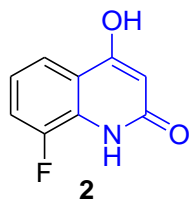

**8-Flouro-4-hydroxyquinolin-2(1H)-one (2).** <sup>1</sup>H NMR (400 MHz, DMSO-*d*<sub>6</sub>): δ 11.53 (brs, 1H, OH), 11.21 (s, 1H, NH), 7.61 (d, *J* = 8.0 Hz, 1H, H-5), 7.41 (ddd, *J* = 11.2 Hz, *J* = 8.0 Hz and *J* = 1.2 Hz, 1H, H-7), 7.13 (td, *J* = 4.8 Hz, *J* = 8.0 Hz, 1H, H-6), 5.79 (s, 1H, H-3). <sup>13</sup>C NMR (100

MHz, DMSO-*d*6):  $\delta$  163.5, 162.4, 121.3, 121.2, 118.9, 117.8, 116.5, 116.3, 99.6 (C-3). HRMS(ESI), calcd,  $m/z$  C<sub>9</sub>H<sub>6</sub>FNO<sub>2</sub>[M+H]<sup>+</sup> 180.0455; Found: 180.0479.

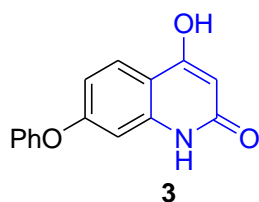

**7-phenoxy-4-hydroxyquinolin-2(1H)-one (3)** <sup>1</sup>H NMR (400 MHz, DMSO-*d*6): 11.44 (s, 1H, OH), 11.16 (s, 1H, NH), 7.78 (d,  $J$  = 9.2 Hz, 1H, H-5), 7.47-6.80 (m, 7H, ArH), 5.67 (s, 1H, H-3), <sup>13</sup>C NMR (100 MHz, DMSO-*d*6):  $\delta$  164.1, 163.0, 159.9, 141.2, 130.7, 130.1, 125.2, 117.3, 112.6, 103.1, HRMS(ESI), calcd,  $m/z$  C<sub>15</sub>H<sub>11</sub>NO<sub>3</sub>, [M+H]<sup>+</sup> 254.0817; Found: 254.0849

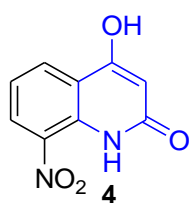

**8-Nitro-4-hydroxyquinolin-2(1H)-one (4)**. (400 MHz, DMSO-*d*6):  $\delta$  12.07(s, 1H, OH), 10.60(s, 1H, NH), 8.45(dd,  $J$  = 8.4 Hz and  $J$  = 1.2 Hz, 1H, H-5), 8.26 (dd,  $J$  = 8.0 Hz and  $J$  = 1.2 Hz, 1H, H-7), 7.37 (t,  $J$  = 8.0 Hz, 1H, H-6), 5.88 (s, 1H, H-3), <sup>13</sup>C NMR (100 MHz, DMSO-*d*6):  $\delta$  162.6, 133.9, 131.2, 128.8, 121.2, 118.4, 98.9 (C-3), HRMS(ESI), calcd,  $m/z$  C<sub>9</sub>H<sub>6</sub>N<sub>2</sub>O<sub>4</sub>, [M+H]<sup>+</sup> 207.0400; Found: 207.0432.

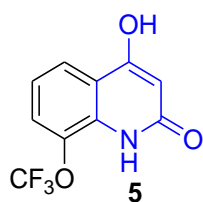

**8-trifluoromethoxy-4-hydroxy-2H-benzopyran-2-one (5)**. <sup>1</sup>H NMR (400 MHz, DMSO-*d*6):  $\delta$  11.62 (brs, 1H, OH), 11.37 (brs, 1H, NH), 7.81 (dd,  $J$  = 8.0 Hz and  $J$  = 1.6 Hz, 1H, H-5), 7.57 (dd,  $J$  = 8.0 Hz and  $J$  = 1.6 Hz, 1H, H-7), 7.21 (t,  $J$  = 8.0 Hz, 1H, H-6), 5.81 (s, 1H, H-3); <sup>13</sup>C NMR (100 MHz, DMSO-*d*6):  $\delta$  163.7, 162.2, 134.7, 132.6, 123.6, 122.4, 121.3, 117.8, 99.6 (C-3), HRMS(ESI), calcd,  $m/z$  C<sub>10</sub>H<sub>6</sub>F<sub>3</sub>NO<sub>3</sub>, [M+H]<sup>+</sup> 246.0373; Found: 246.0411.

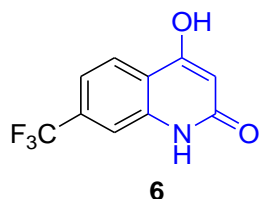

**7-trifluoromethyl-4-hydroxyquinolin-2(1H)-one (6).**  $^1\text{H}$  NMR (400 MHz, DMSO-*d*6):  $\delta$  11.61 (brs, 1H, OH), 11.48 (brs, 1H, NH), 7.98 (d,  $J$  = 8.4 Hz, 1H, H-5), 7.62 – 7.58(m, 1H), 7.45 (d,  $J$  = 8.4 Hz, 1H, H-6), 5.86 (s, 1H, H-3),  $^{13}\text{C}$  NMR (100 MHz, DMSO-*d*6):  $\delta$  163.7, 162.8, 162.0, 141.8, 139.4, 130.4, 124.7, 121.2, 112.4, 100.6 (C-3), HRMS(ESI), calcd,  $m/z$   $\text{C}_{10}\text{H}_6\text{F}_3\text{NO}_2$ ,  $[\text{M}+\text{H}]^+$  230.0423; Found: 230.0458.

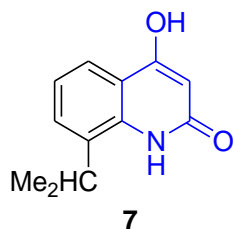

**8-isopropyl-4-hydroxyquinolin-2(1H)-one (7).**  $^1\text{H}$  NMR (400 MHz, DMSO-*d*6):  $\delta$  10.69 (brs, 1H, NH), 7.72 (dd,  $J$  = 8.0 Hz and  $J$  = 1.2 Hz, 1H, H-5), 7.50 (dd,  $J$  = 7.9 Hz and  $J$  = 1.4 Hz, 1H, H-7), 7.18 (t,  $J$  = 15.8 Hz, 1H, H-6), 5.86 (s, 1H, H-3), 3.60 (septate,  $J$  = 6.8 Hz, 1H, CH of  $\text{CHMe}_2$ ), 1.19 (d,  $J$  = 6.8 Hz, 6H,  $\text{CHMe}_2$ ),  $^{13}\text{C}$  NMR (100 MHz, DMSO-*d*6):  $\delta$  168.9, 168.8, 141.2, 139.2, 132.8, 126.7, 125.7, 120.7, 102.3 (C-3), 30.7 (CH), 28.2 ( $\text{Me}_2$ ), HRMS(ESI), calcd,  $m/z$   $\text{C}_{12}\text{H}_{13}\text{NO}_2$ ,  $[\text{M}+\text{H}]^+$  204.1019; Found: 204.1016.

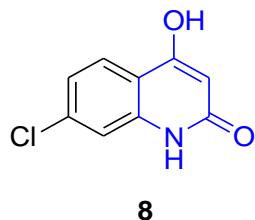

**7-chloro-4-hydroxyquinolin-2(1H)-one (8).**  $^1\text{H}$  NMR(400 MHz, DMSO-*d*6):  $\delta$  11.51 (brs, 1H, OH), 11.36 (brs, 1H, NH), 7.76 (d,  $J$  = 8.8 Hz, 1H, H-5), 7.41 (d,  $J$  = 8.0 Hz, 1H, H-6), 7.18-7.15 (m, 1H), 5.80 (s, 1H, H-3),  $^{13}\text{C}$  NMR (100 MHz, DMSO-*d*6):  $\delta$  163.9, 162.9, 142.2, 135.7, 131.3, 130.3, 125.1, 121.7, 115.4, 112.5, 100.2 (C-3), HRMS(ESI), calcd,  $m/z$   $\text{C}_9\text{H}_6\text{ClNO}_2$ ,  $[\text{M}+\text{H}]^+$  196.0159; Found: 196.0170.

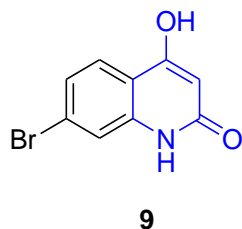

**7-bromo-4-hydroxyquinolin-2(1H)-one (9).**  $^1\text{H}$  NMR (400 MHz, DMSO-*d*6):  $\delta$  11.51 (brs, 1H, OH), 11.28 (brs, 1H, NH), 7.70 (d,  $J$  = 8.8 Hz, 1H, H-5), 7.43 (d,  $J$  = 8.0 Hz, 1H, H-6), 7.18-7.15 (m, 1H), 5.80 (s, 1H, H-3),  $^{13}\text{C}$  NMR (100 MHz, DMSO-*d*6):  $\delta$  163.8, 162.7, 142.3, 131.5,

128.6, 125.1, 117.7, 114.6, 100.3 (C-3), HRMS(ESI), calcd, m/z C<sub>9</sub>H<sub>6</sub>BrNO<sub>2</sub>, [M+K]<sup>+</sup> 277.9219; Found: 277.0997.

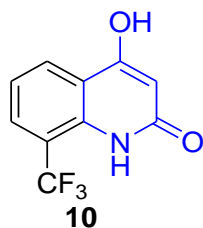

**8-trifluoromethyl-4-hydroxyquinolin-2(1H)-one (10).** <sup>1</sup>H NMR (400 MHz, DMSO-*d*<sub>6</sub>): δ 11.81 (brs, 1H, OH), 9.94 (brs, 1H, NH), 8.13 (d, *J* = 8.0 Hz, 1H, H-5), 7.90 (d, *J* = 8.0 Hz, 1H, H-7), 7.33 (t, *J* = 7.9 Hz, 1H, H-6), 5.88 (s, 1H, H-3). <sup>13</sup>C NMR (400 MHz, DMSO-*d*<sub>6</sub>): δ 169.9, 168.9, 163.5, 162.5, 141.2, 134.4, 131.5, 129.1, 128.3, 123.0, 121.3, 120.4, 100.1 (C-3), HRMS(ESI), calcd, m/z C<sub>10</sub>H<sub>6</sub>F<sub>3</sub>NO<sub>2</sub>, [M+H]<sup>+</sup> 230.0423; Found: 230.0458.

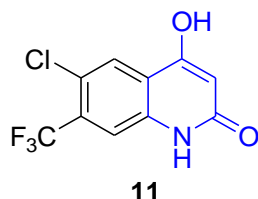

**6-chloro-7-trifluoromethyl-4-hydroxyquinolin-2(1H)-one (11).** <sup>1</sup>H NMR (400 MHz, DMSO-*d*<sub>6</sub>): δ 11.55 (s, 1H, OH), 7.93 (s, 1H, H-8), 7.71 (s, 1H, H-5), 5.86 (s, 1H, H-3); <sup>13</sup>C NMR (100 MHz, DMSO-*d*<sub>6</sub>): δ 168.2, 167.3, 165.7, 142.7, 130.5, 129.2, 128.8, 126.6, 123.9, 120.3, 106.2 (C-3), HRMS(ESI), calcd, m/z C<sub>10</sub>H<sub>5</sub>ClF<sub>3</sub>NO<sub>2</sub>, [M+H]<sup>+</sup> 264.0034; Found: 264.0037.

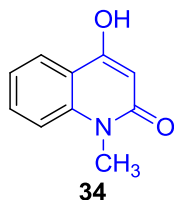

**4-hydroxy-1-methylquinolin-2(1H)-one (34).** <sup>1</sup>H NMR (400 MHz, DMSO-*d*<sub>6</sub>): δ 11.34 (s, 1H, OH), 7.89 (dd, *J* = 1.2 Hz, 1H, H-8), 7.61 (ddd, *J* = 1.2 Hz, *J* = 7.2 Hz, 1H, H-6), 7.46 (d, *J* = 8.4 Hz, 1H, H-5), 7.24 (td, *J* = 0.8 Hz, *J* = 8.0 Hz, 1H, H-7), 5.88 (s, 1H, H-3), 3.53 (s, 3H, N-CH<sub>3</sub>); <sup>13</sup>C NMR (100 MHz, DMSO-*d*<sub>6</sub>): δ 162.9, 161.4, 140.4, 131.7, 123.5, 121.6, 116.5, 114.9, 98.4, 28.8 (CH<sub>3</sub>); HRMS(ESI), calcd, m/z C<sub>10</sub>H<sub>9</sub>NO<sub>2</sub>, [M+H]<sup>+</sup> 176.07; Found: 176.0805.

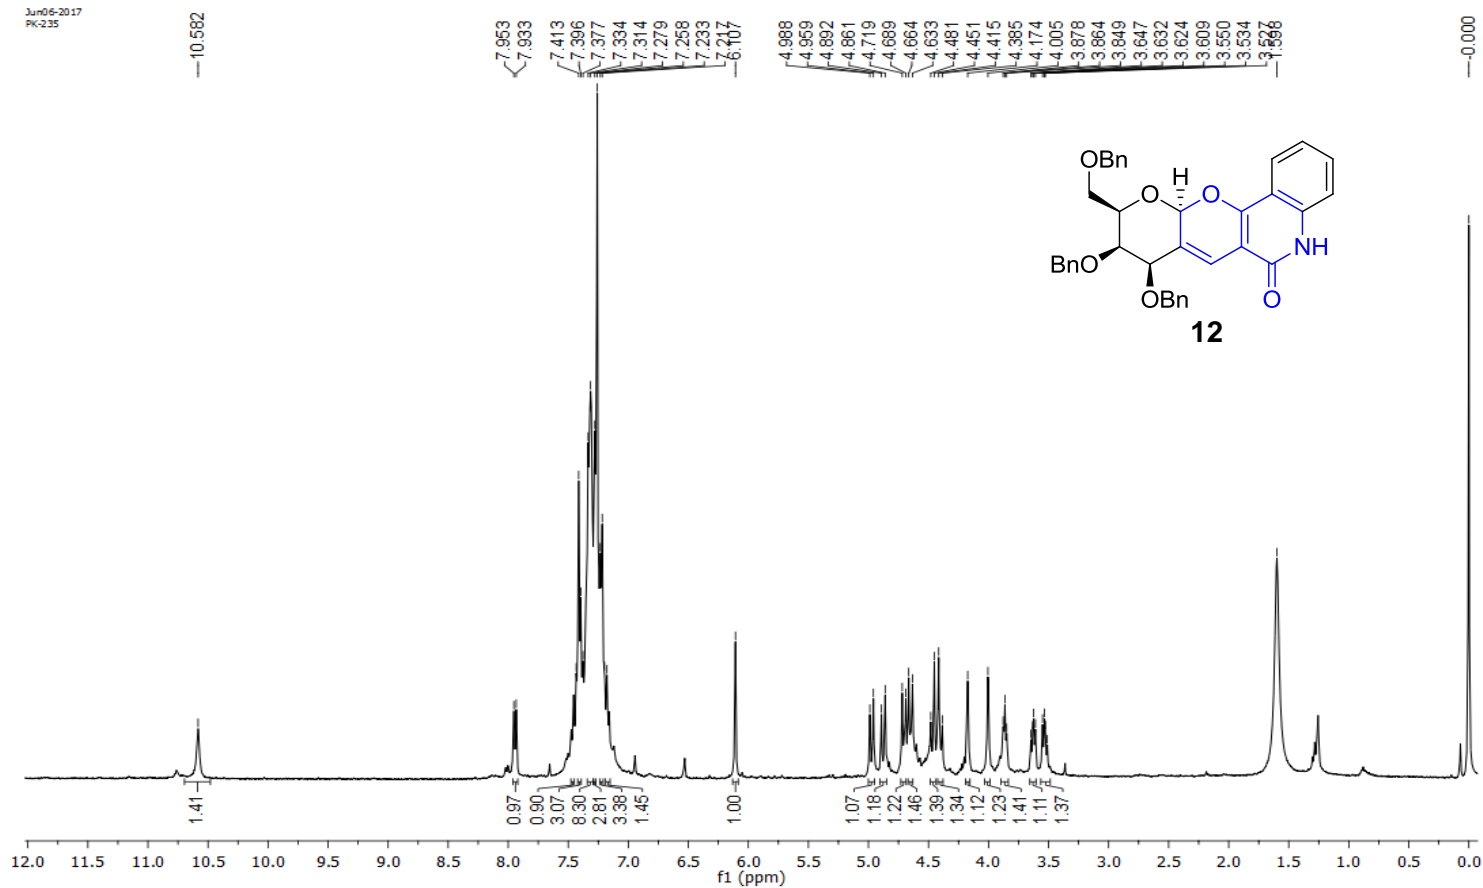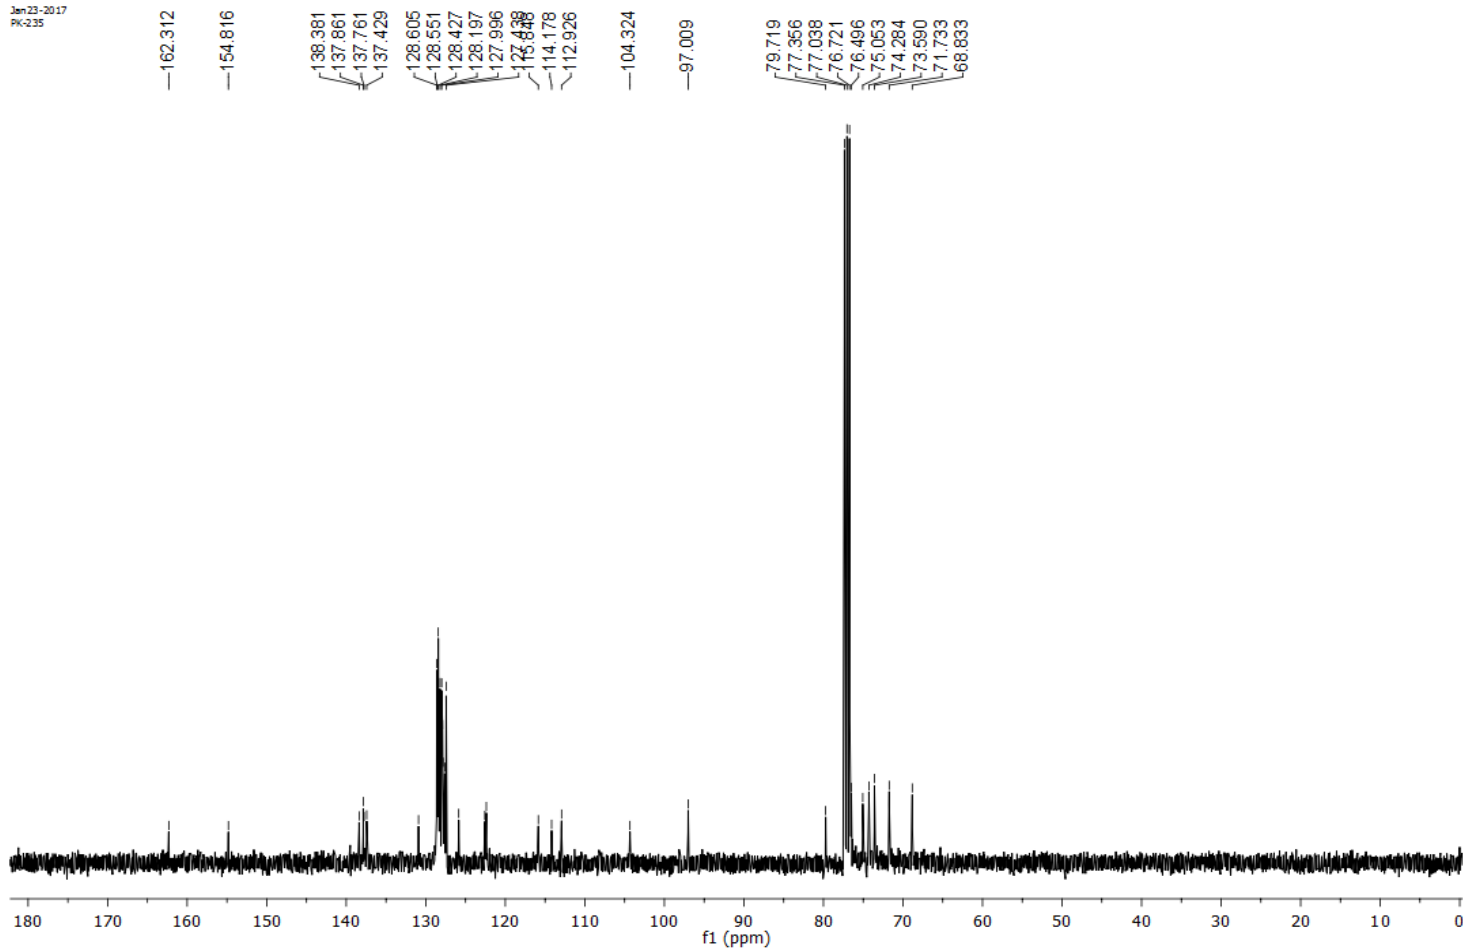

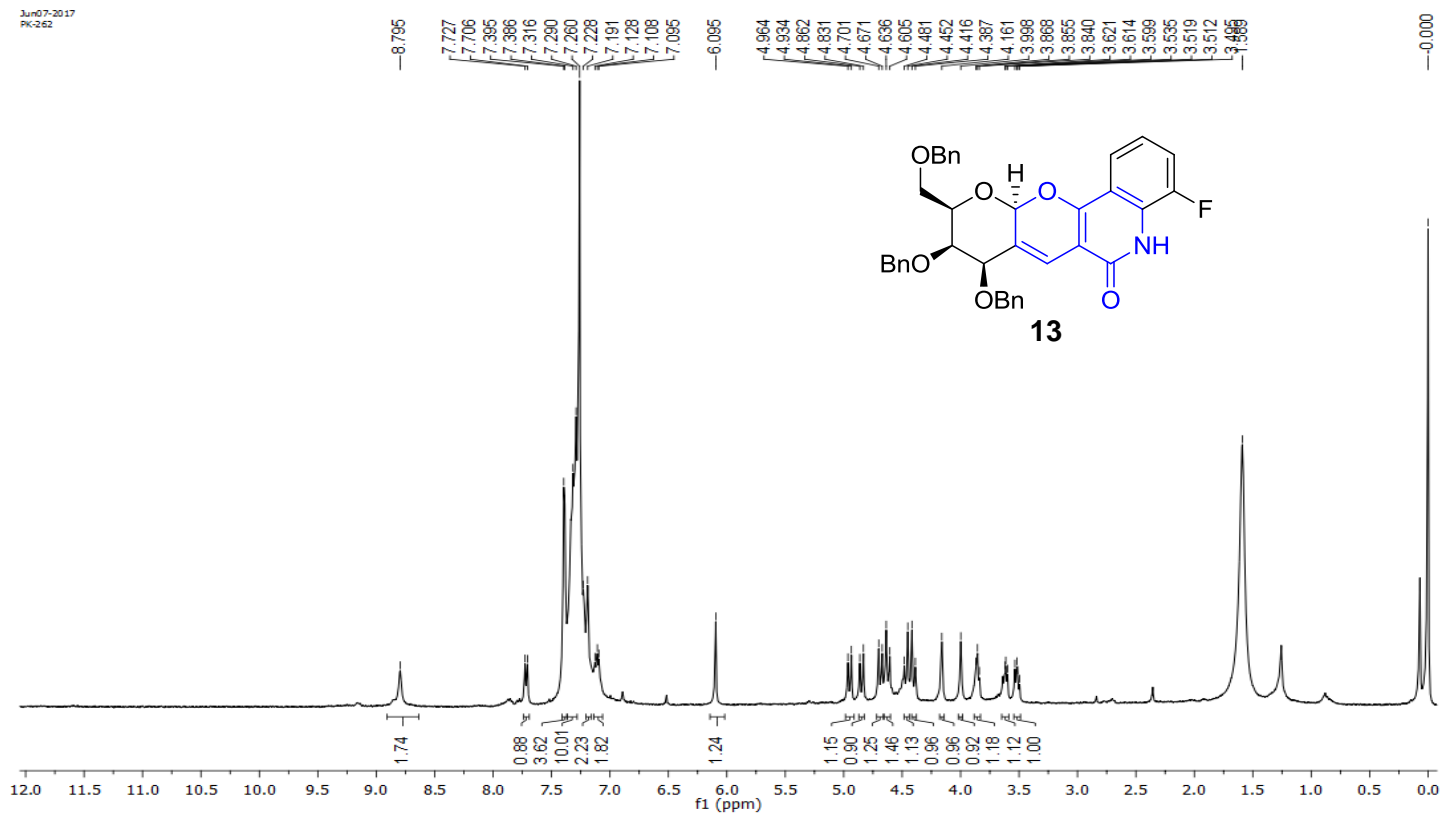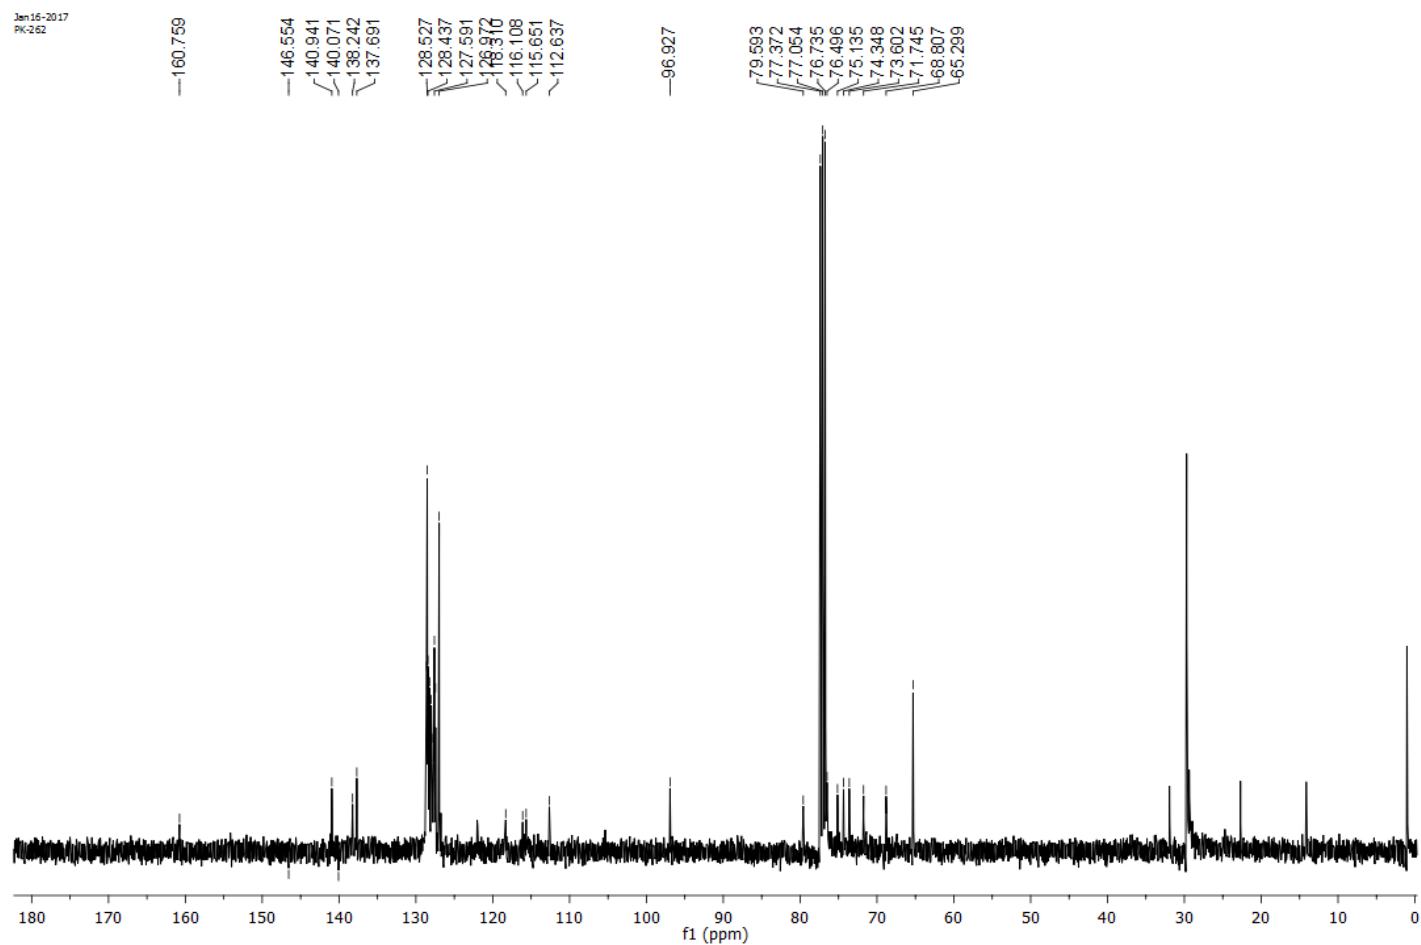



—10.184

7.888  
7.867  
7.396  
7.377  
7.303  
7.262  
7.155  
7.074  
7.057  
6.973  
4.980  
4.950  
4.876  
4.848  
4.718  
4.690  
4.645  
4.615  
4.476  
4.446  
4.409  
4.380  
4.156  
3.980  
3.857  
3.843  
3.831  
3.631  
3.616  
3.608  
3.597  
3.527  
3.510  
3.505

—0.000

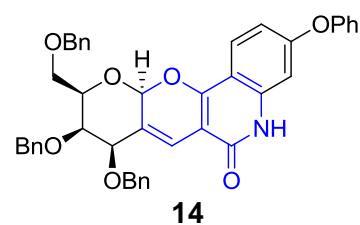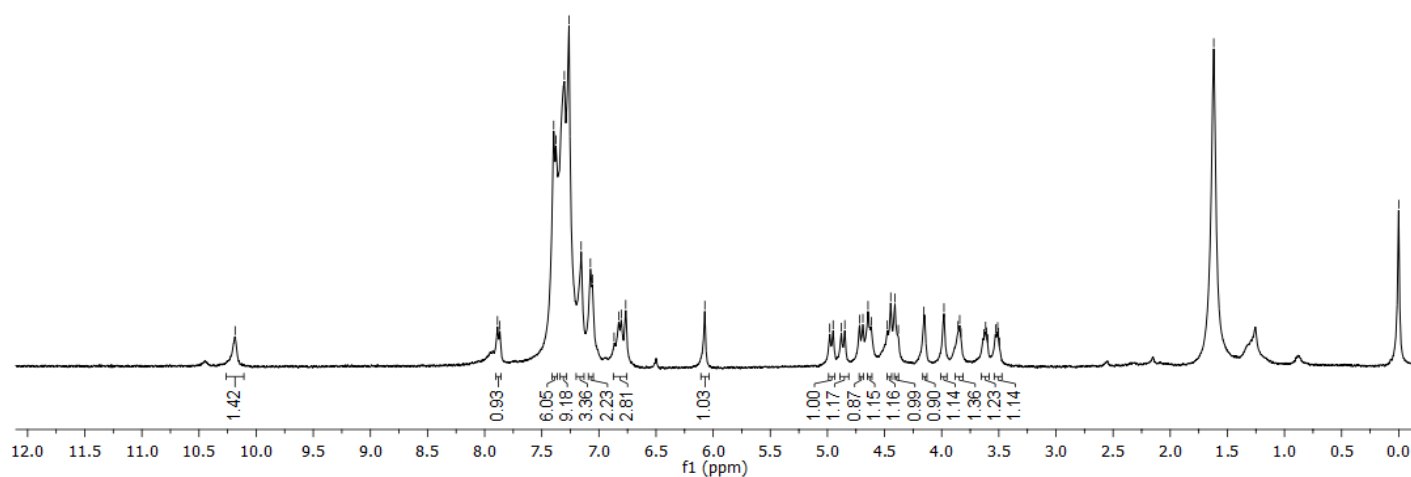

162.384  
160.187  
154.855  
139.036  
138.356  
137.836  
129.985  
128.602  
128.421  
128.197  
127.990  
127.888  
127.627  
127.428  
124.379  
109.880  
102.970  
97.001  
79.648  
77.350  
77.032  
76.715  
76.375  
75.053  
74.237  
73.585  
71.701  
68.873

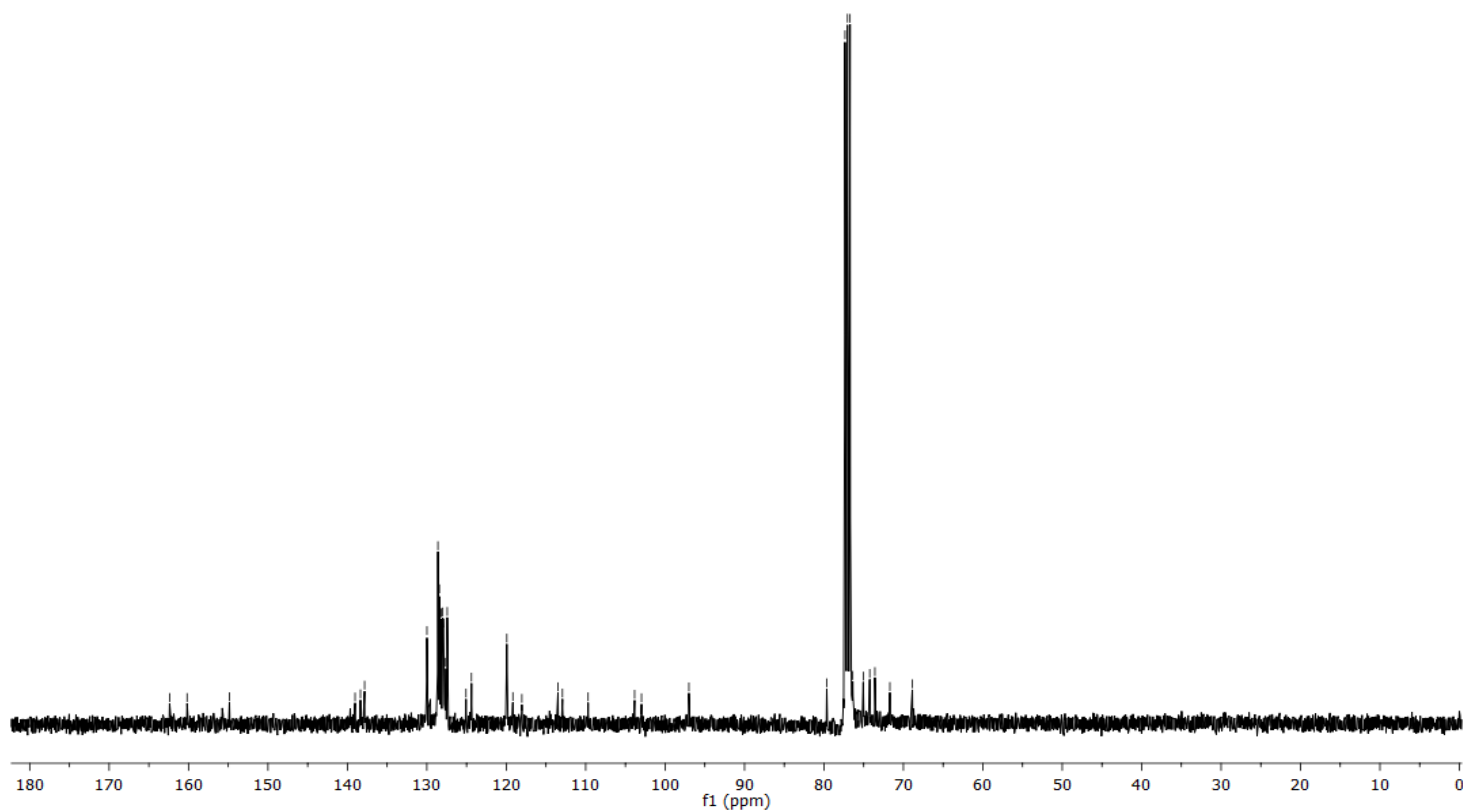

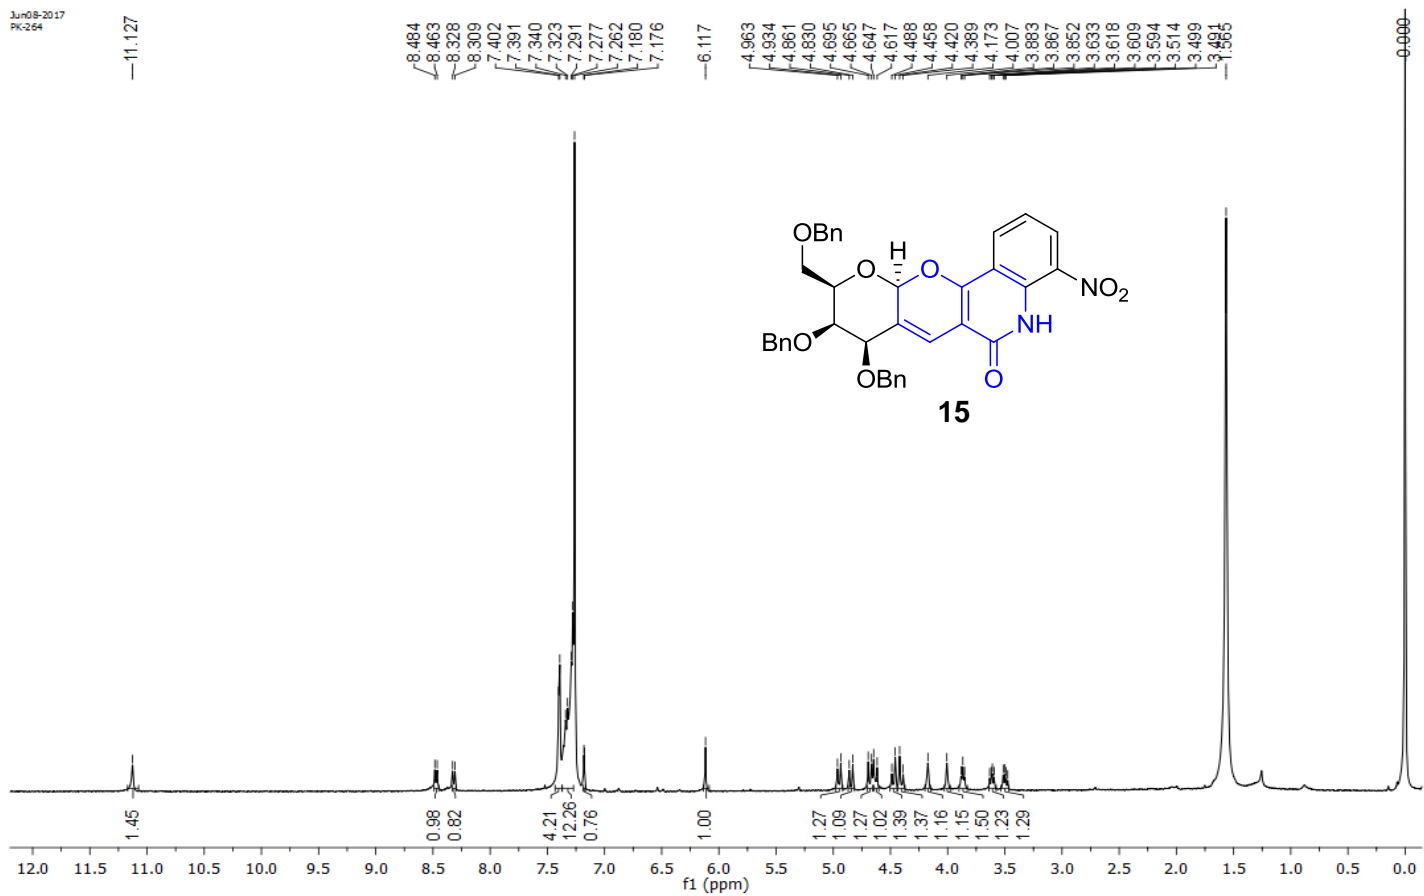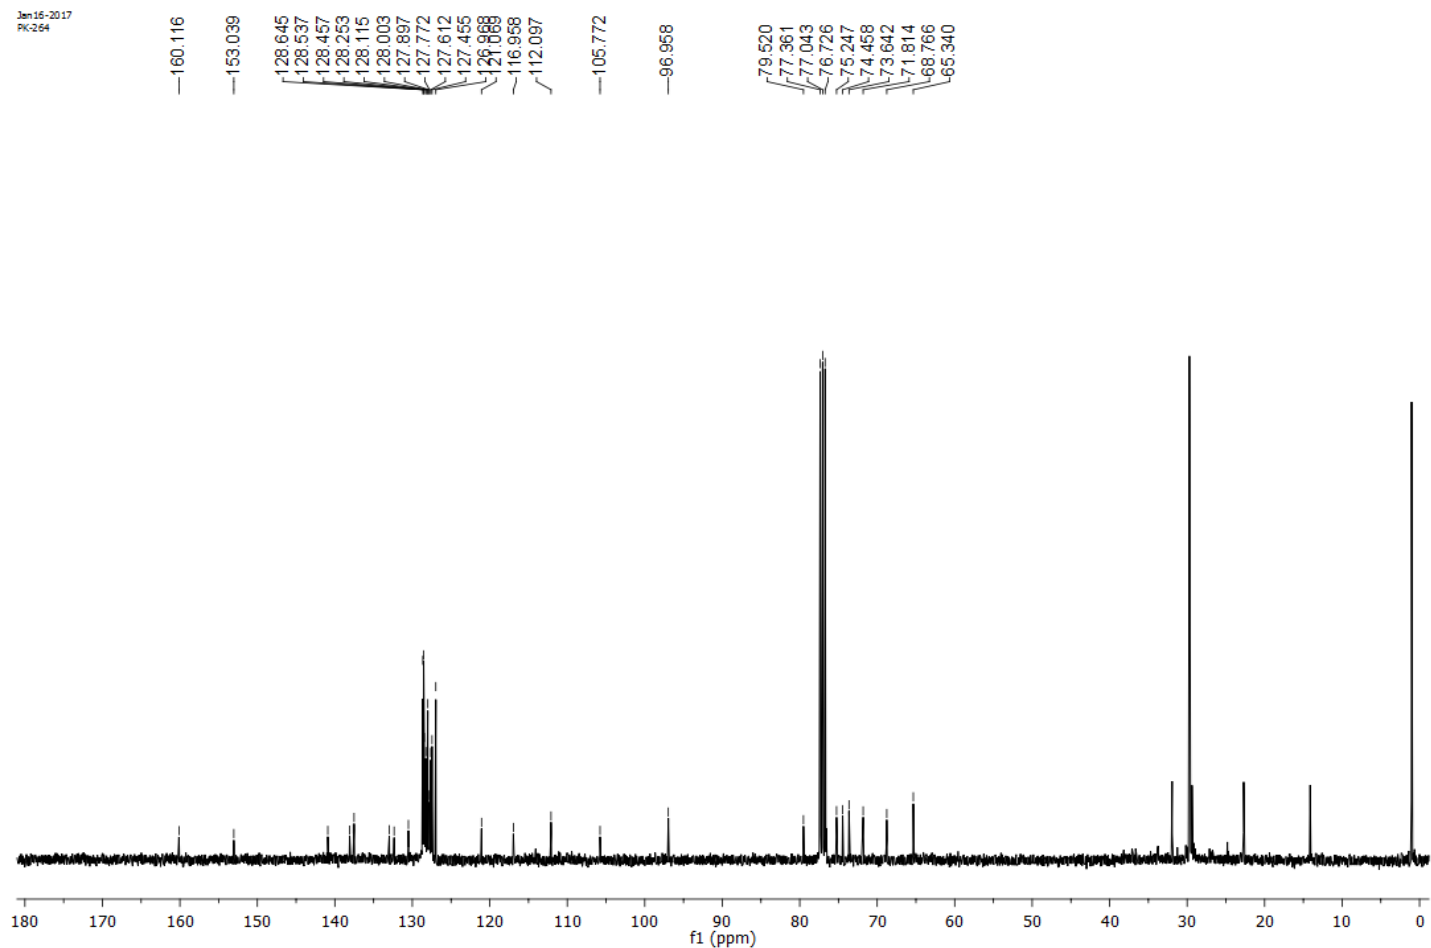

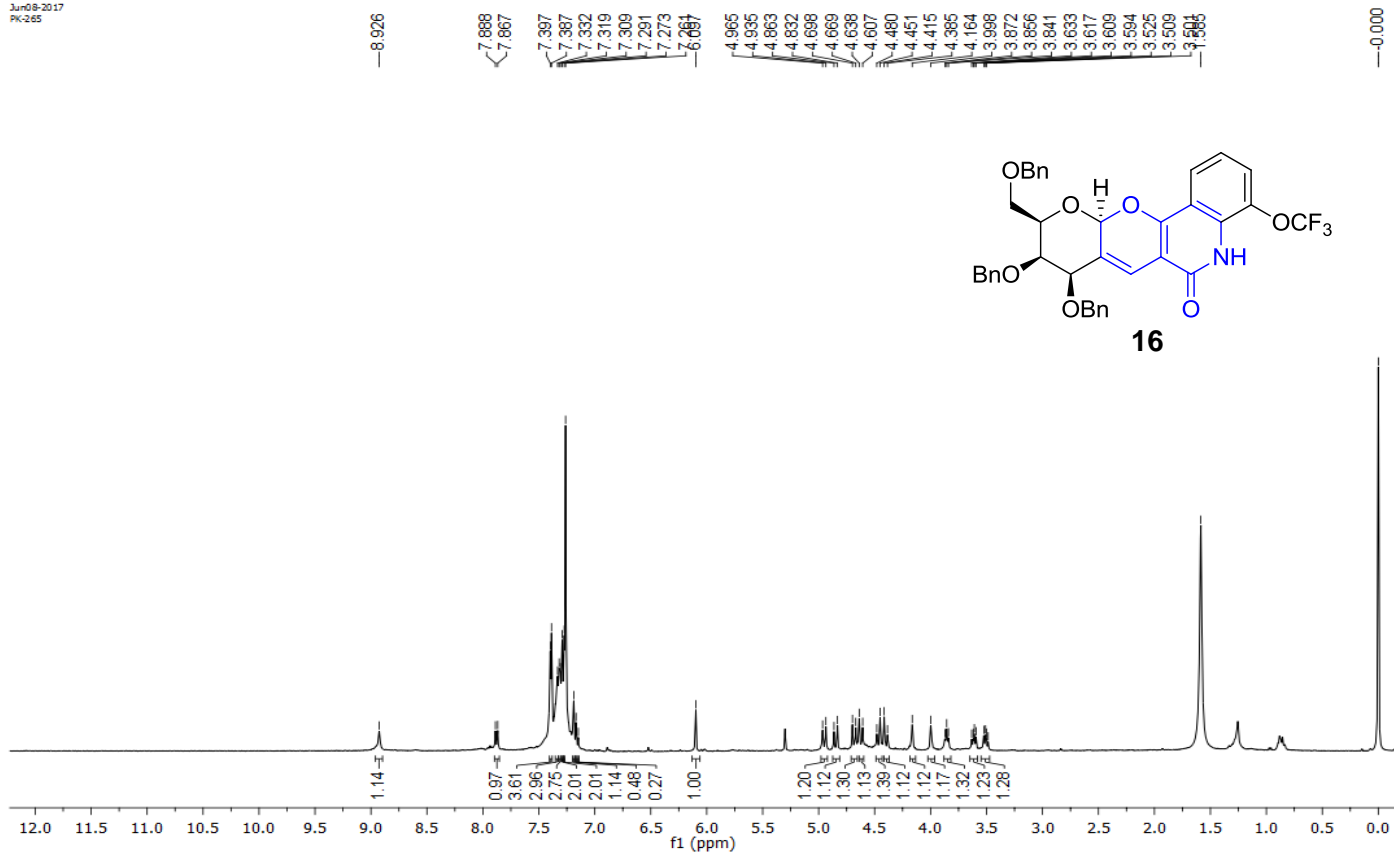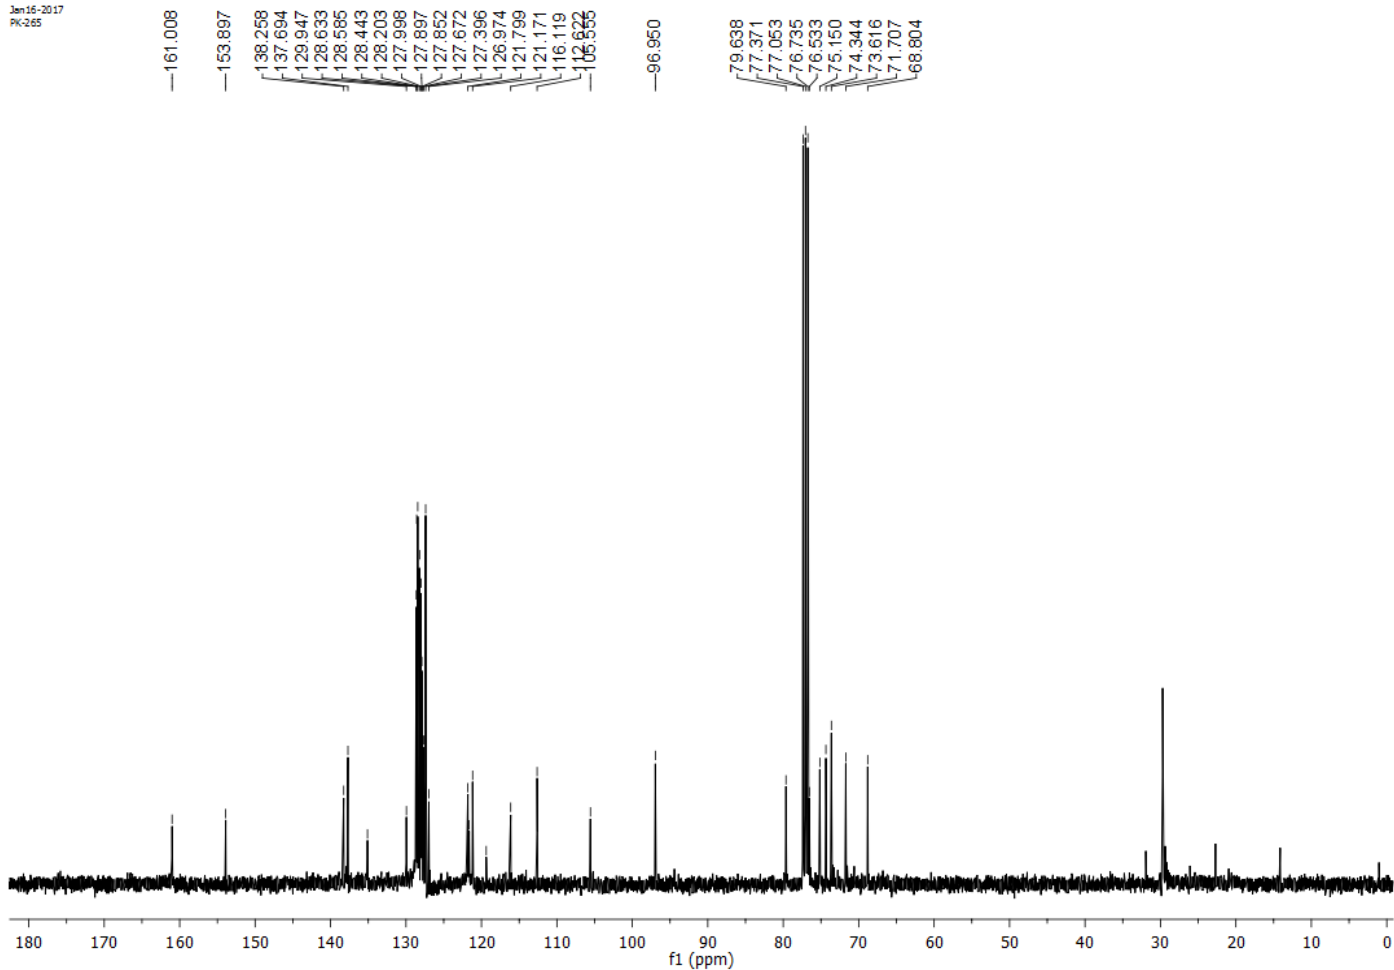

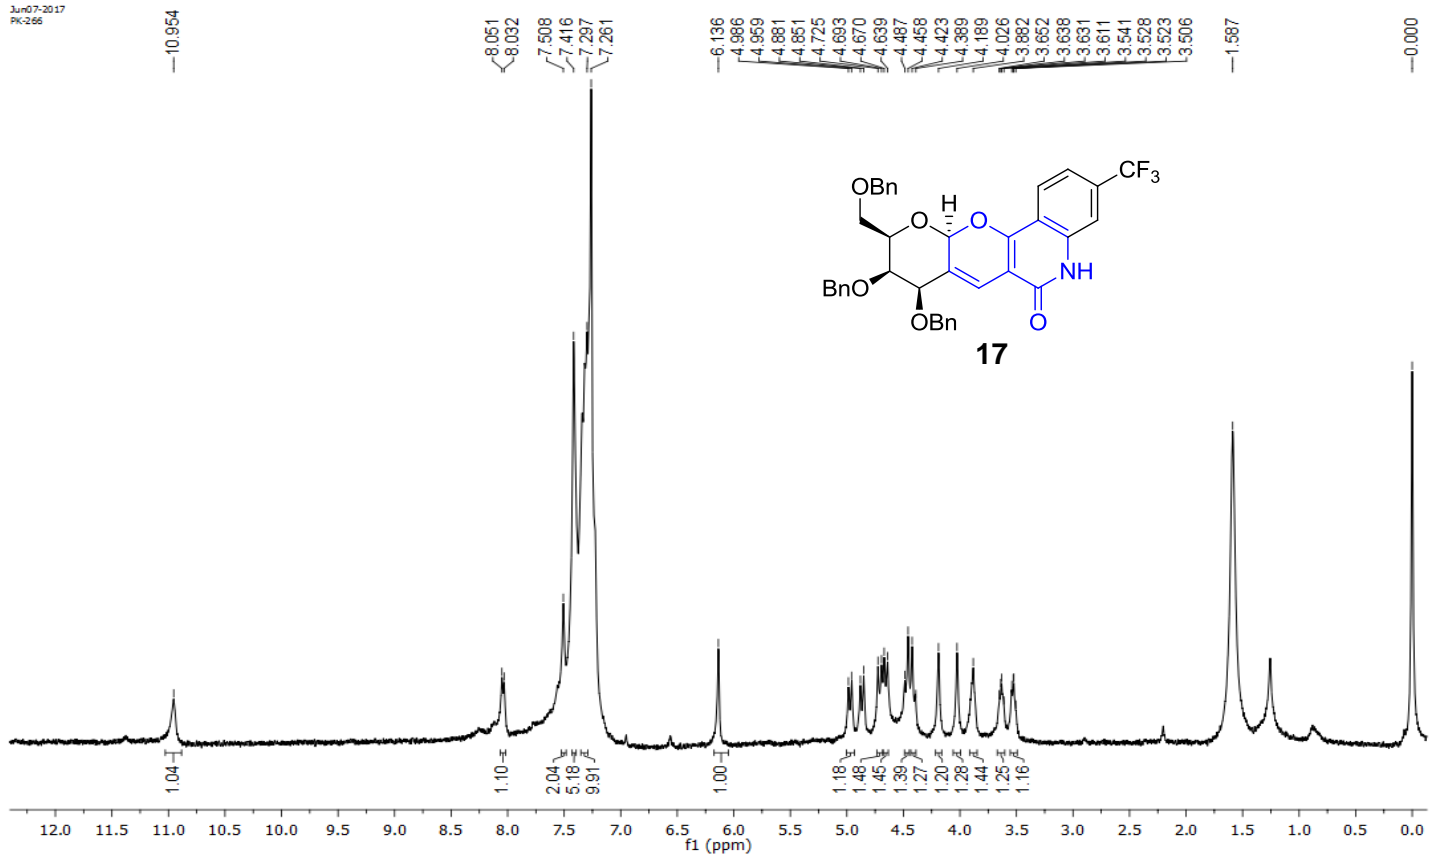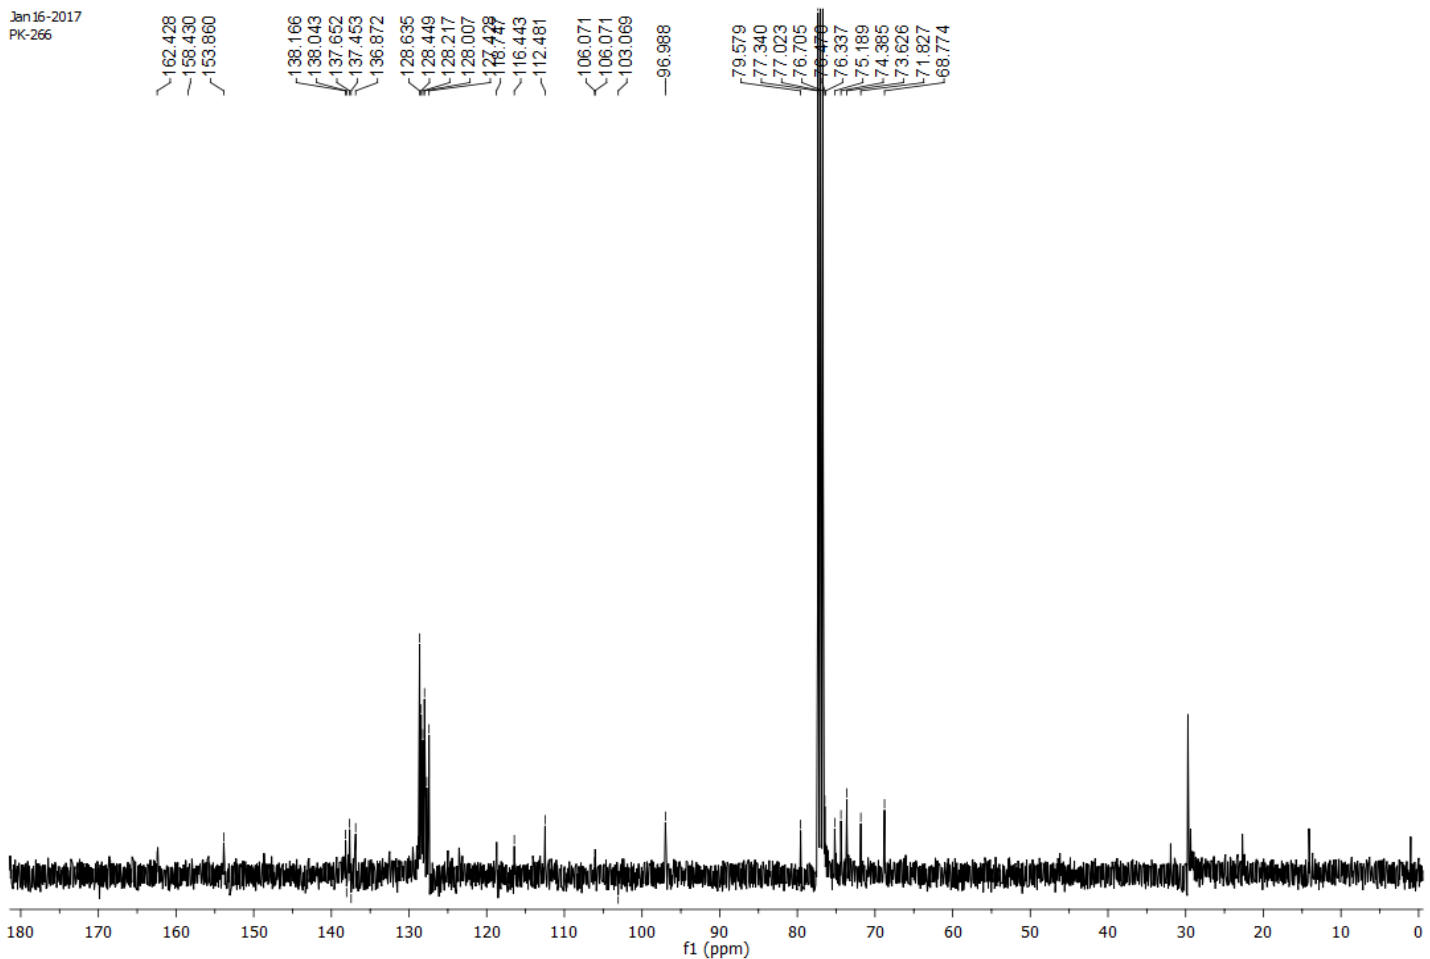

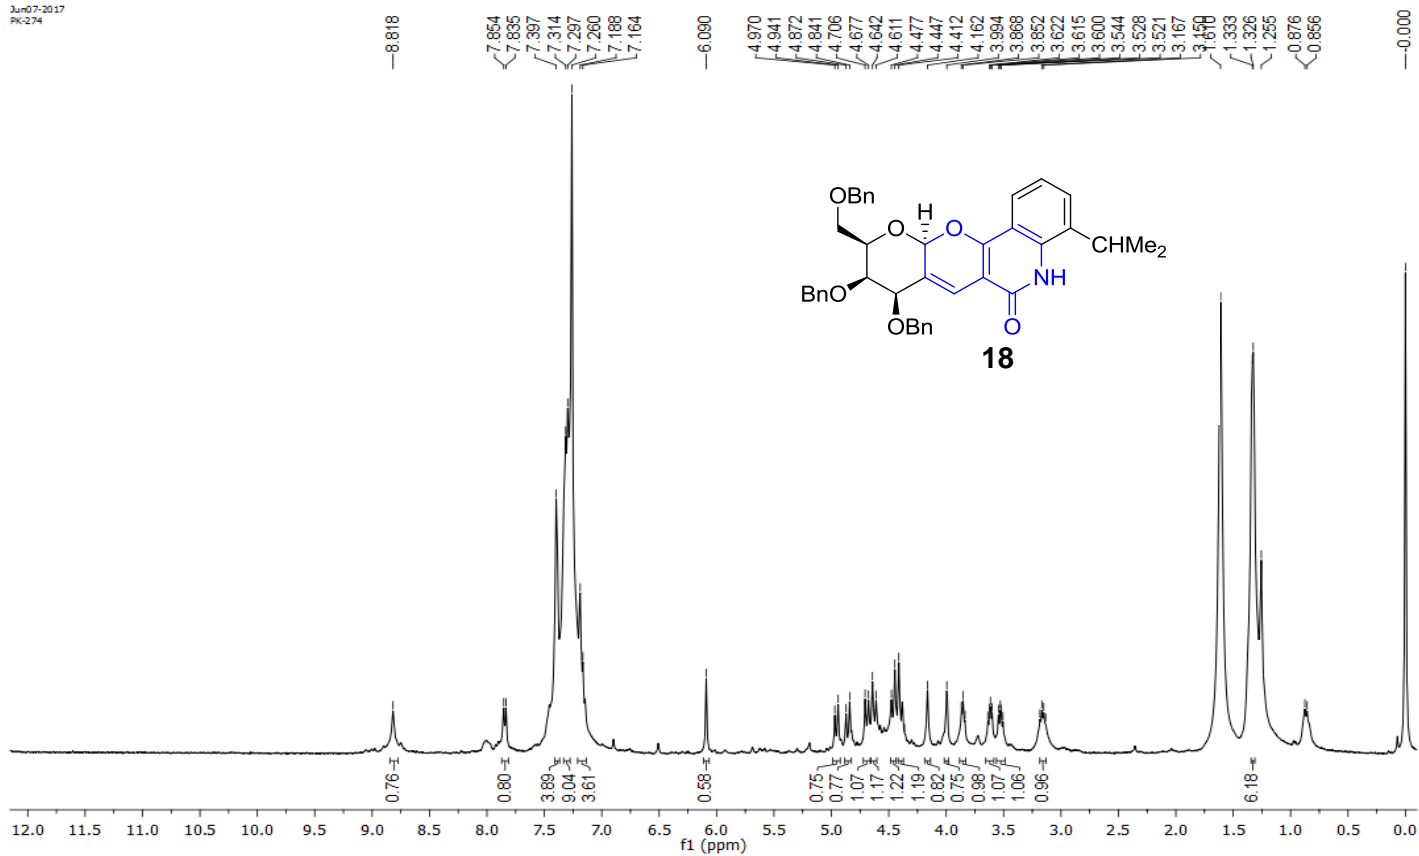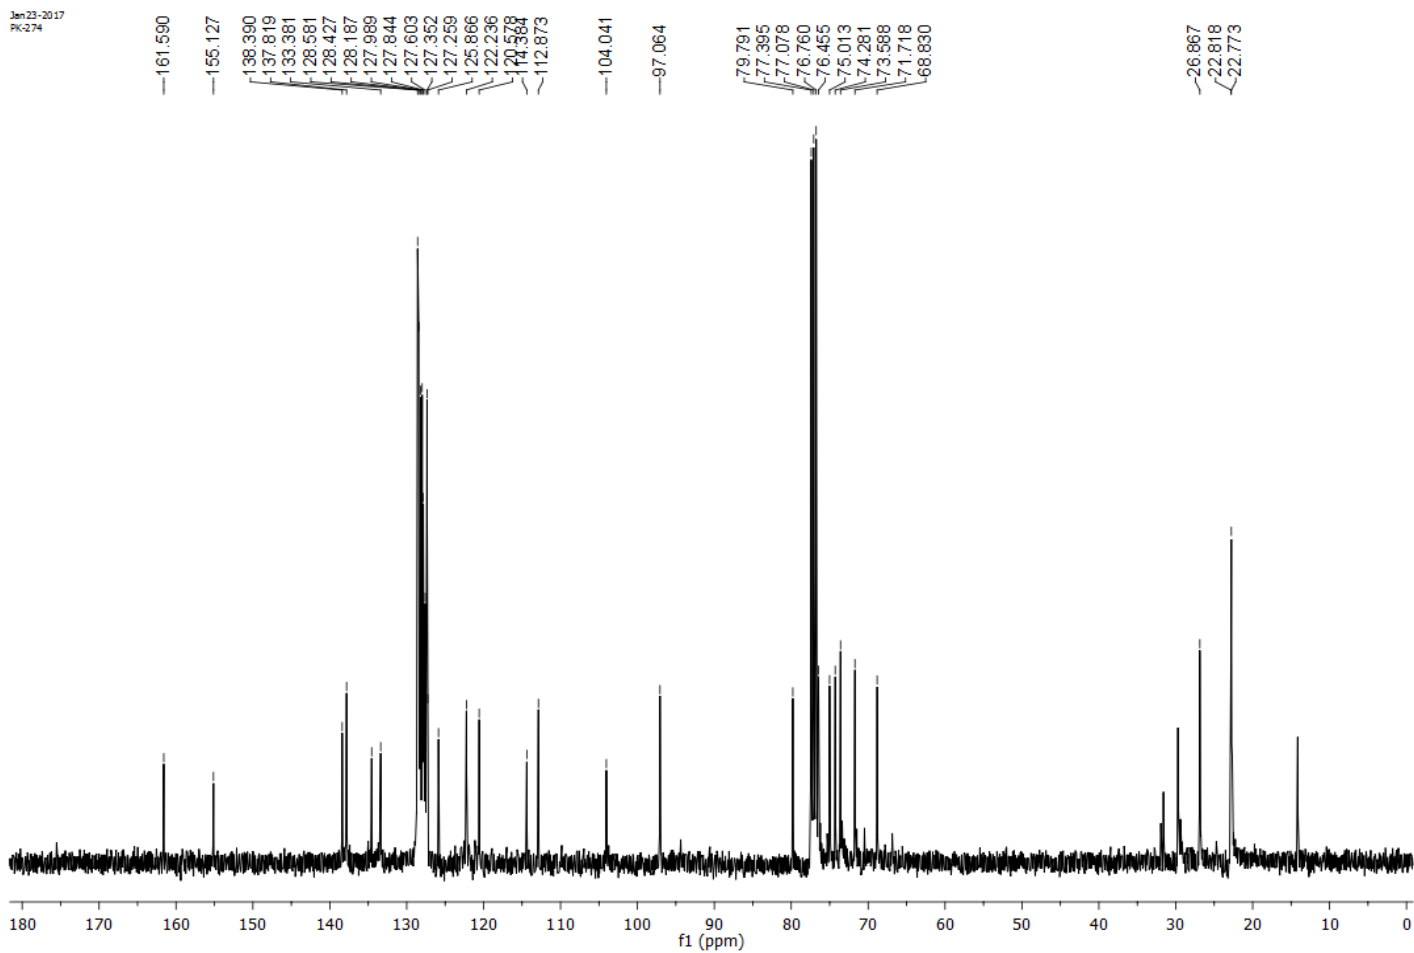

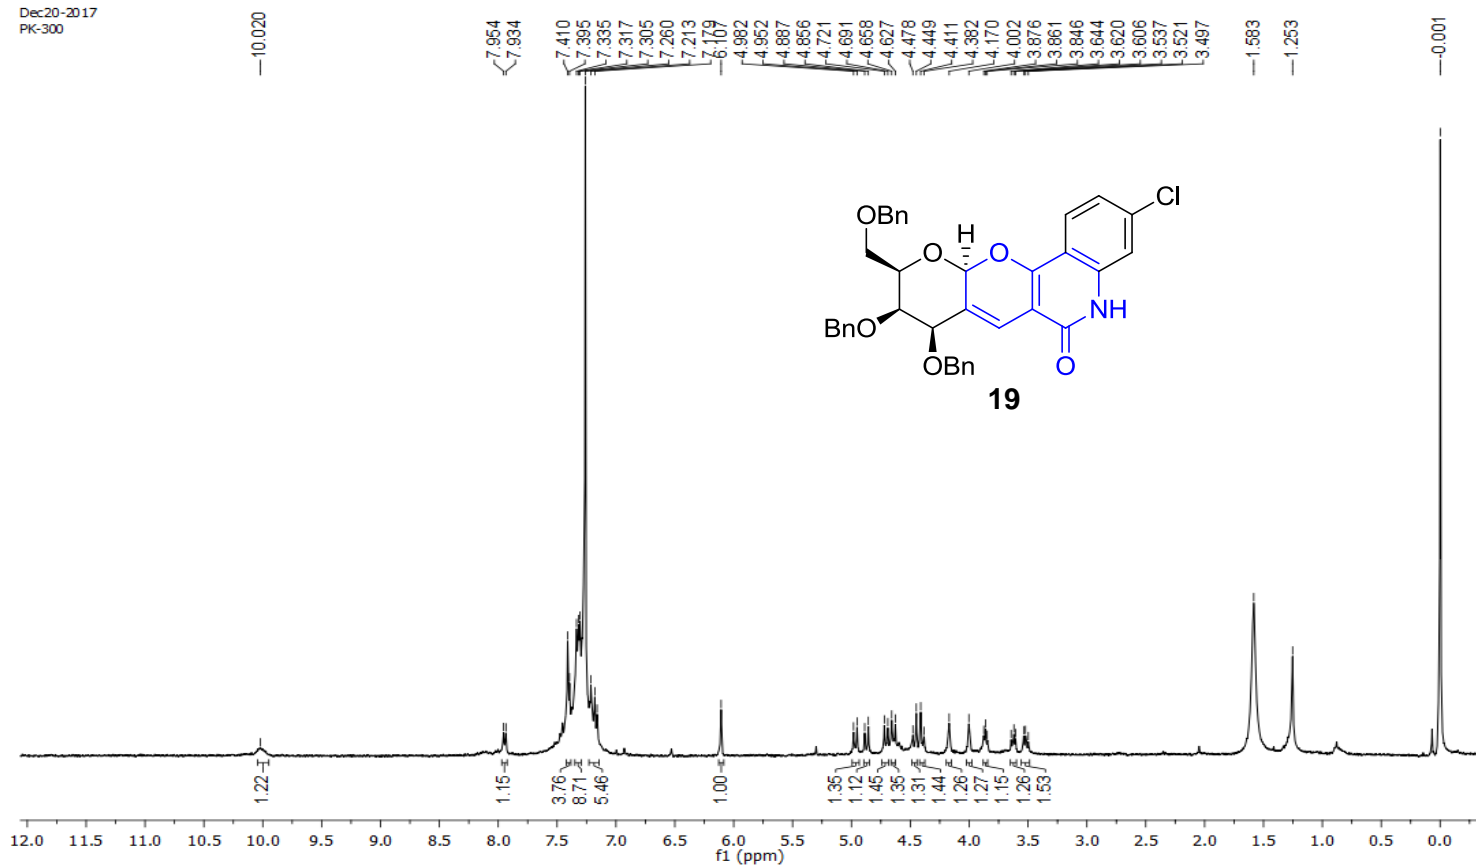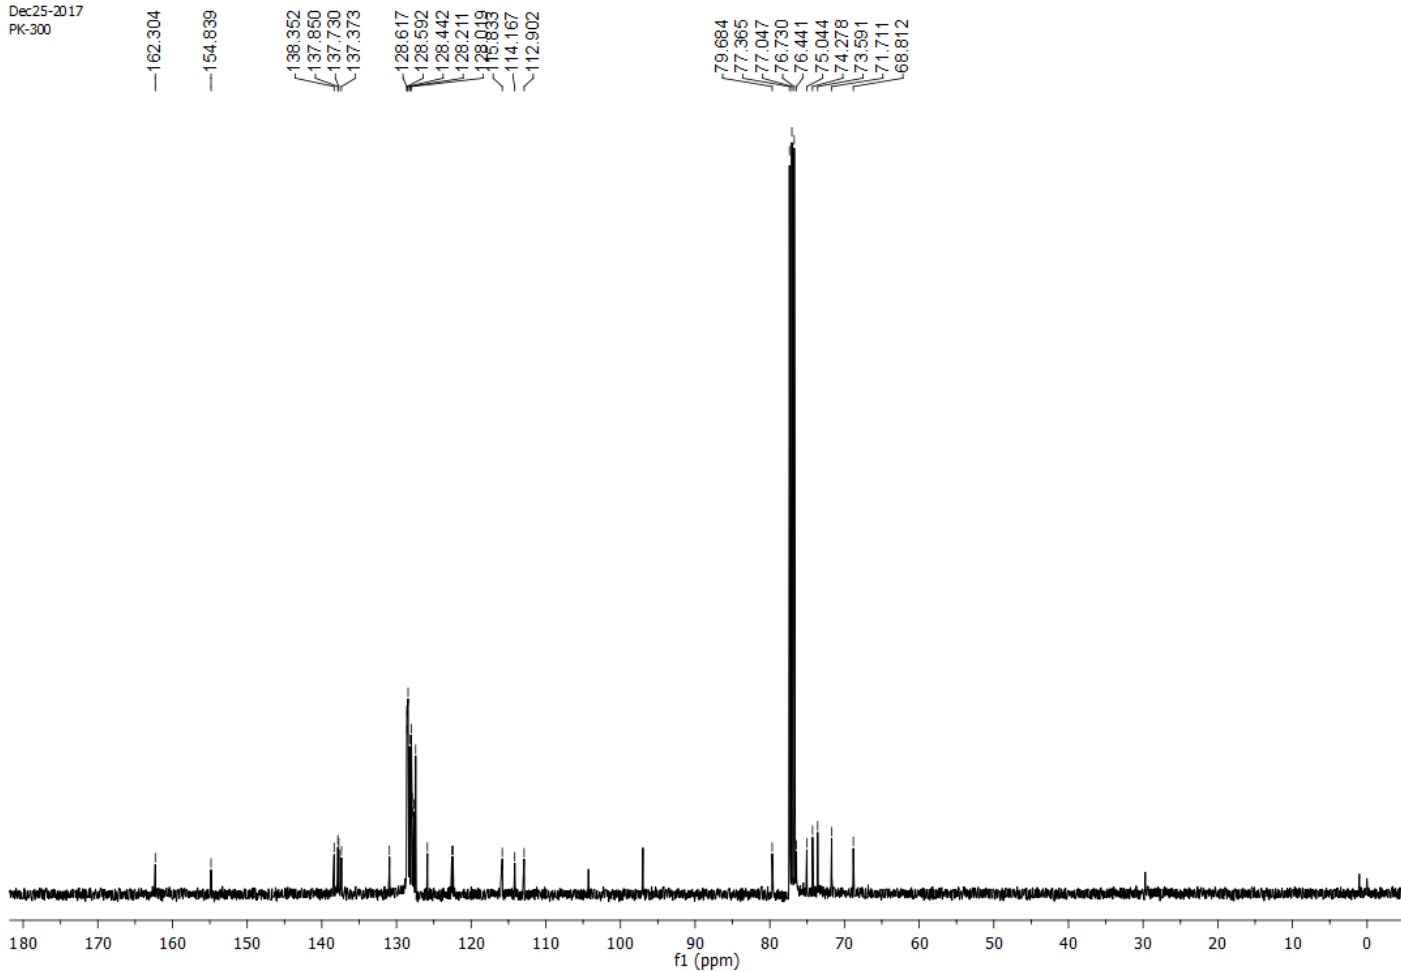

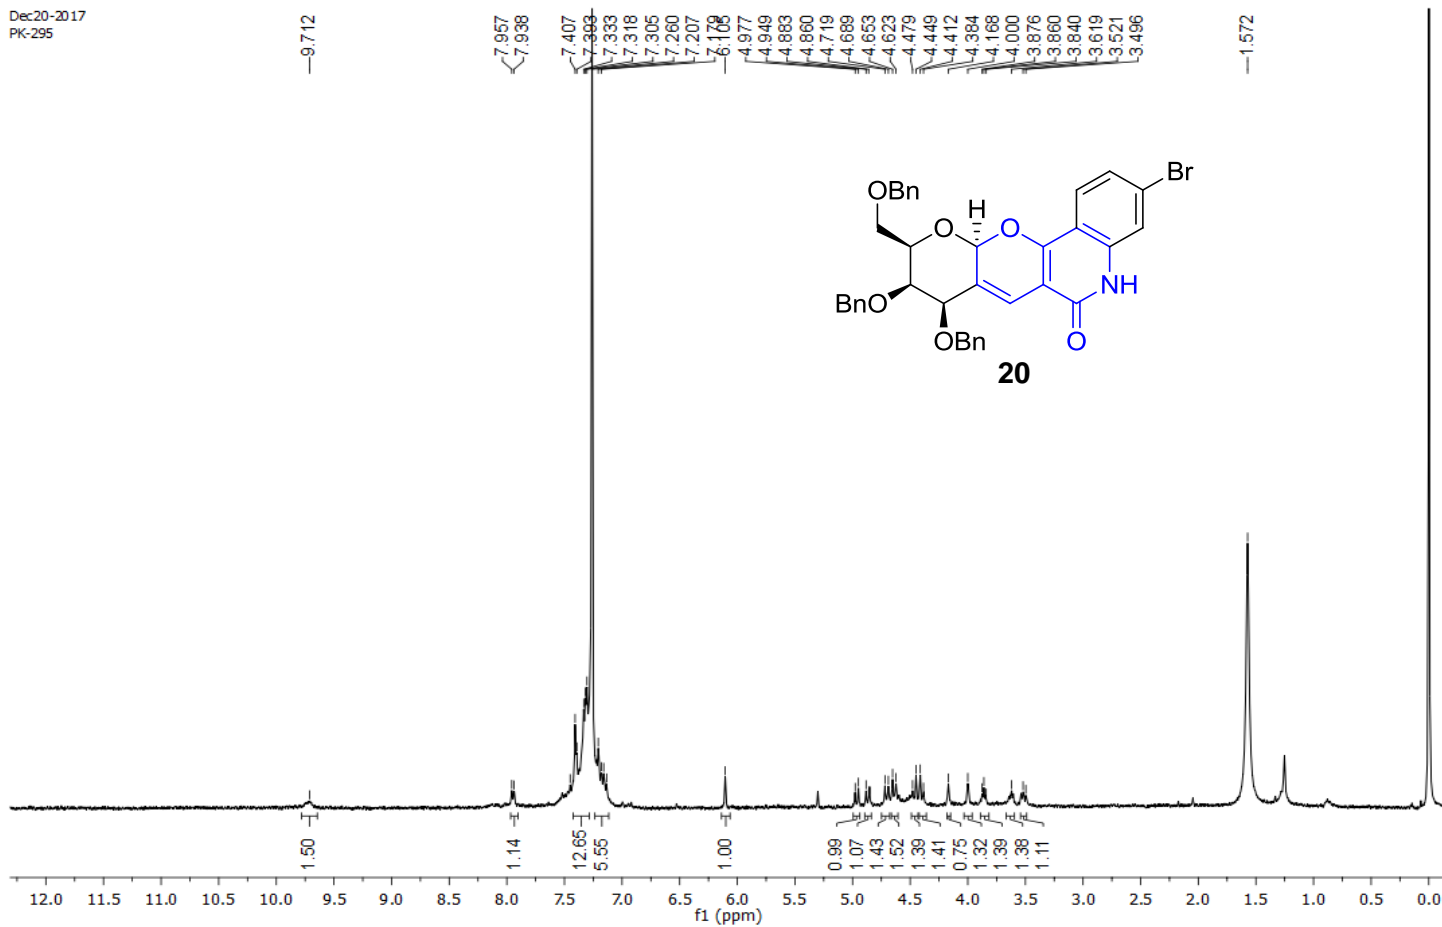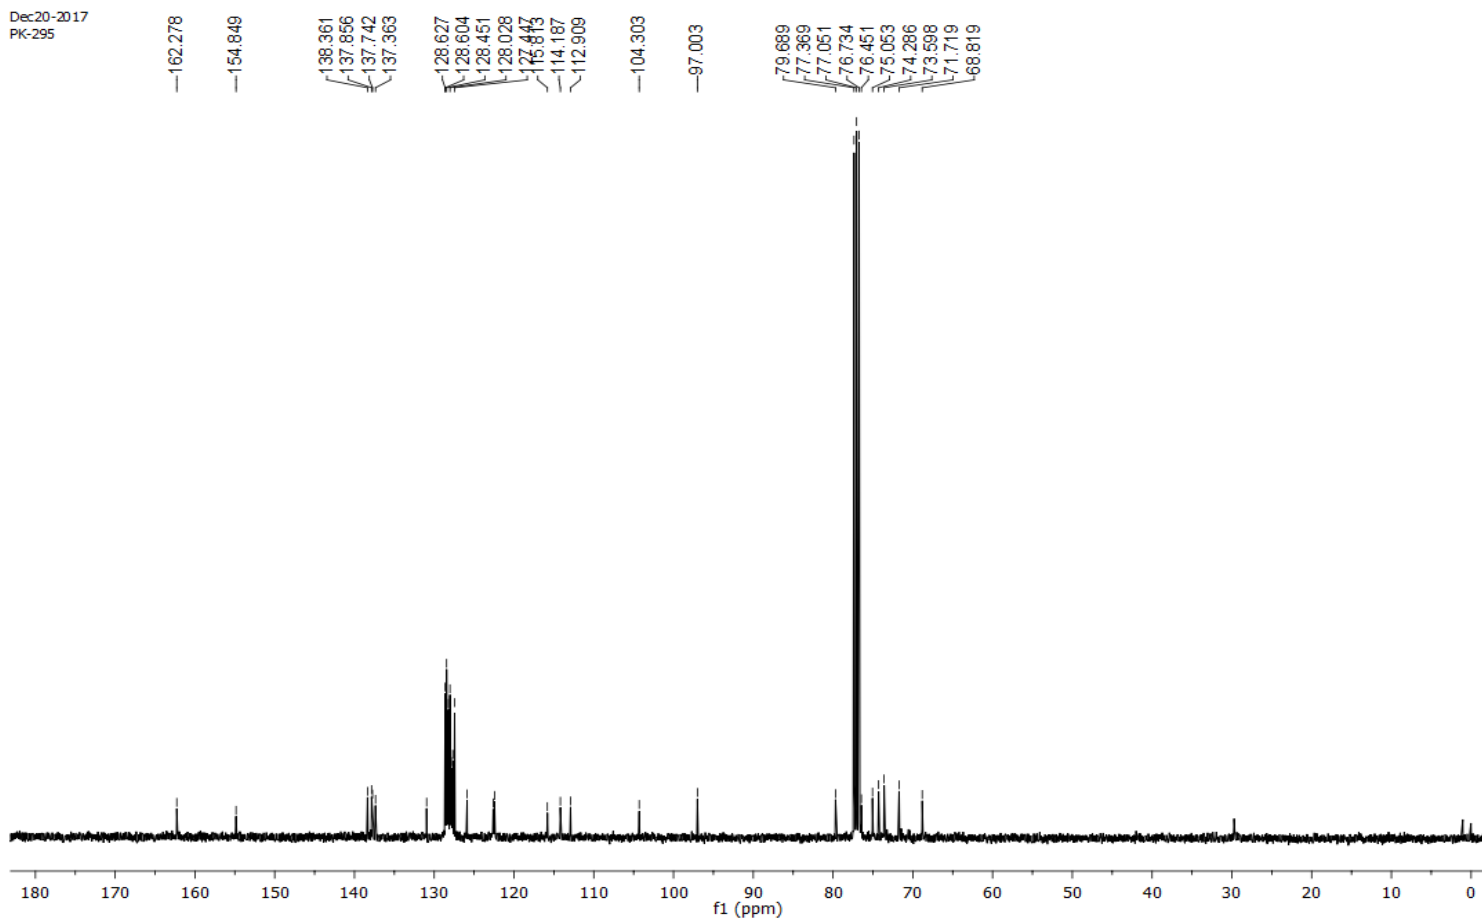

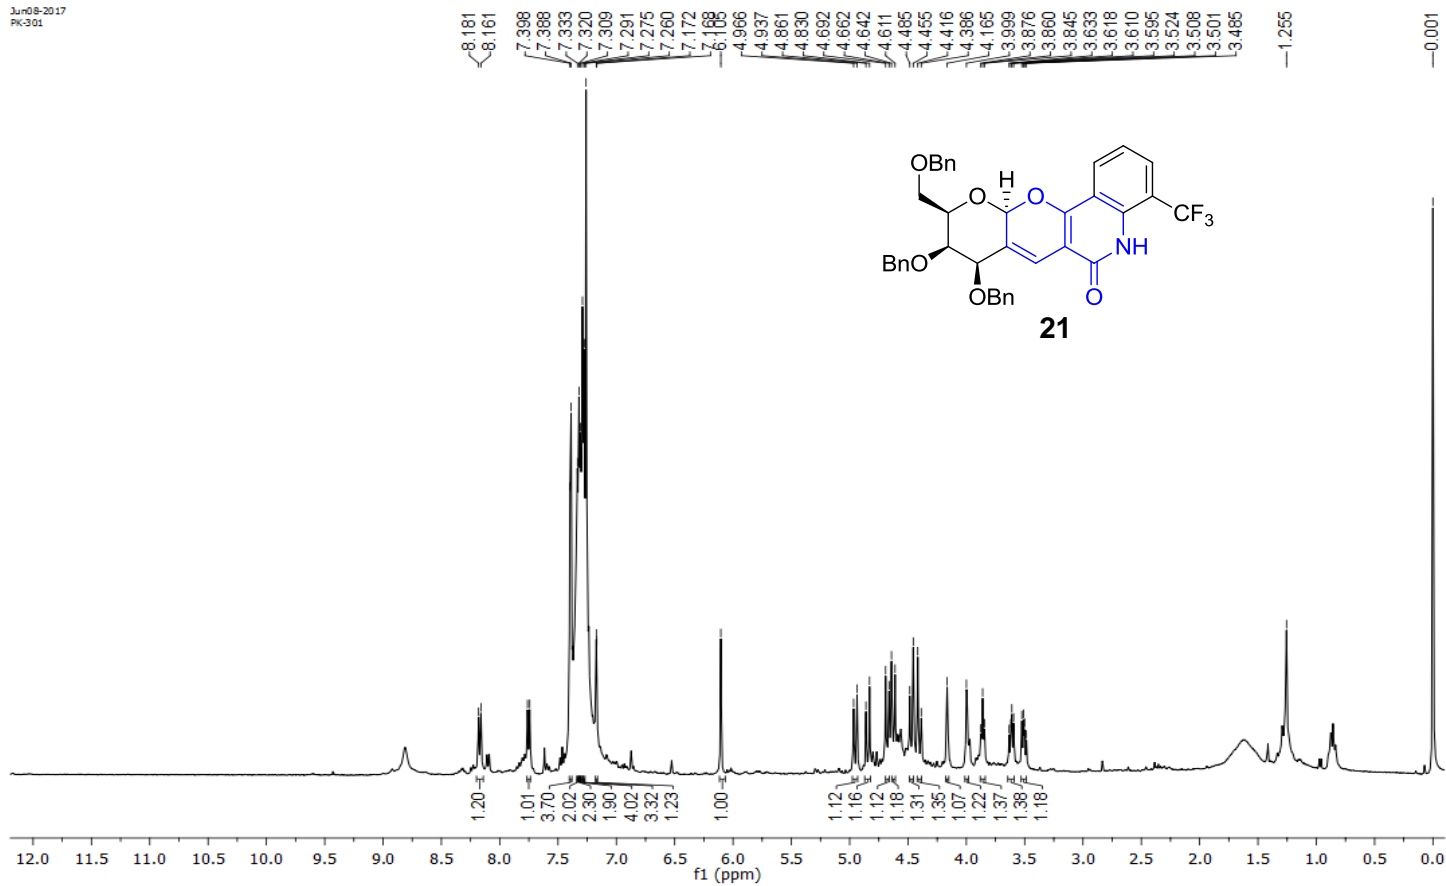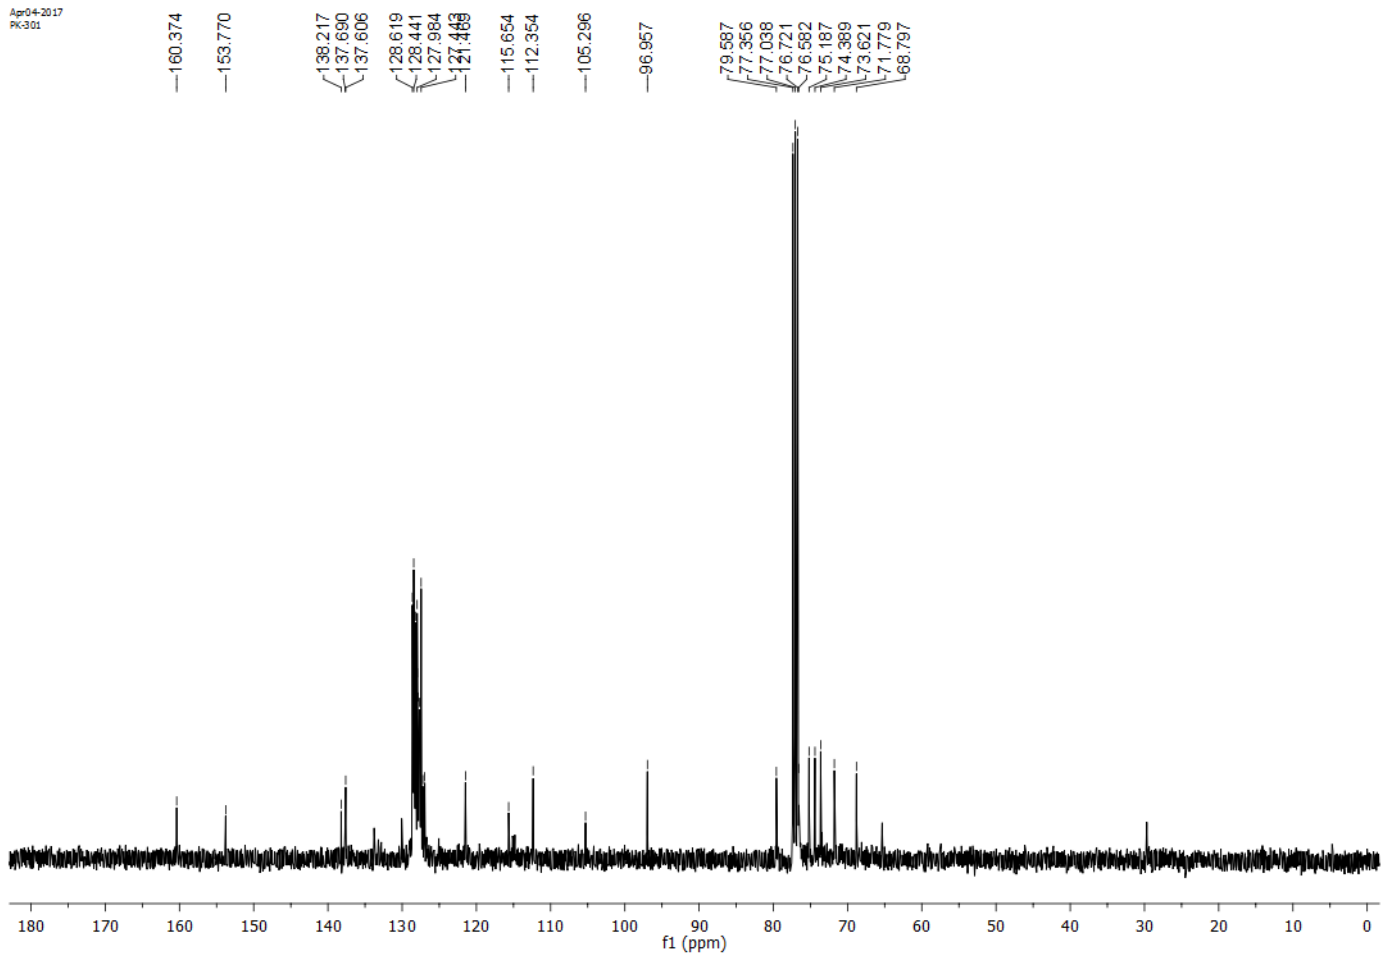



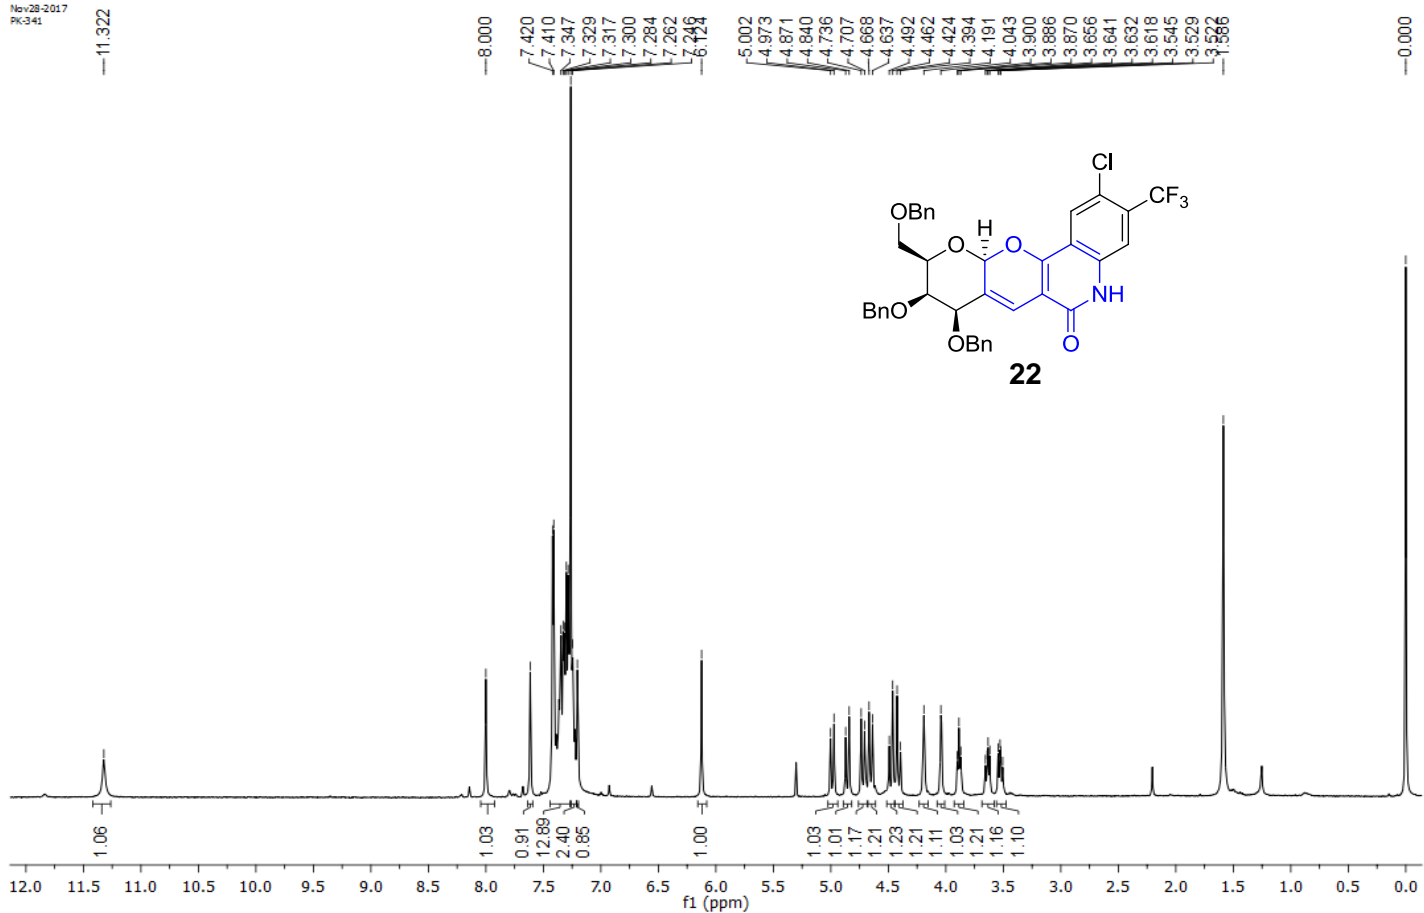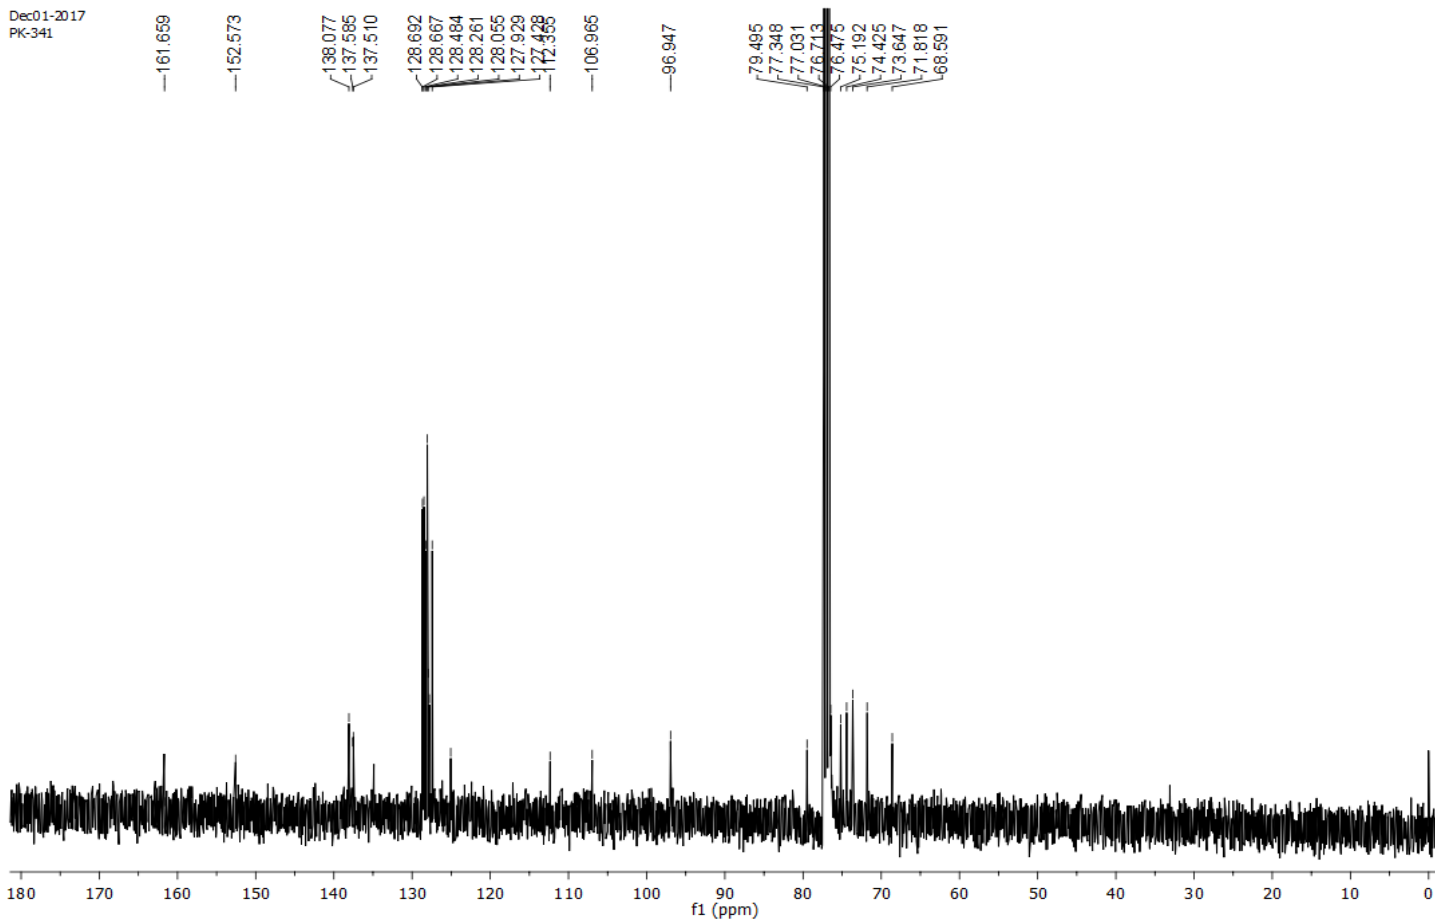

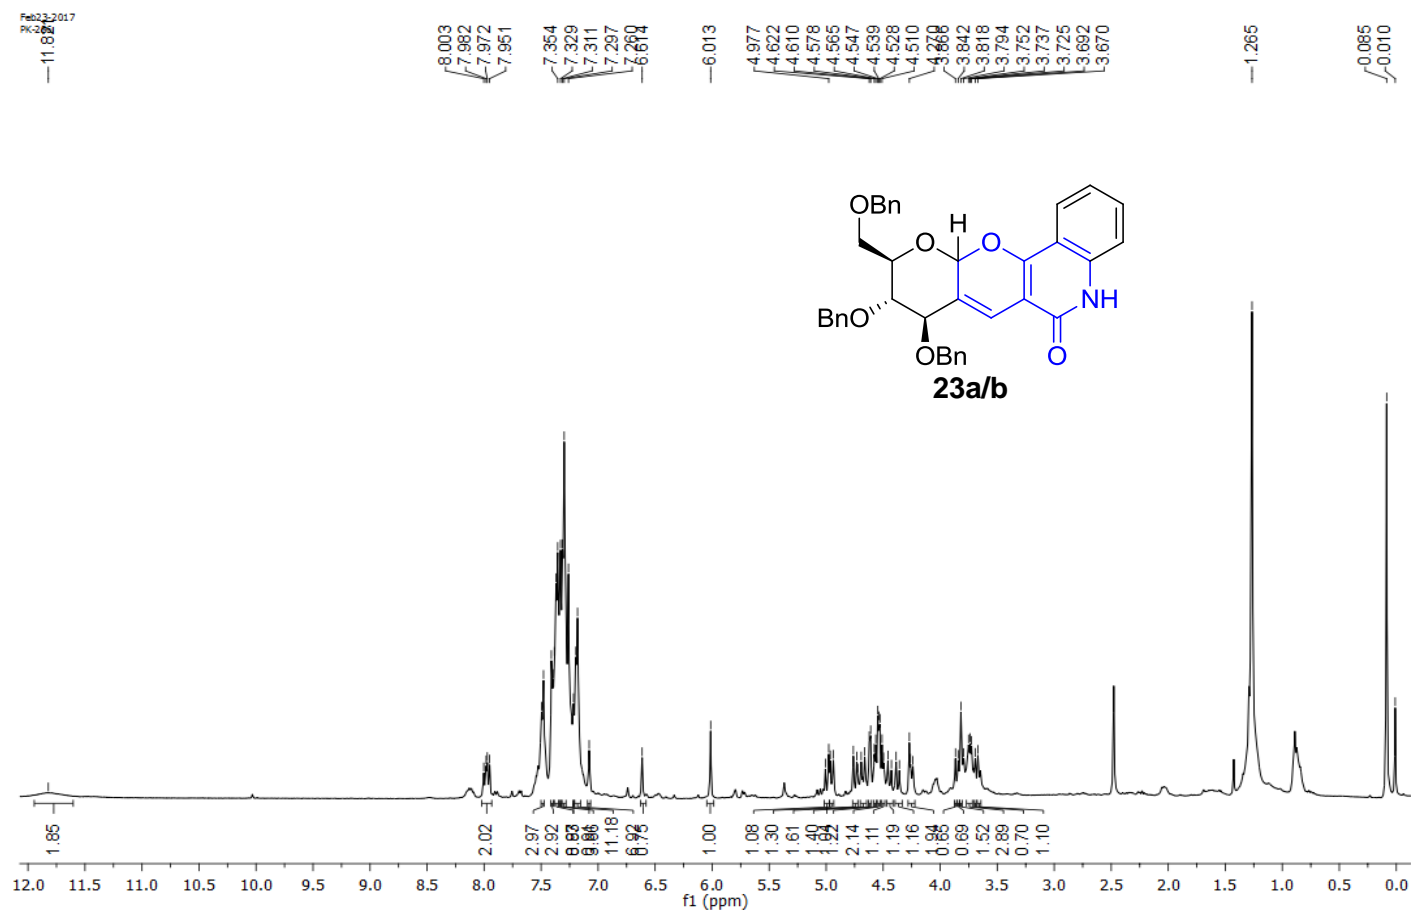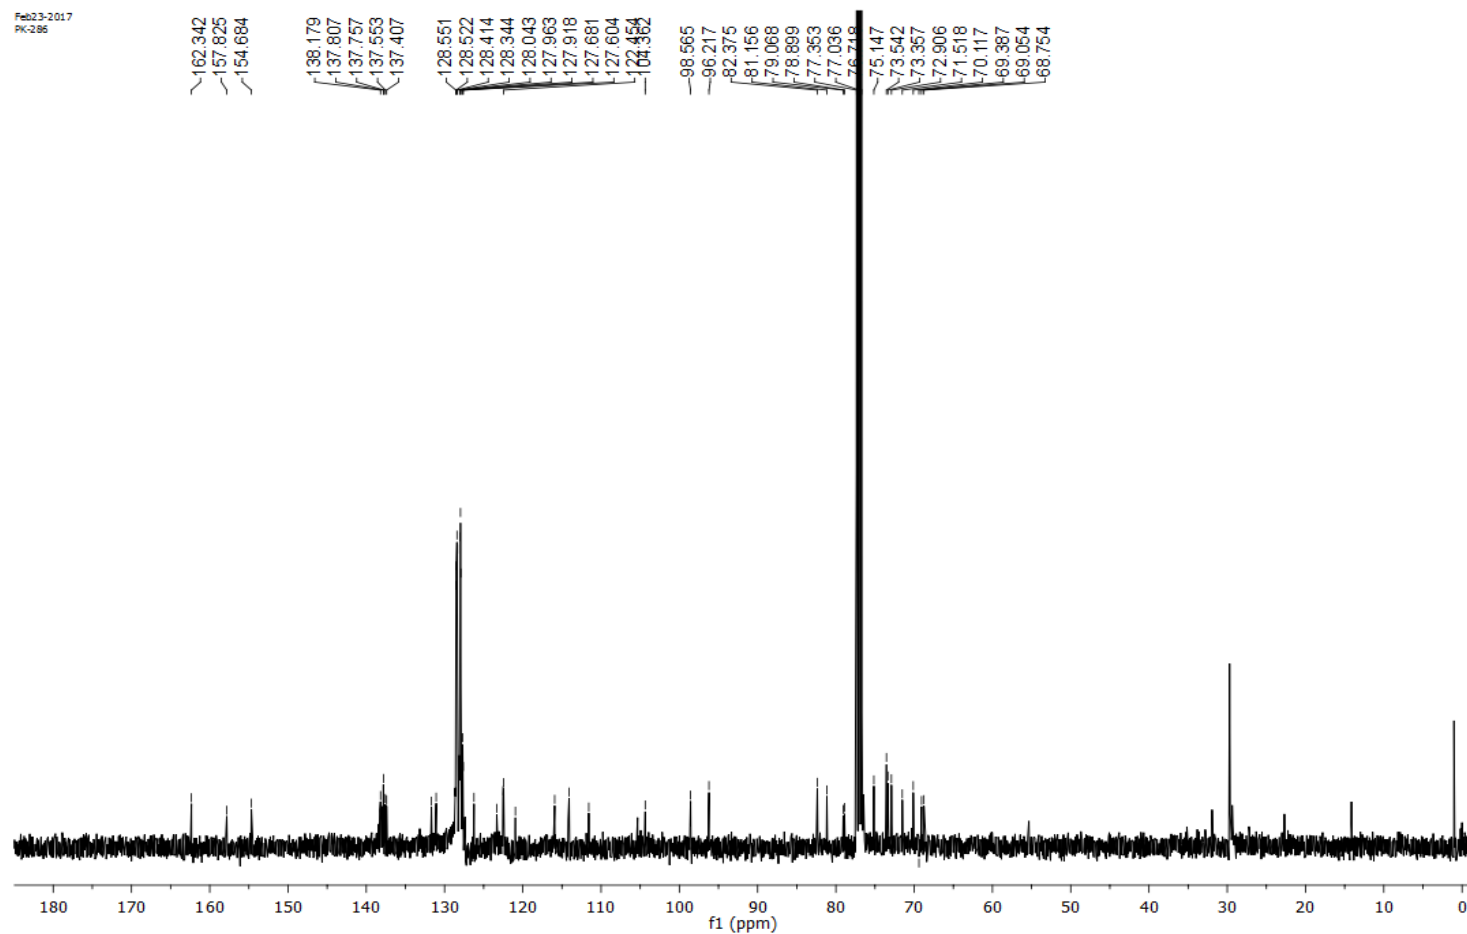

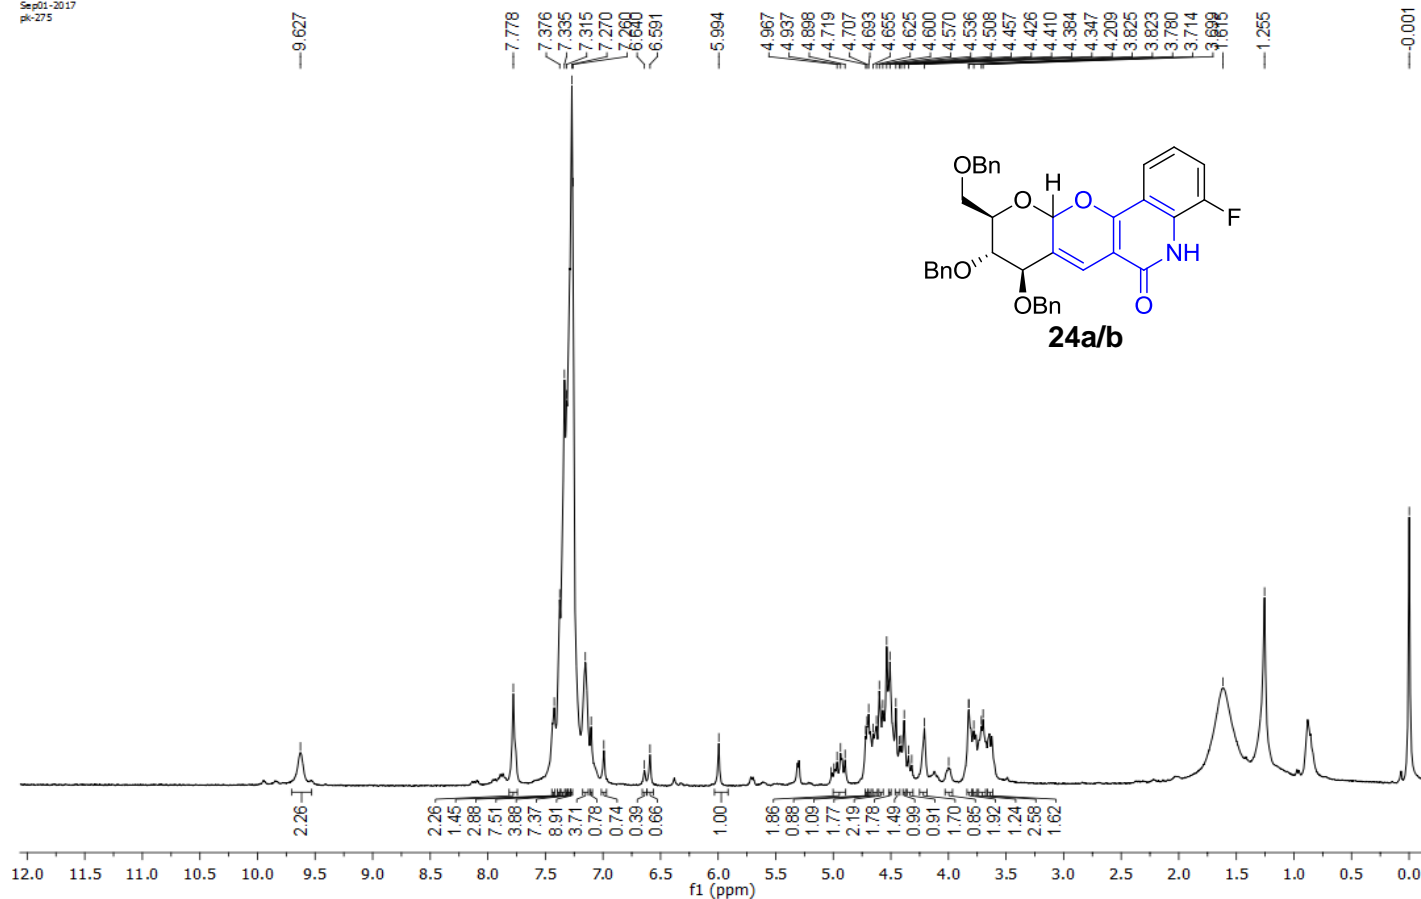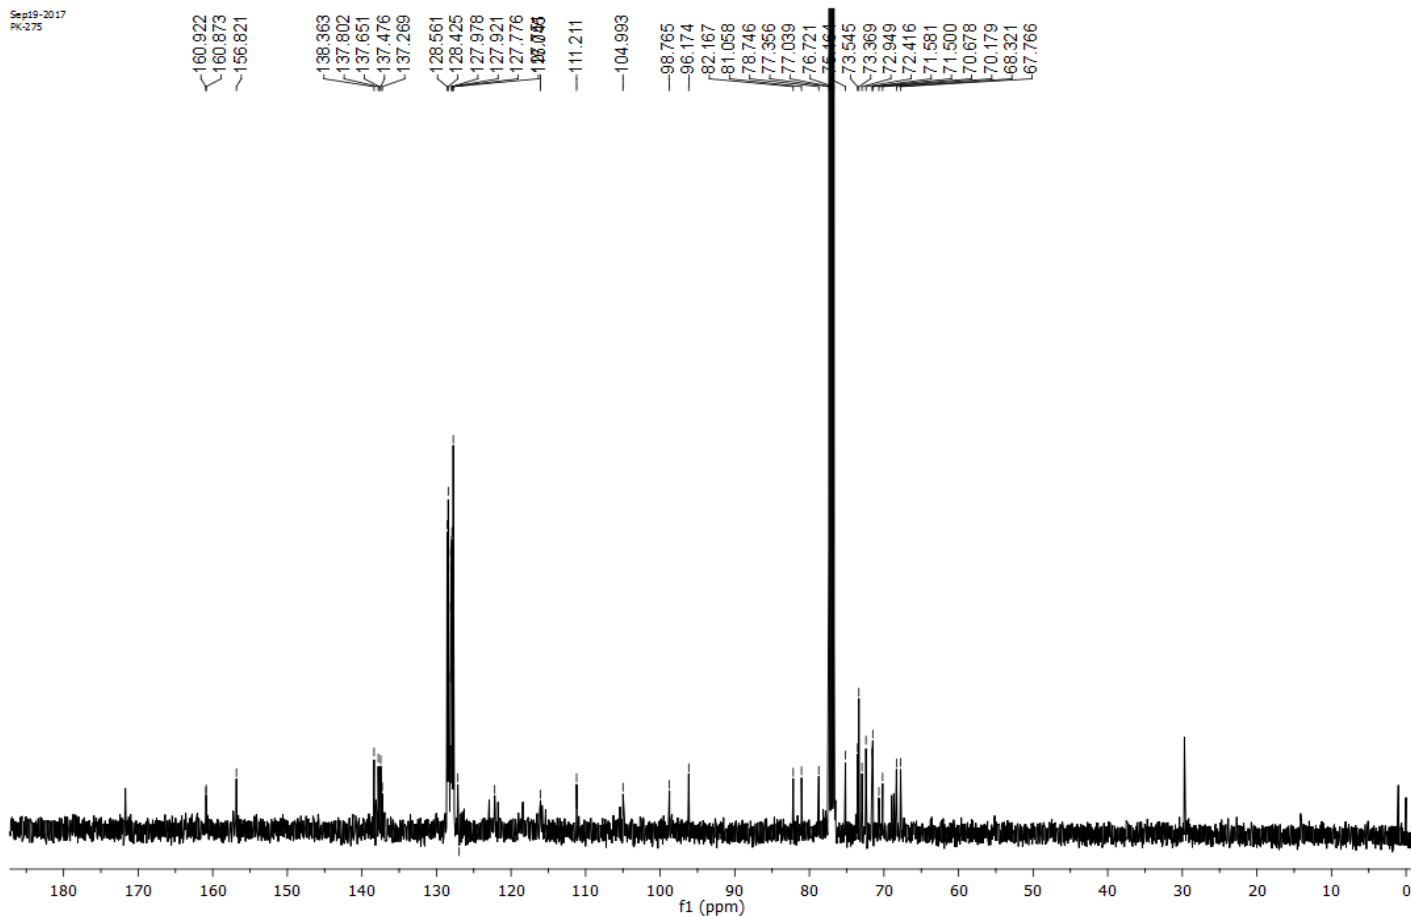

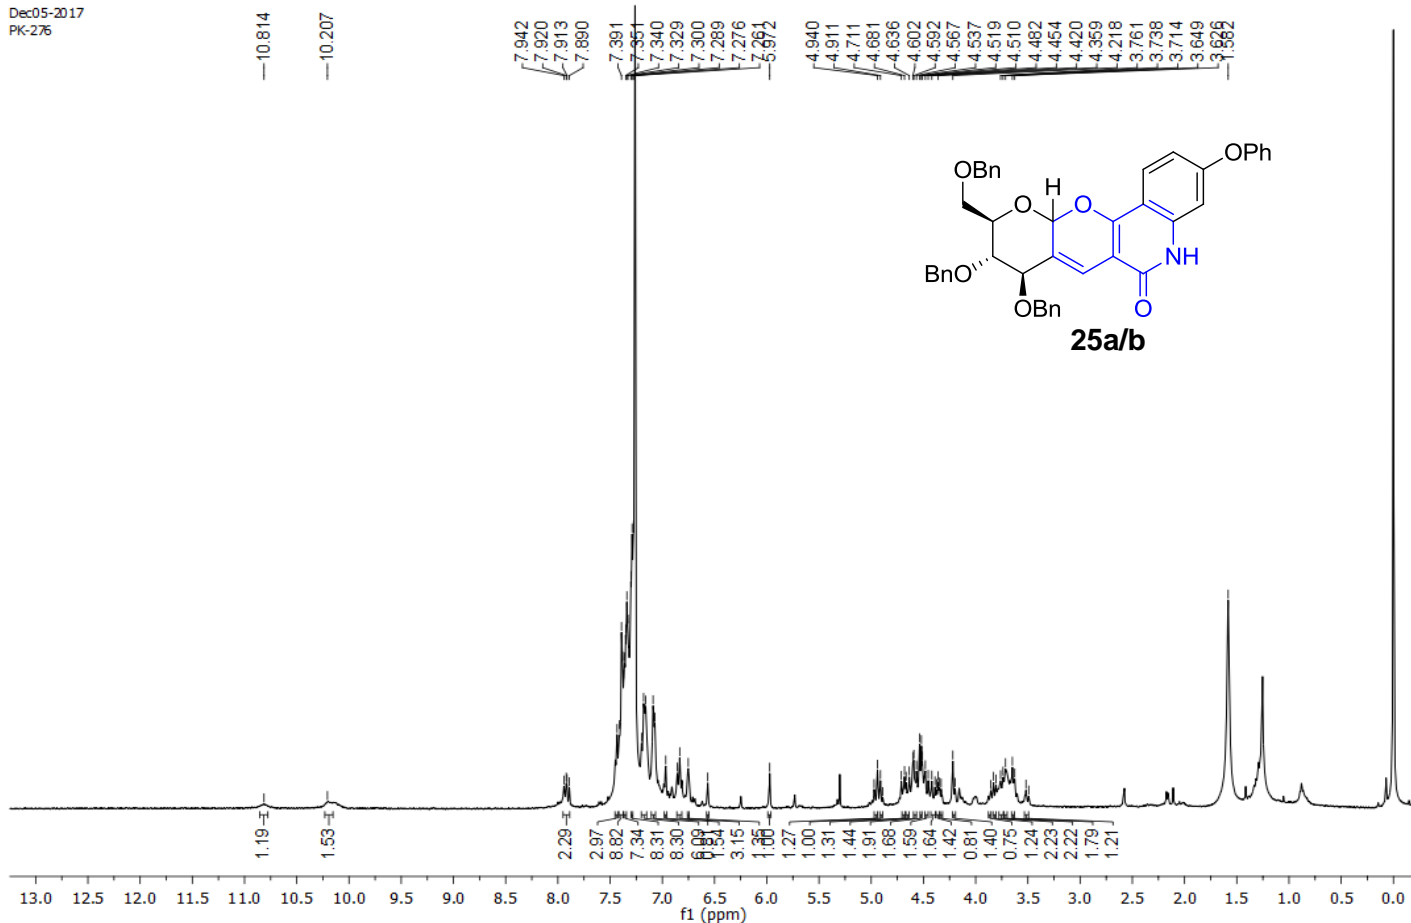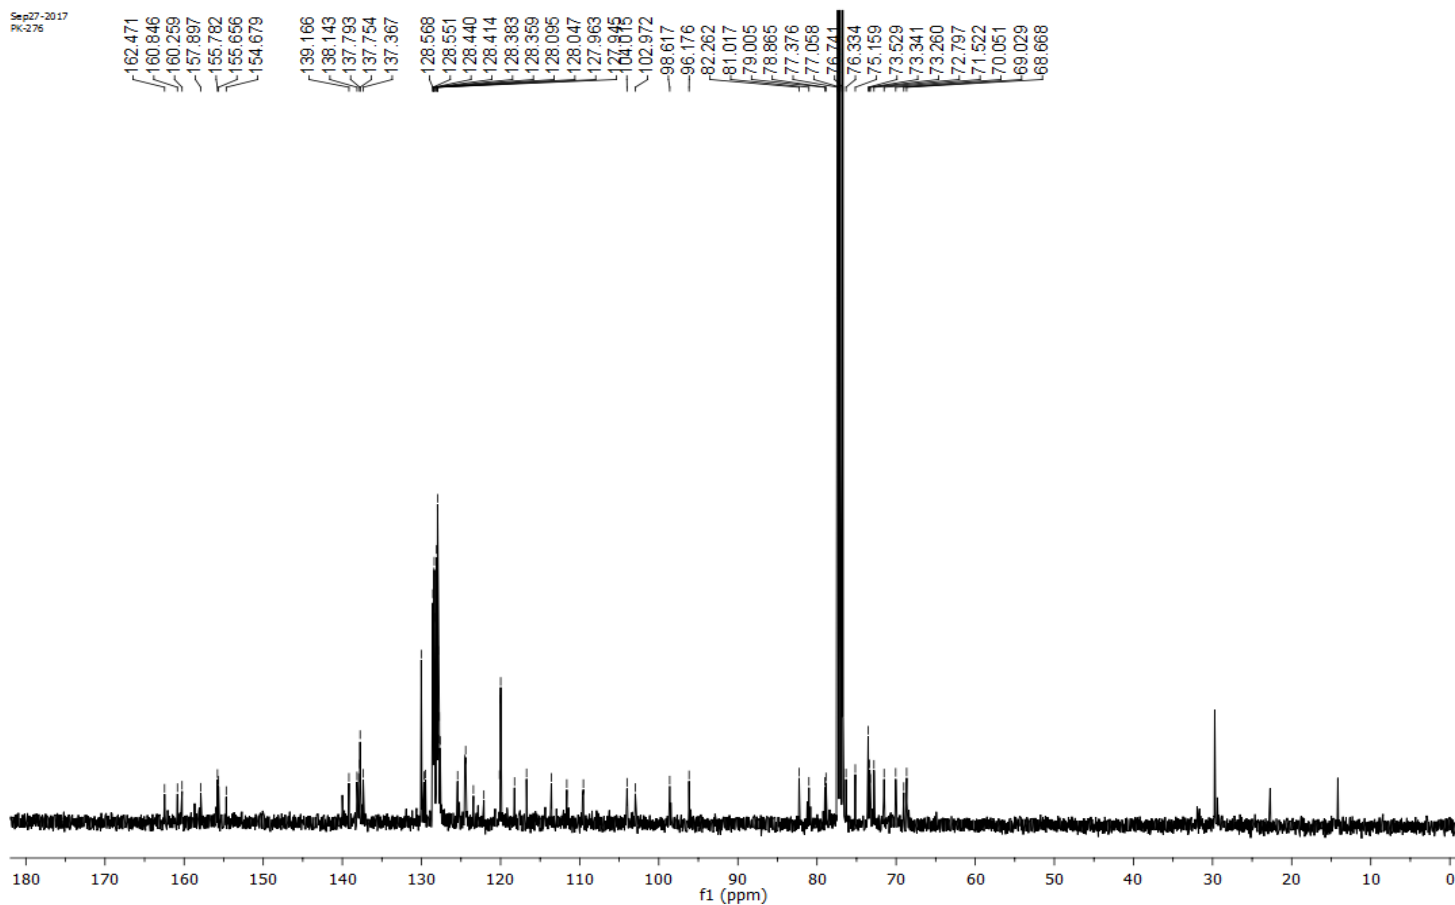

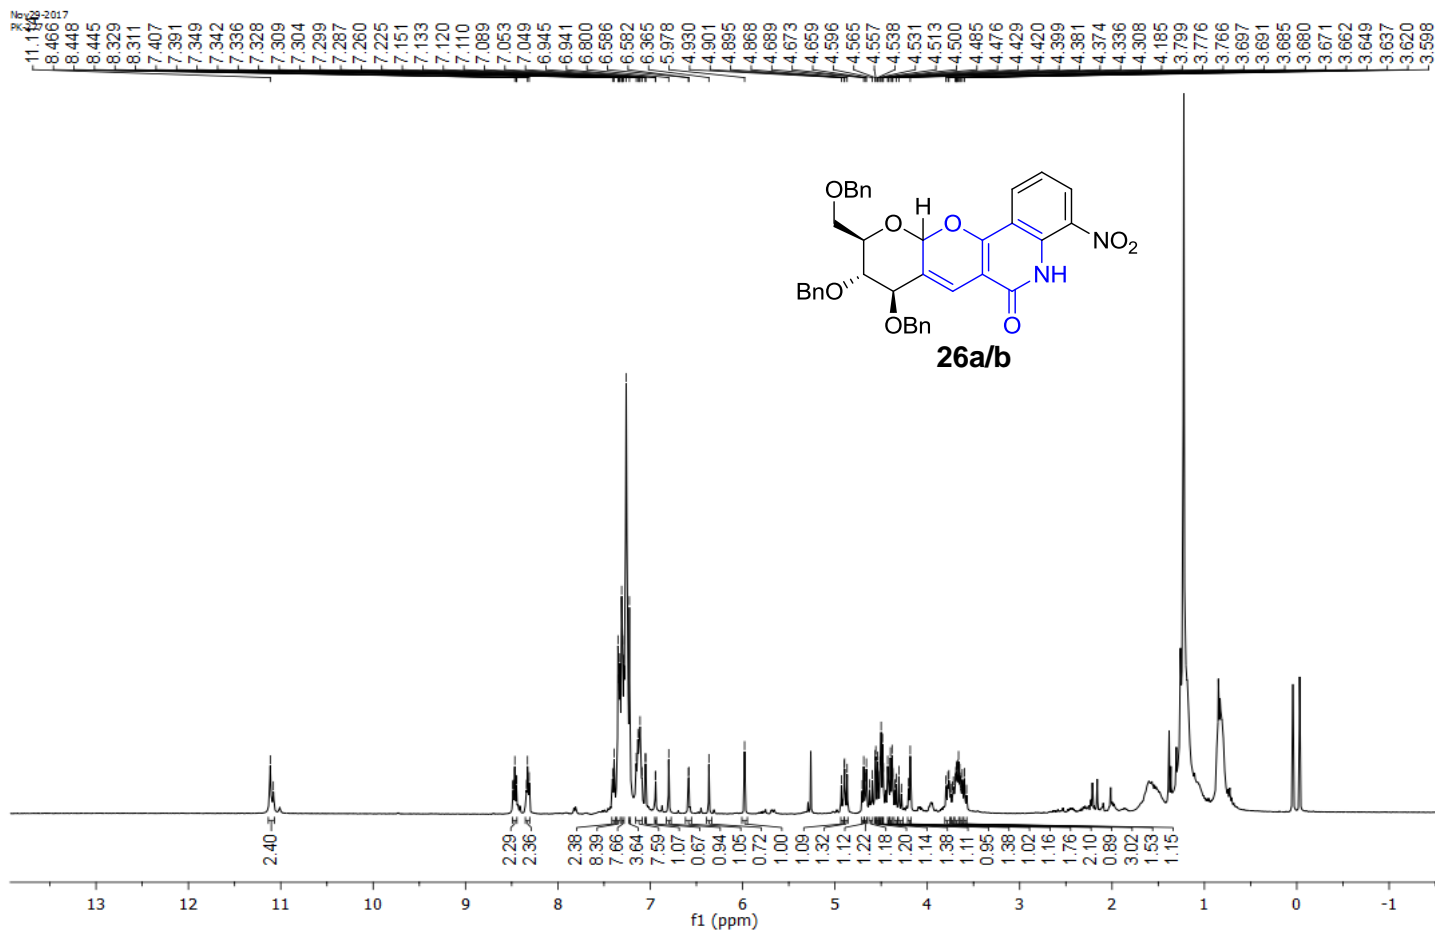

Dec01-2017  
Pk-277

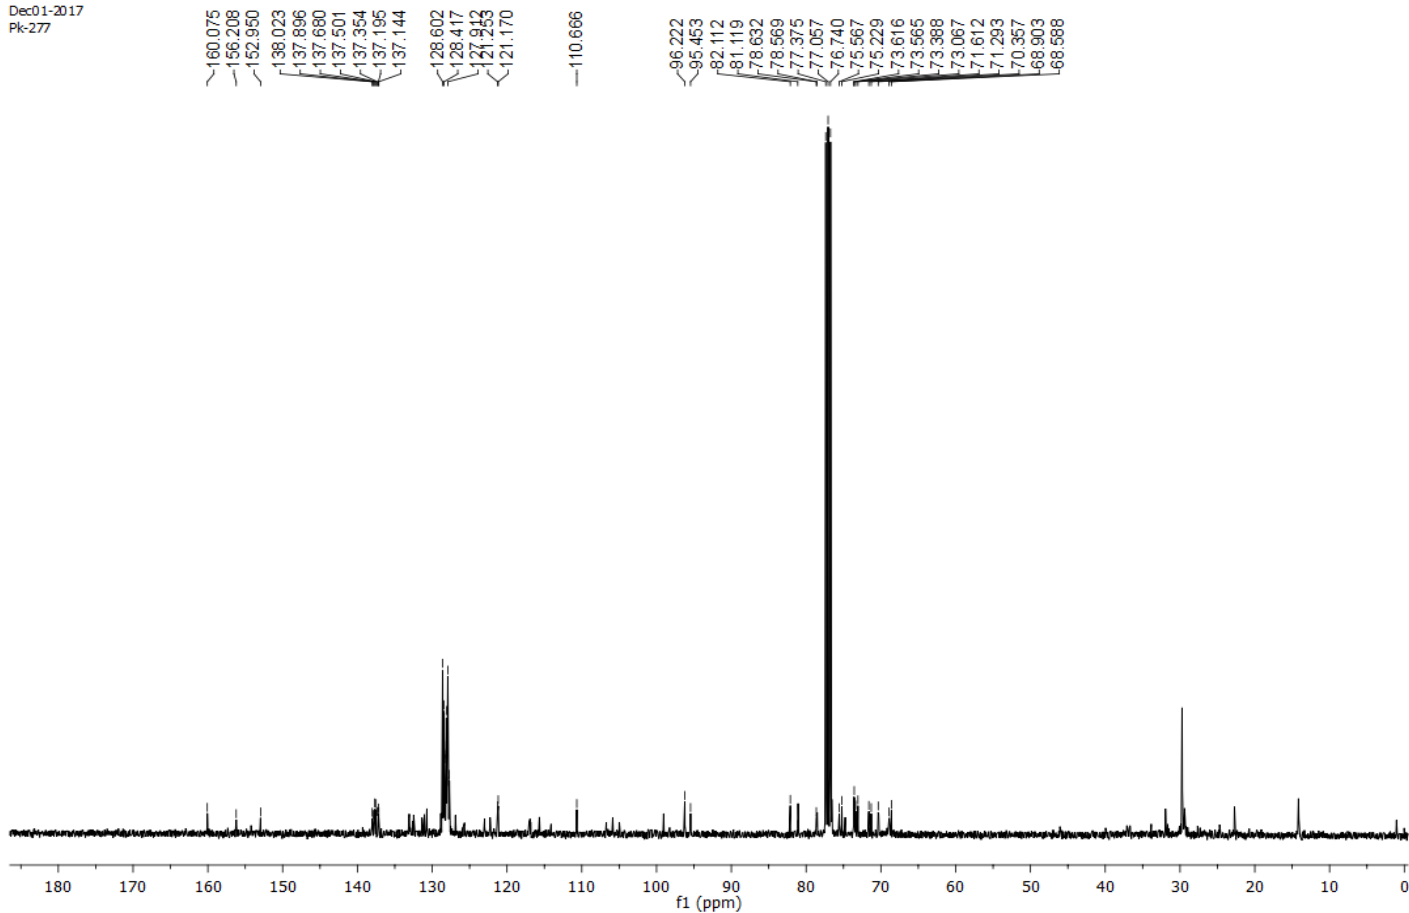

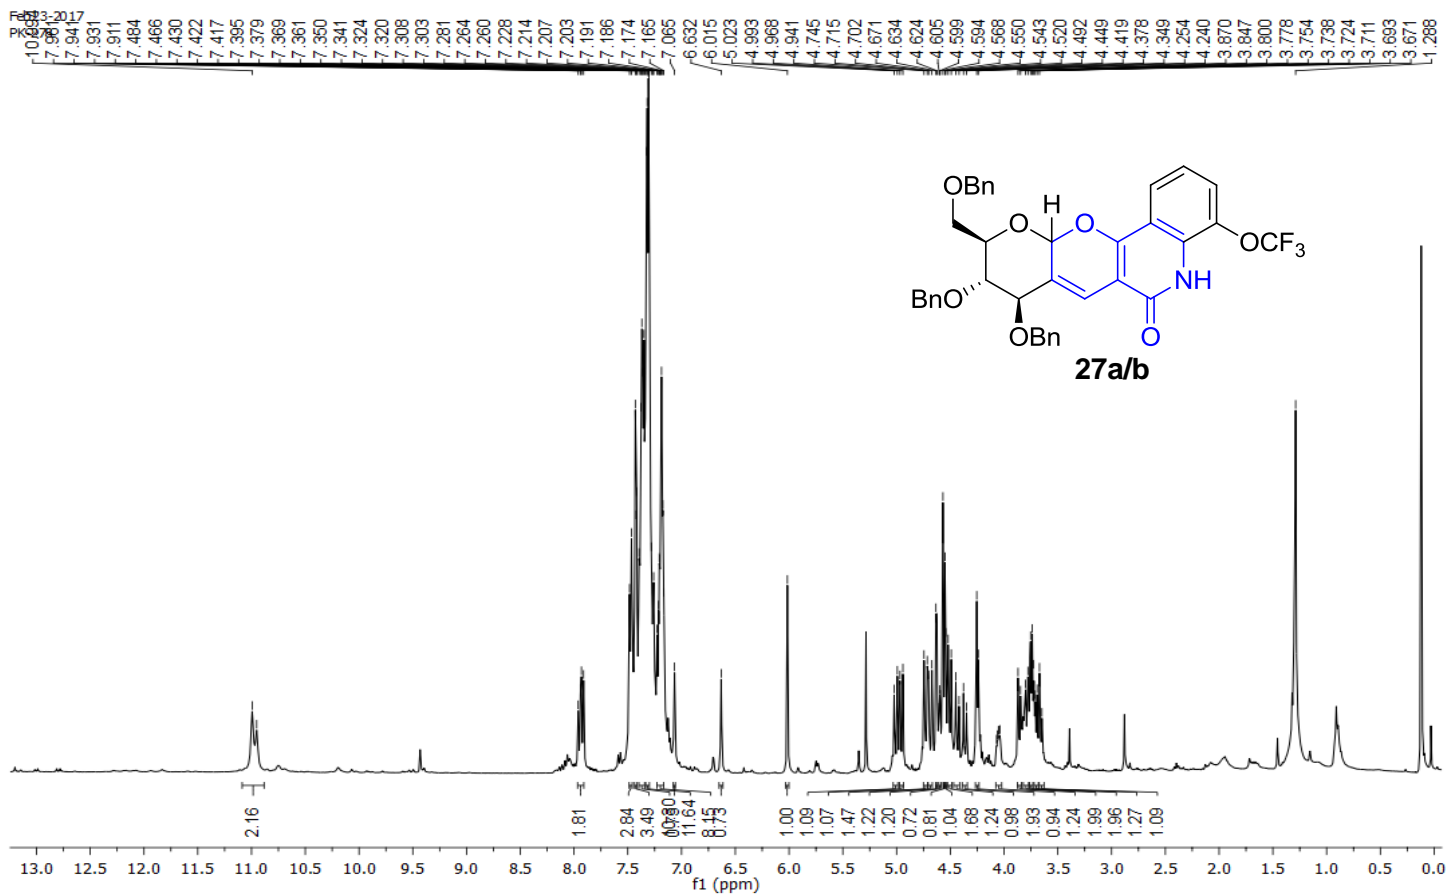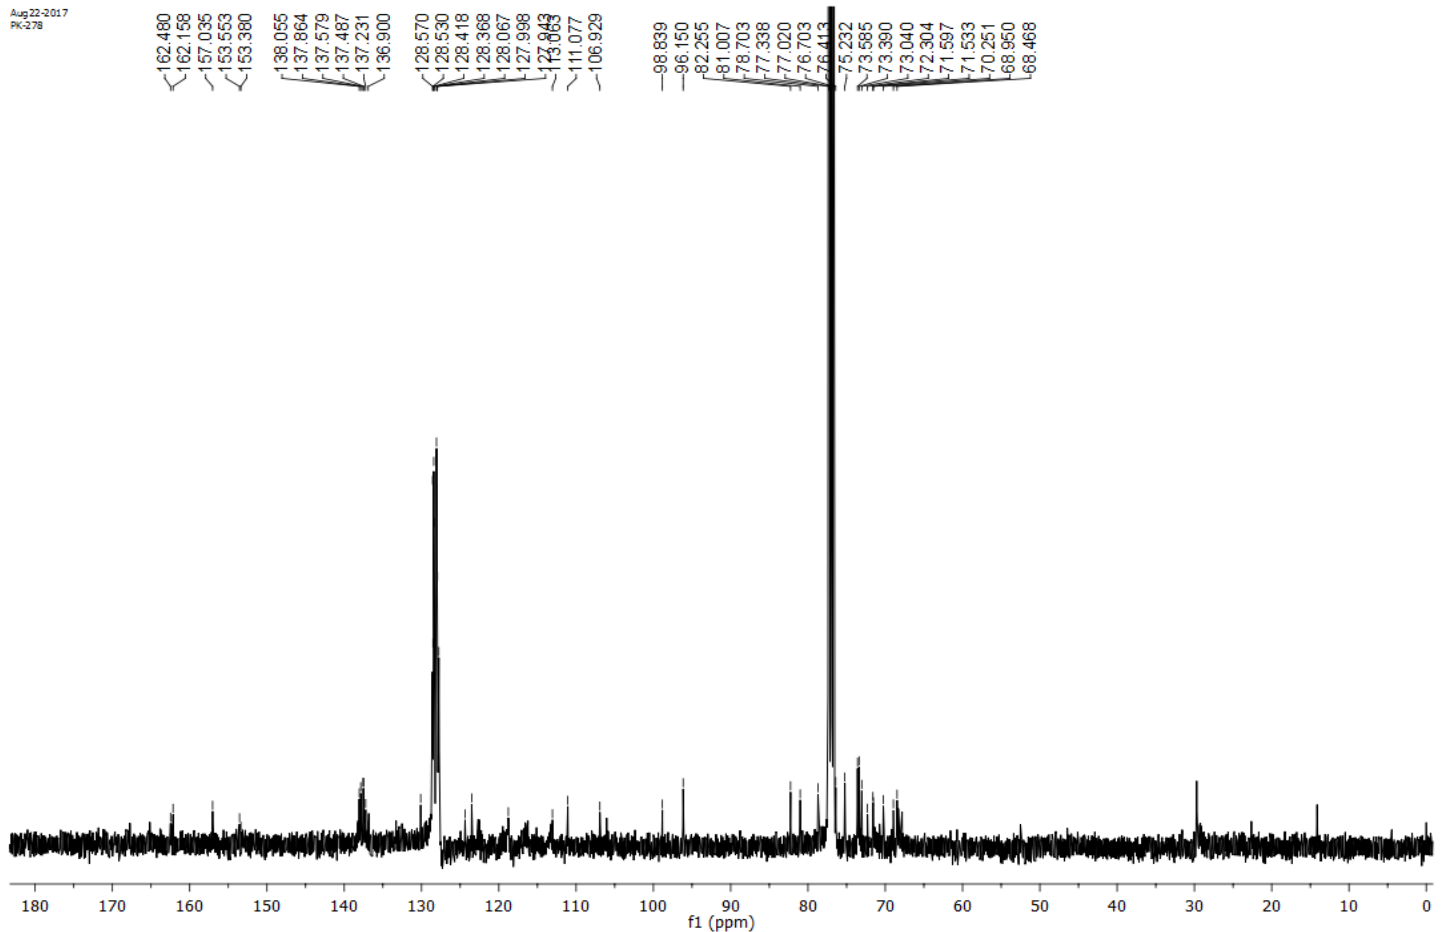

Aug16-2017  
PK-279-1H

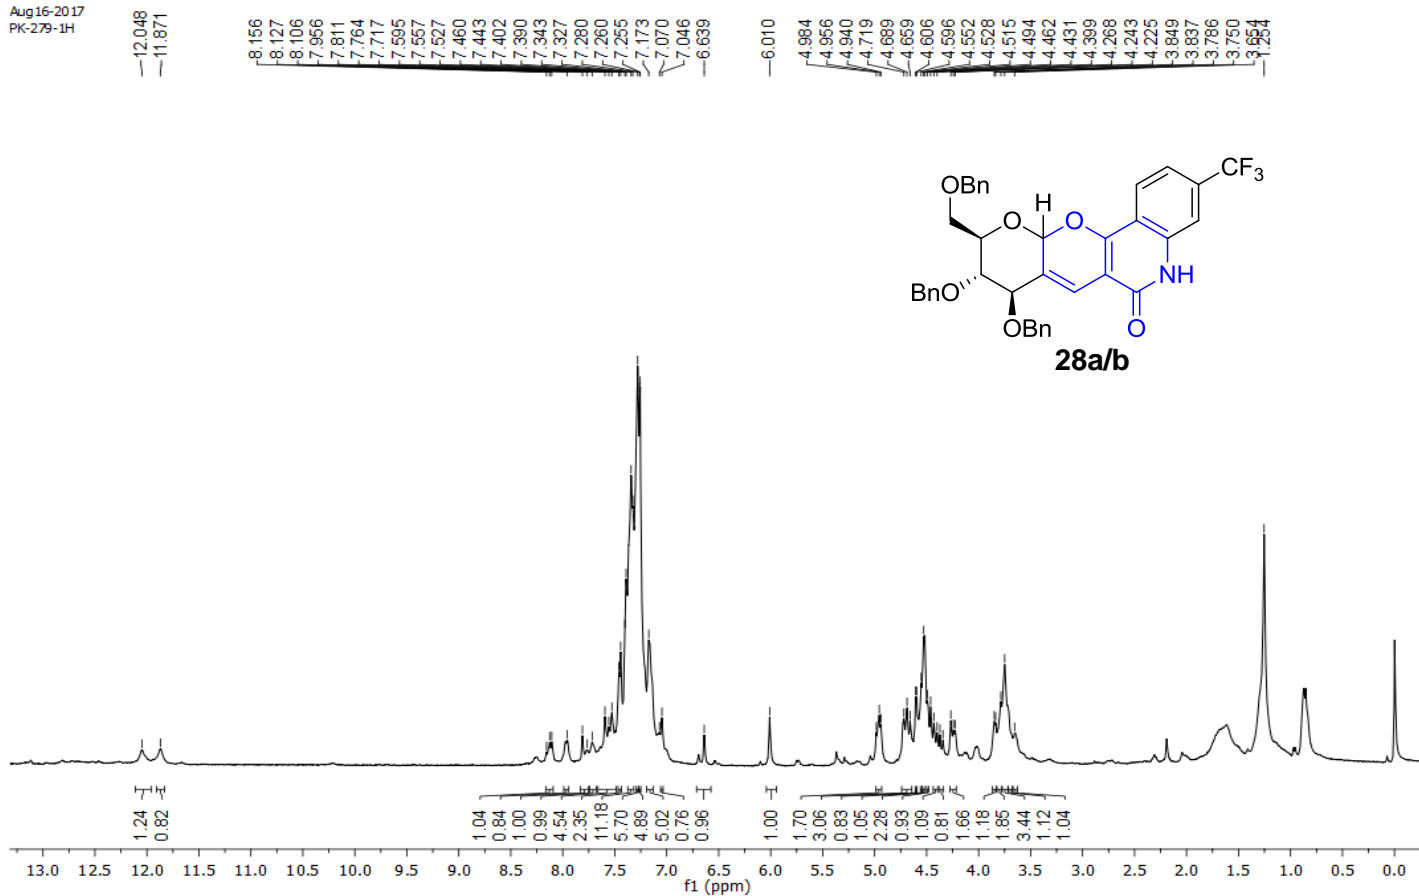

Aug22-2017  
PK-278

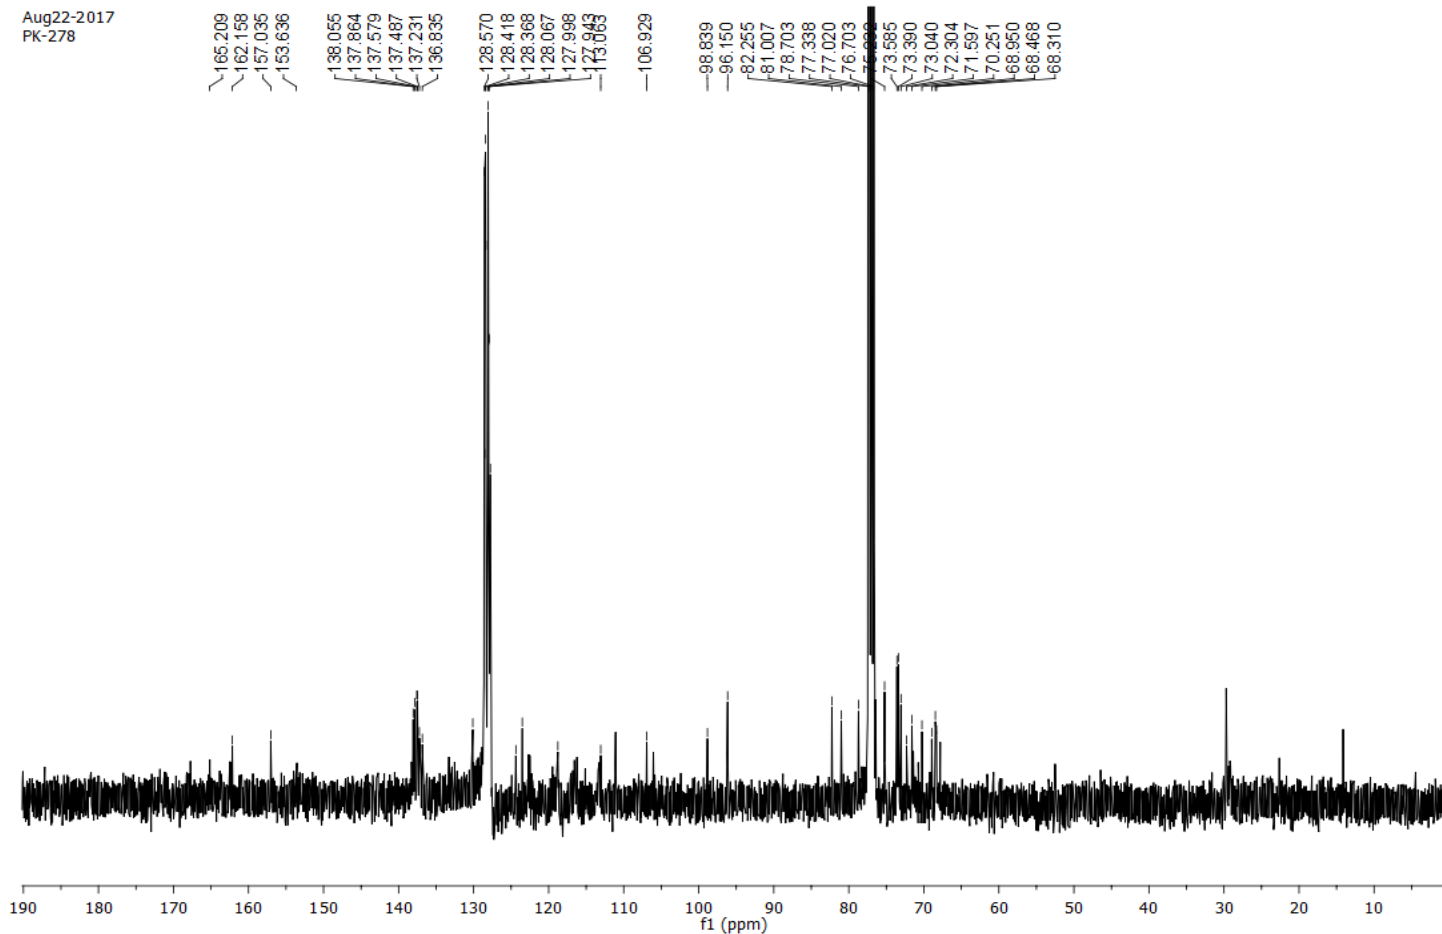

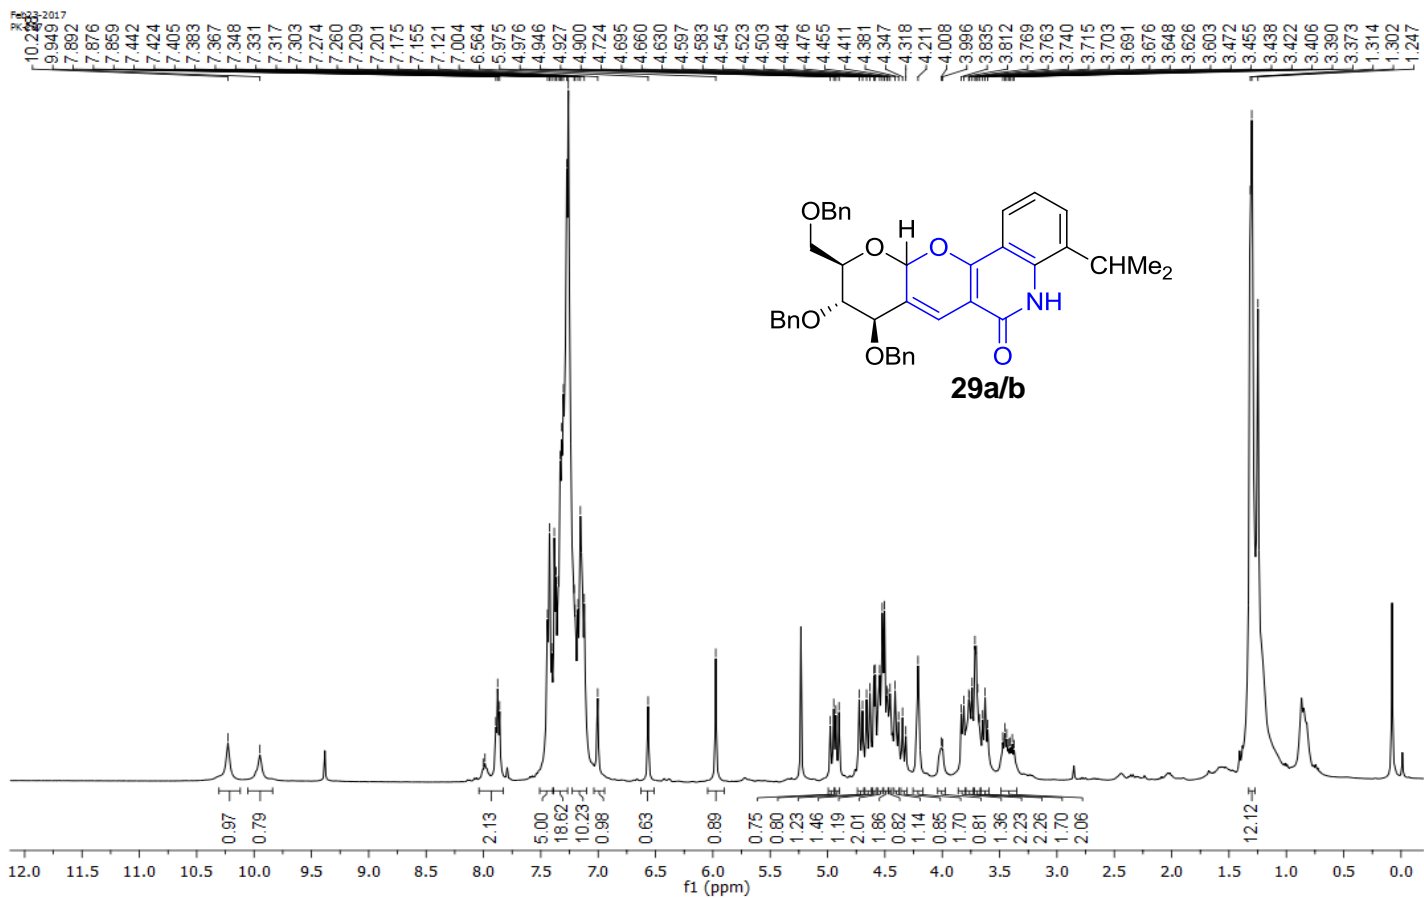

Feb23-2017  
PK-287

164.351, 161.748, 161.547, 158.194, 155.030, 128.570, 128.546, 128.440, 128.412, 128.372, 128.092, 127.975, 127.937, 127.842, 127.788, 127.737, 127.690, 127.629, 127.528, 114.331, 111.480, 105.128, 104.114, 98.644, 96.304, 82.348, 81.230, 79.373, 78.845, 77.445, 77.127, 76.809, 76.510, 75.124, 73.567, 73.358, 72.895, 71.528, 70.019, 69.091, 68.847, 68.449, 29.739, 26.887, 26.839, 22.962, 22.902, 22.881, 22.864

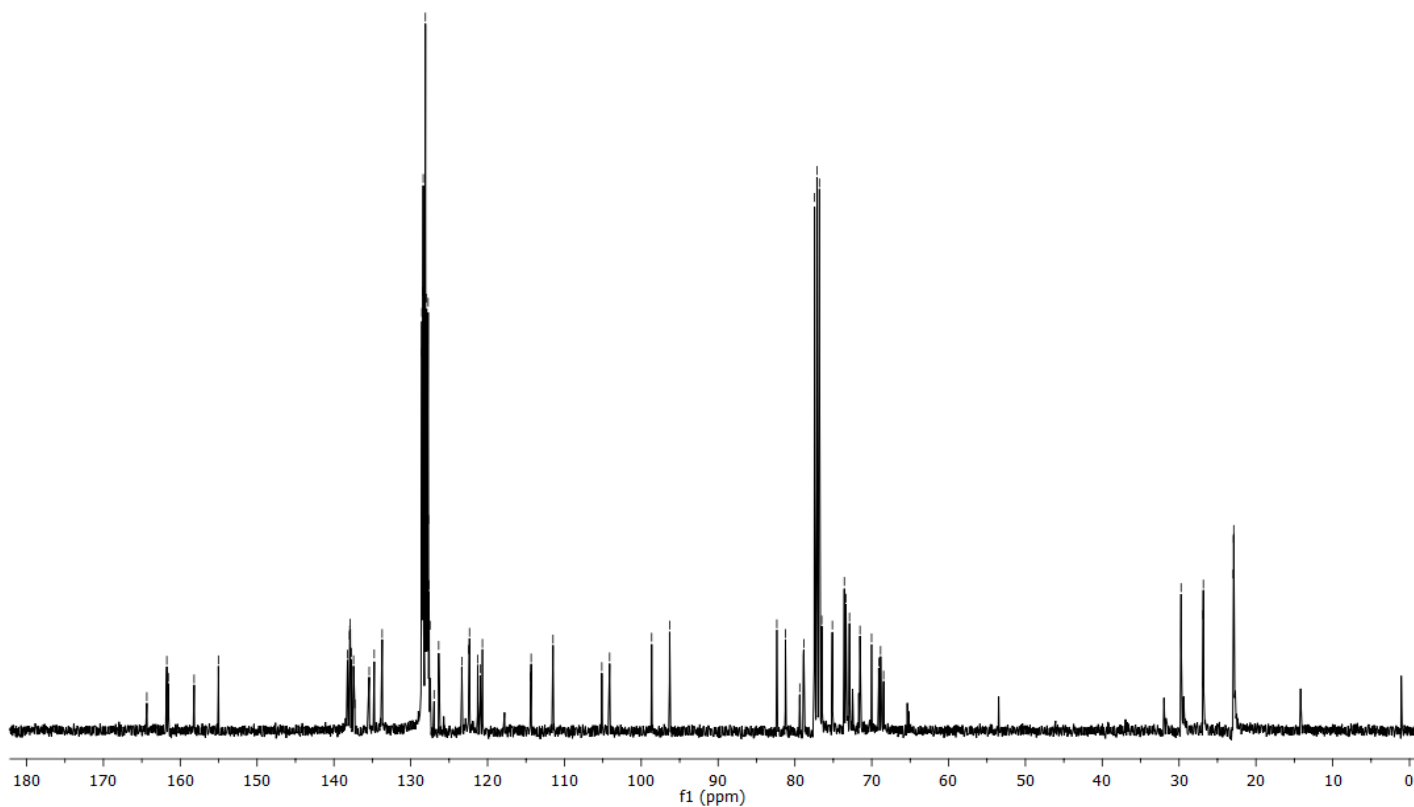



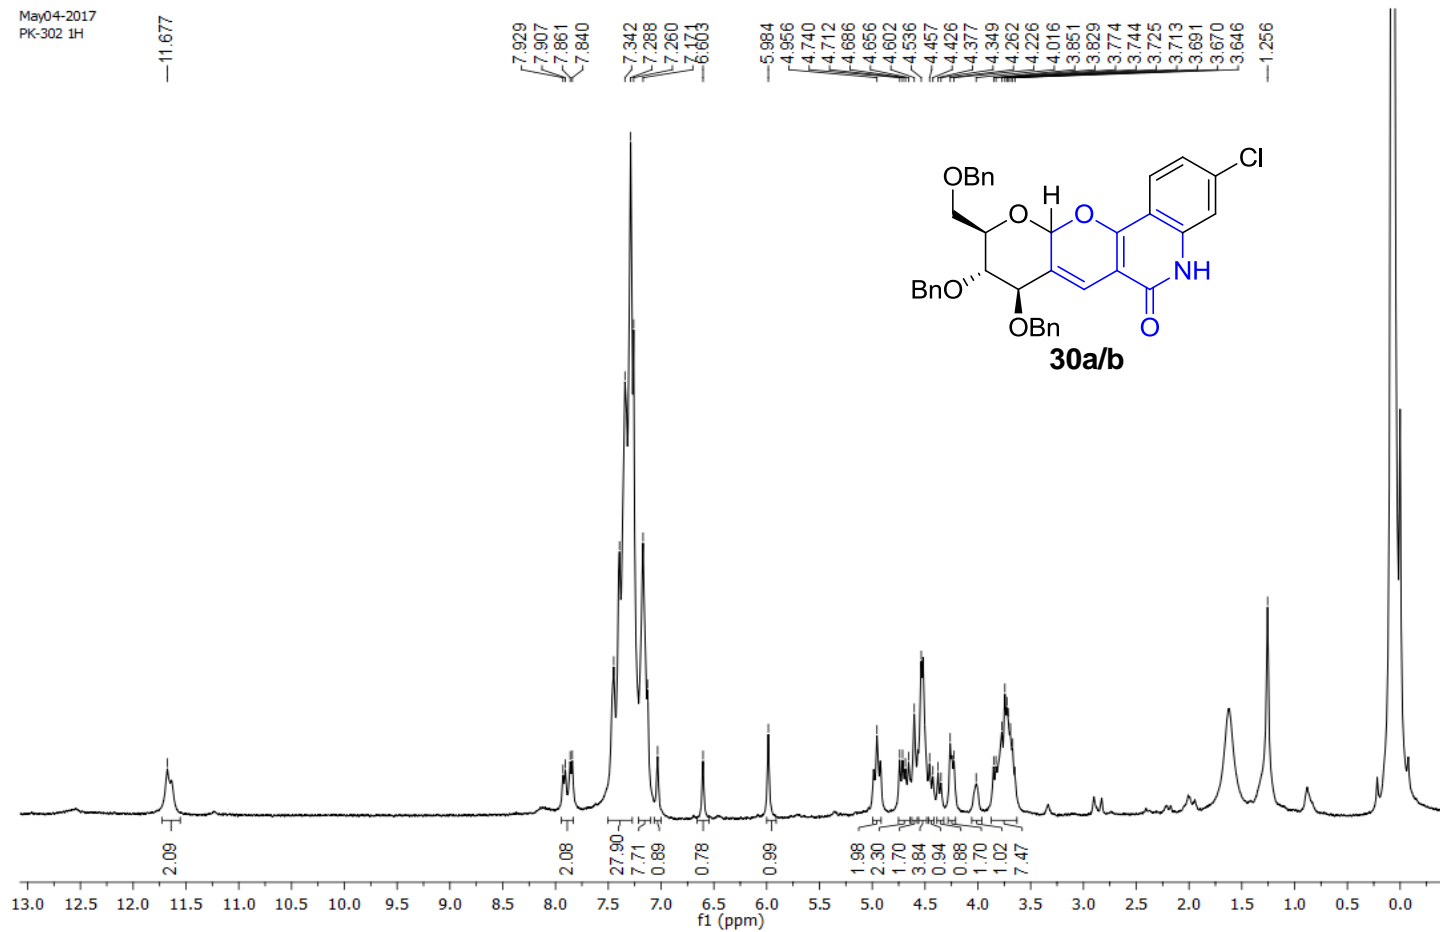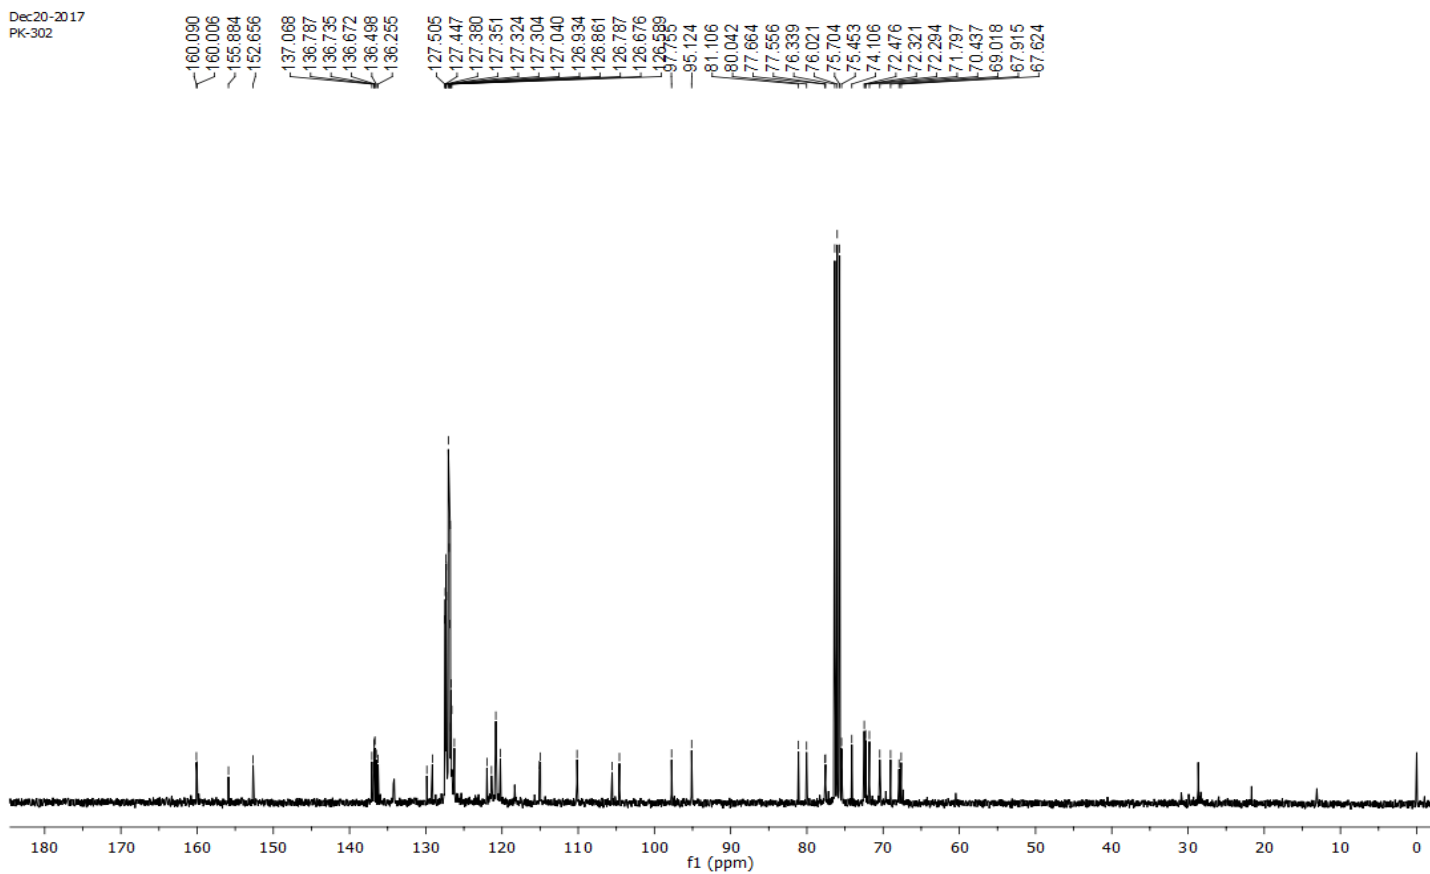

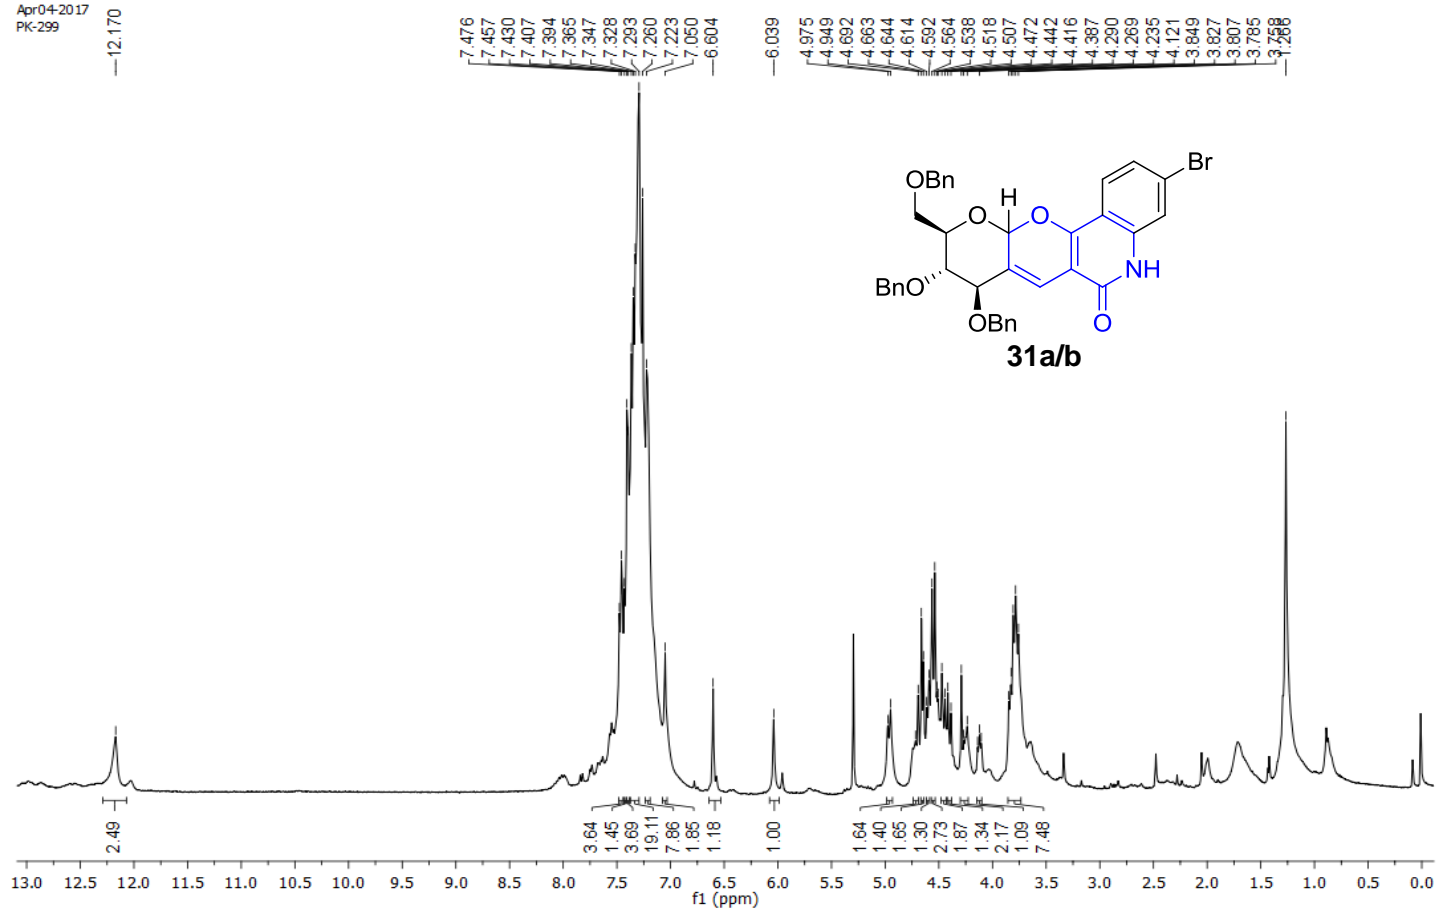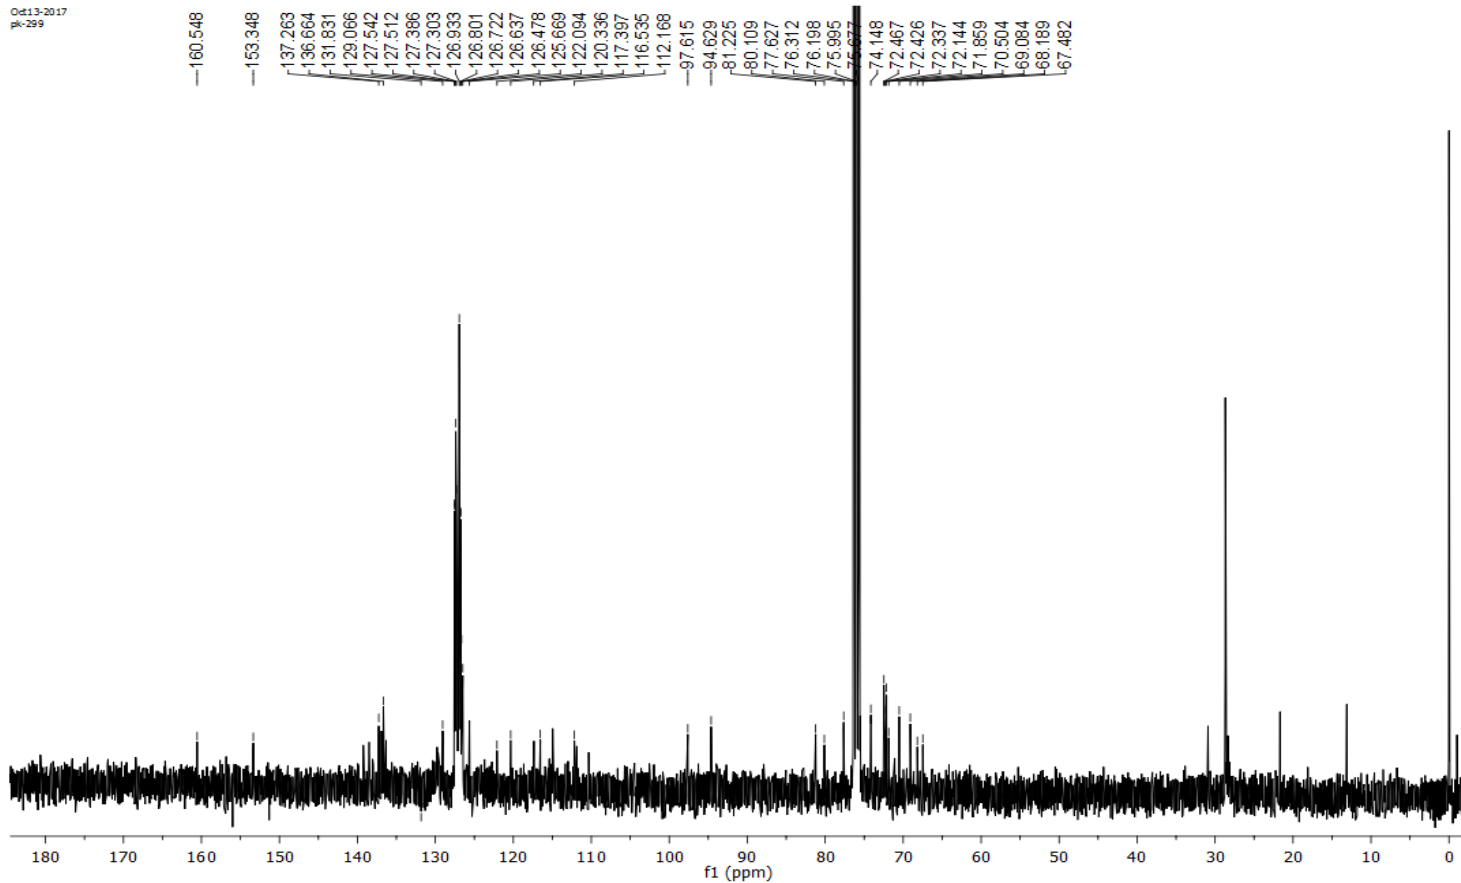

Sep11-2012  
PK-314 1H

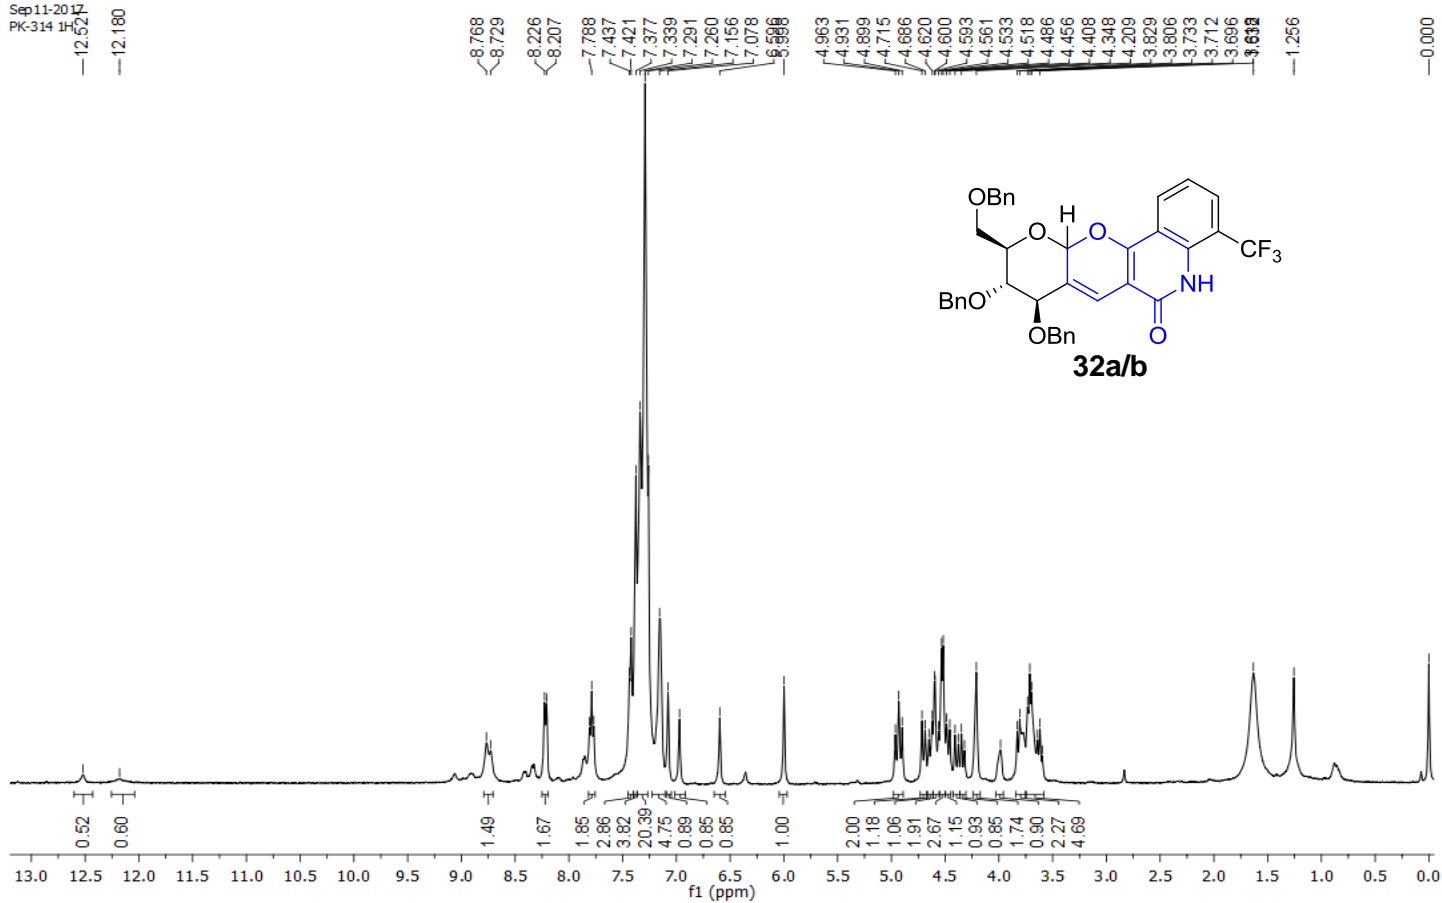

Sep19-2017  
PK-314

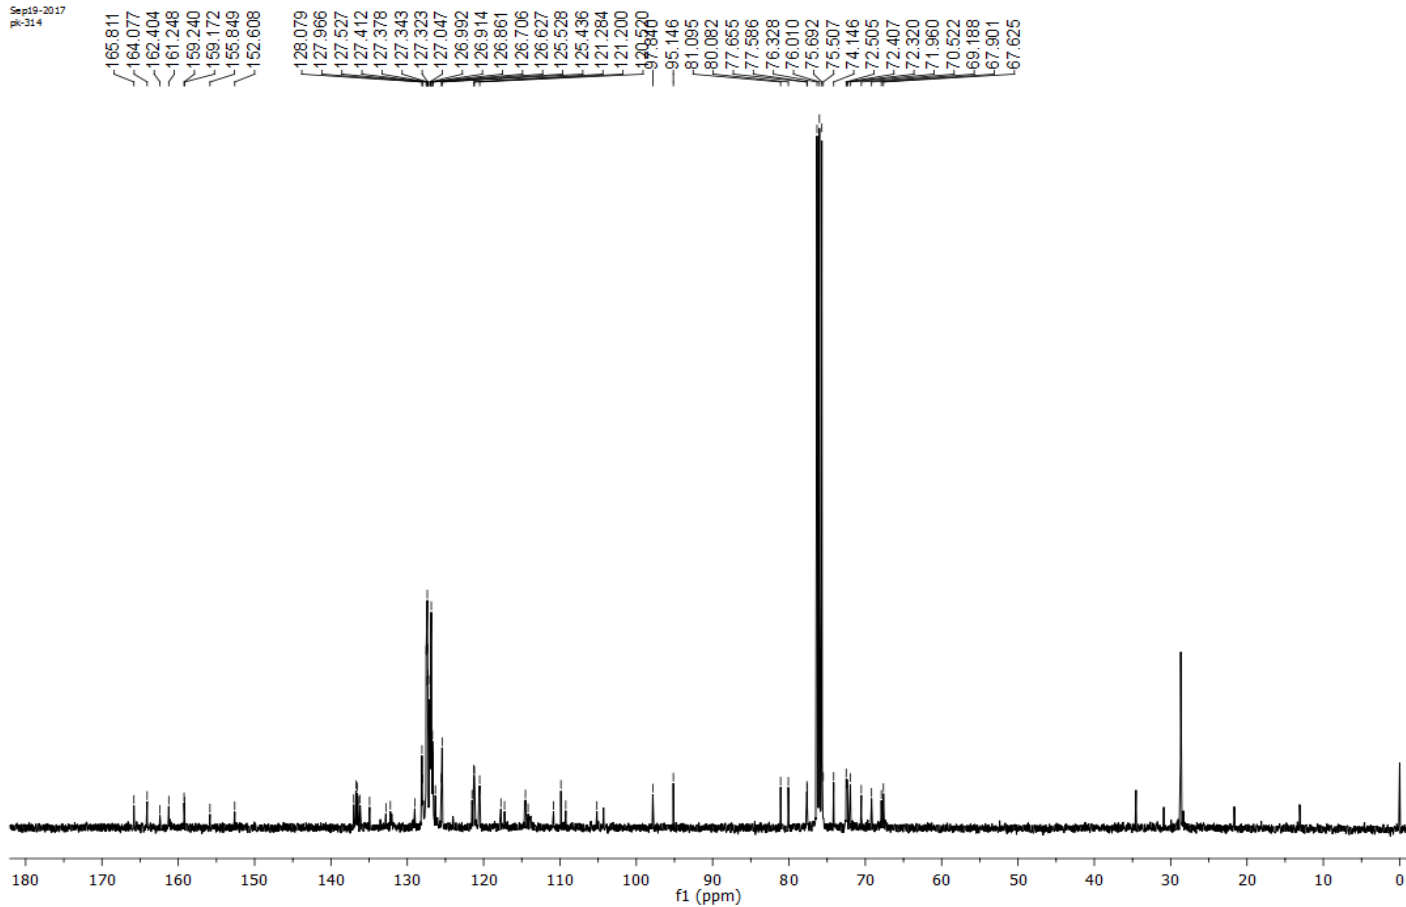

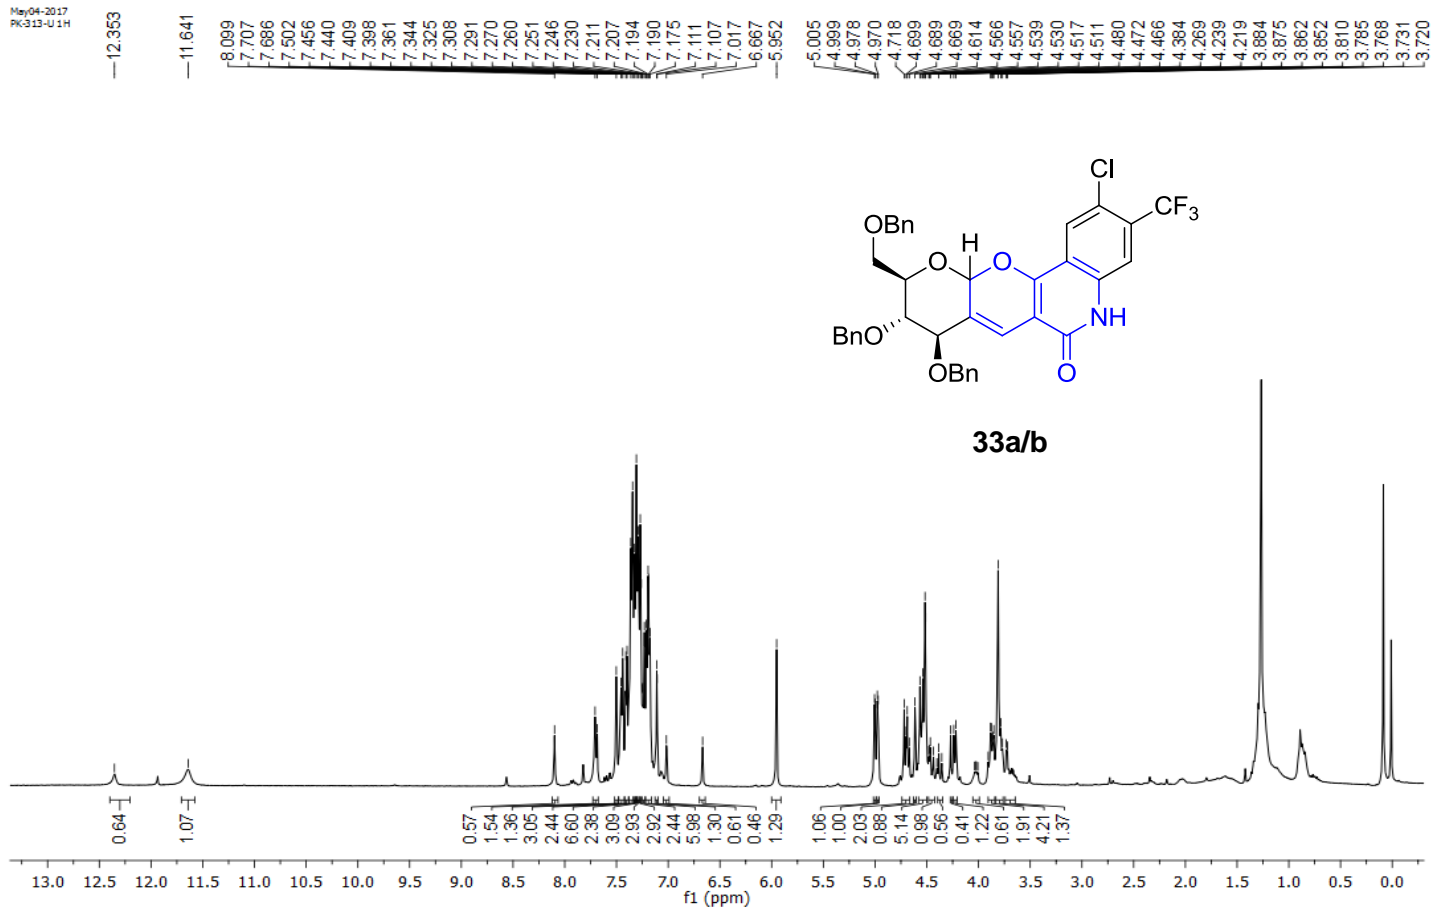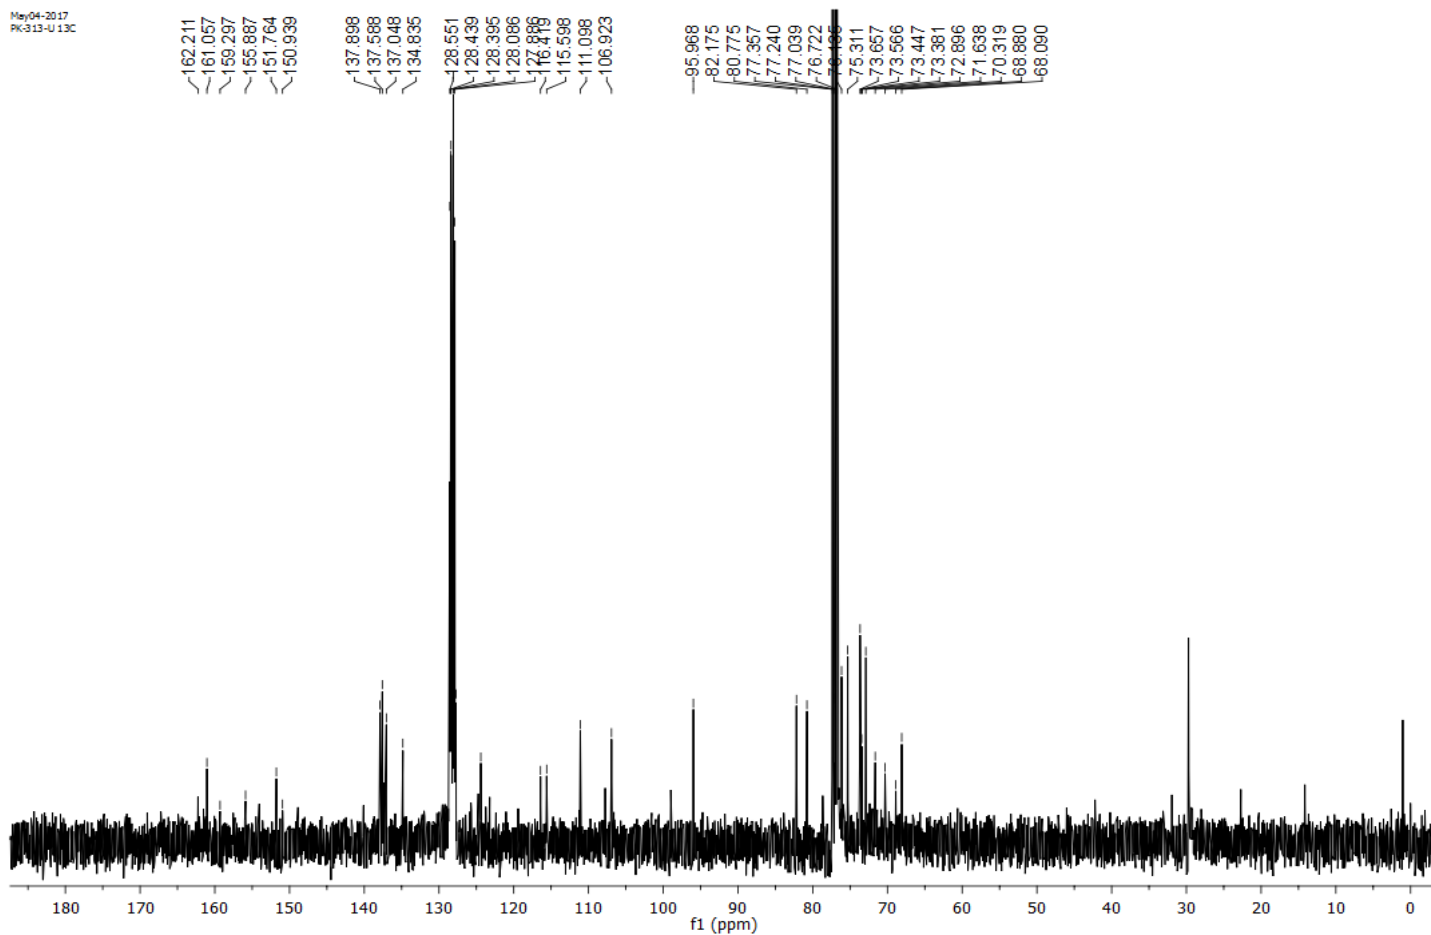

NOE of **12**

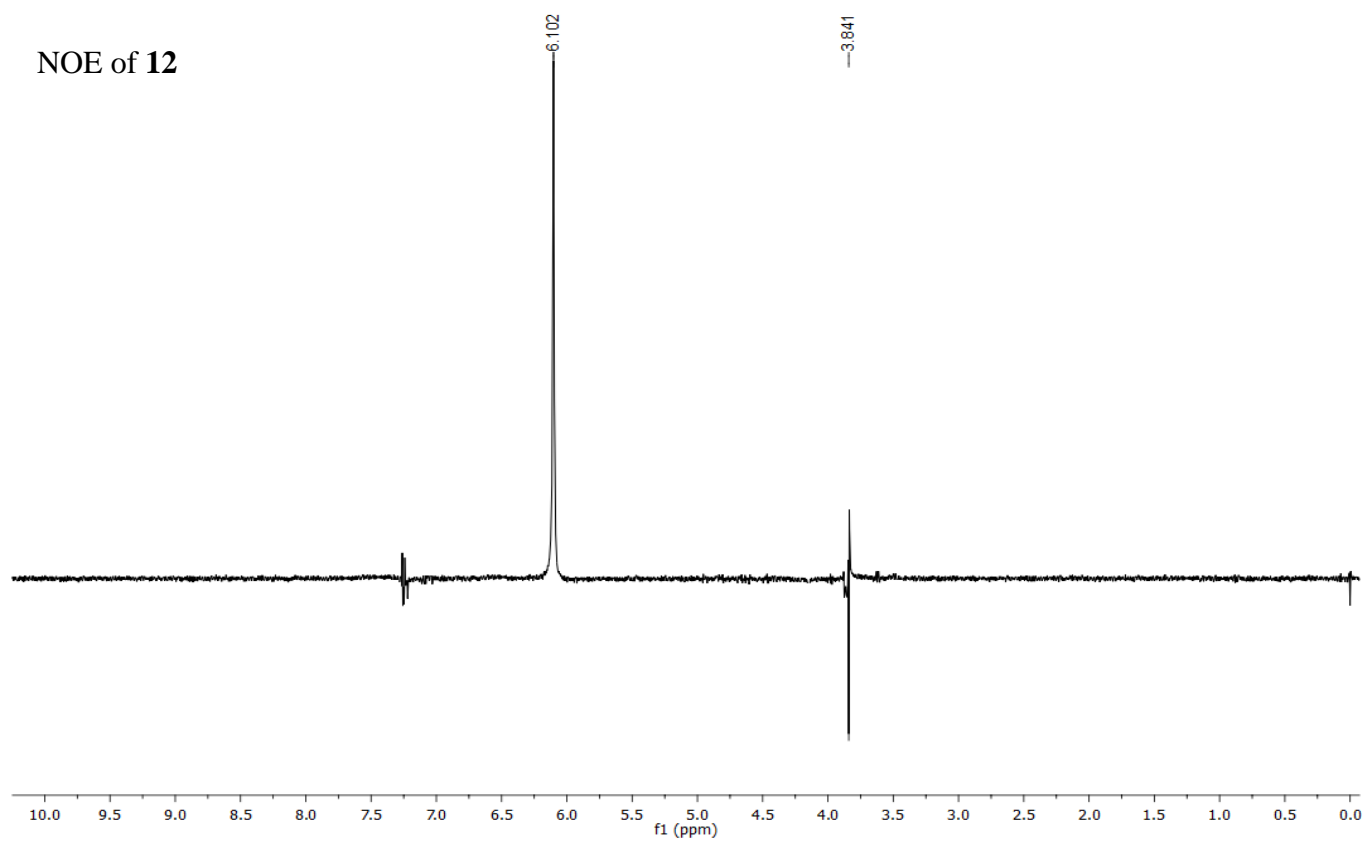

$^1\text{H}$ - $^1\text{H}$  COSY of **12**

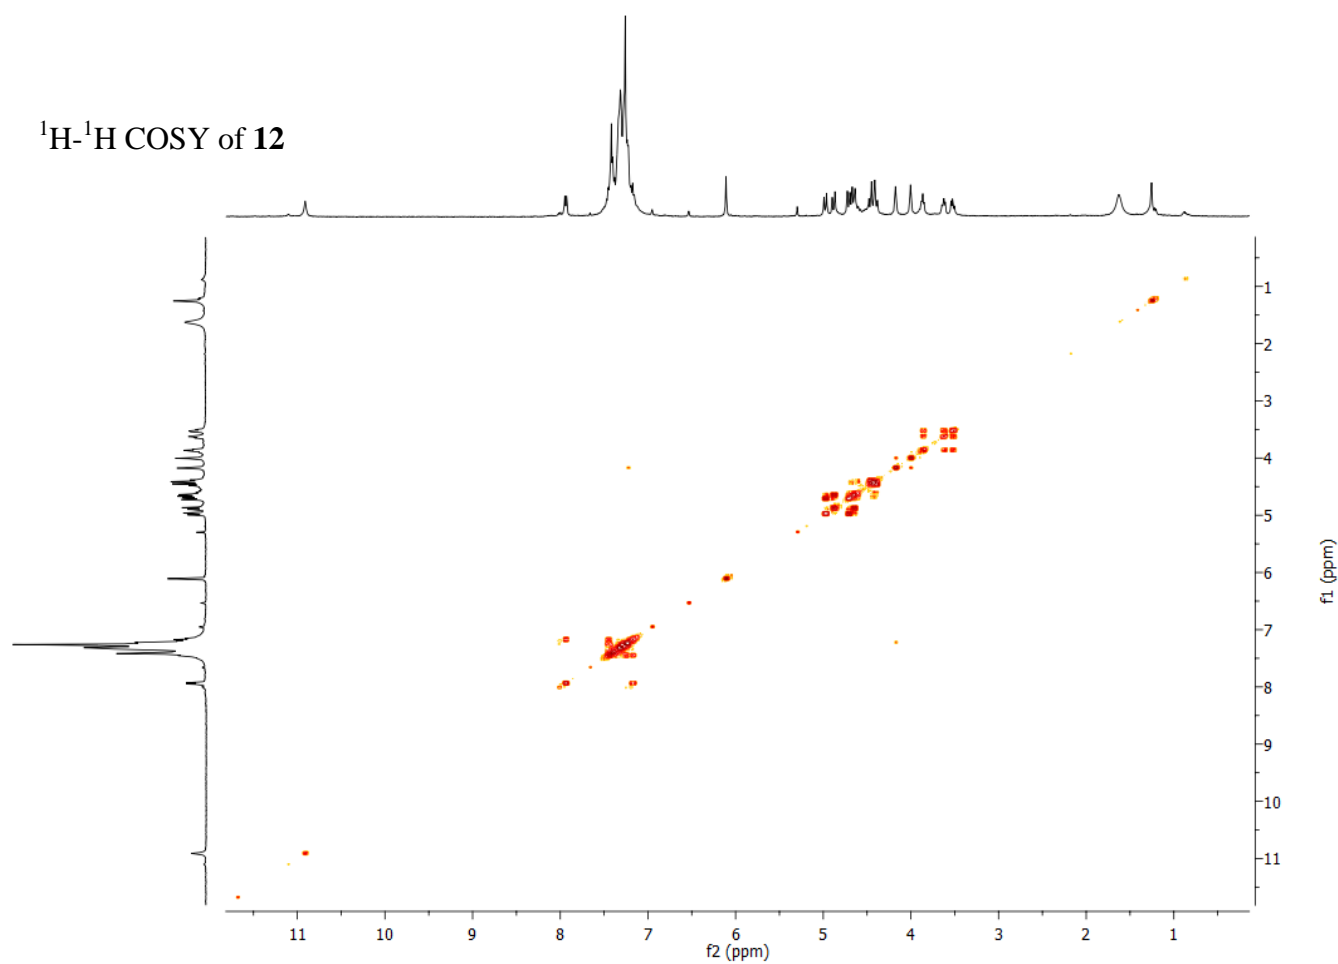

$^1\text{H}$ - $^{13}\text{C}$  HSQC of **12**

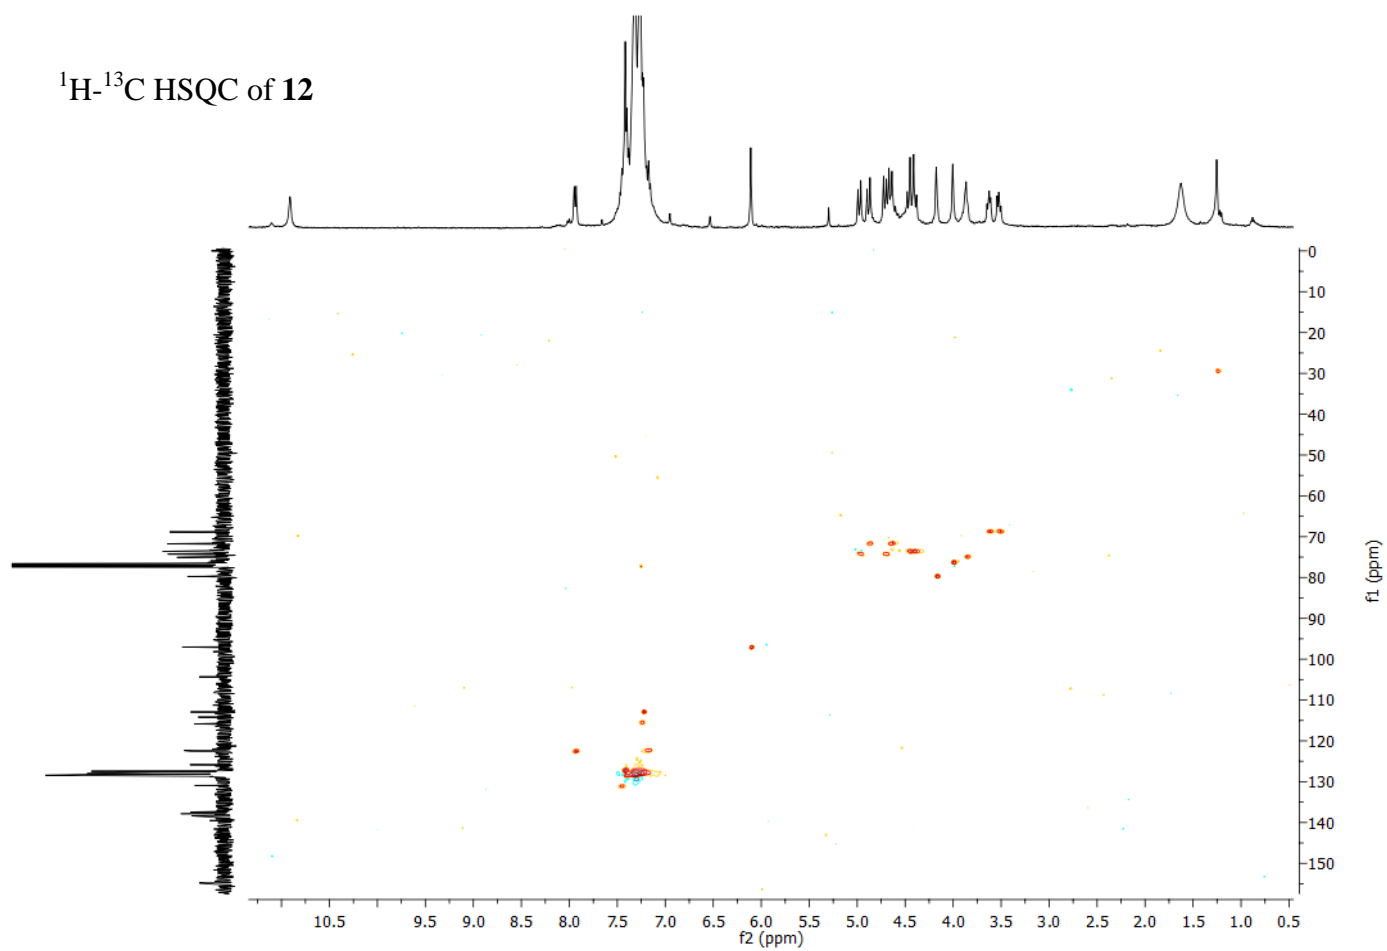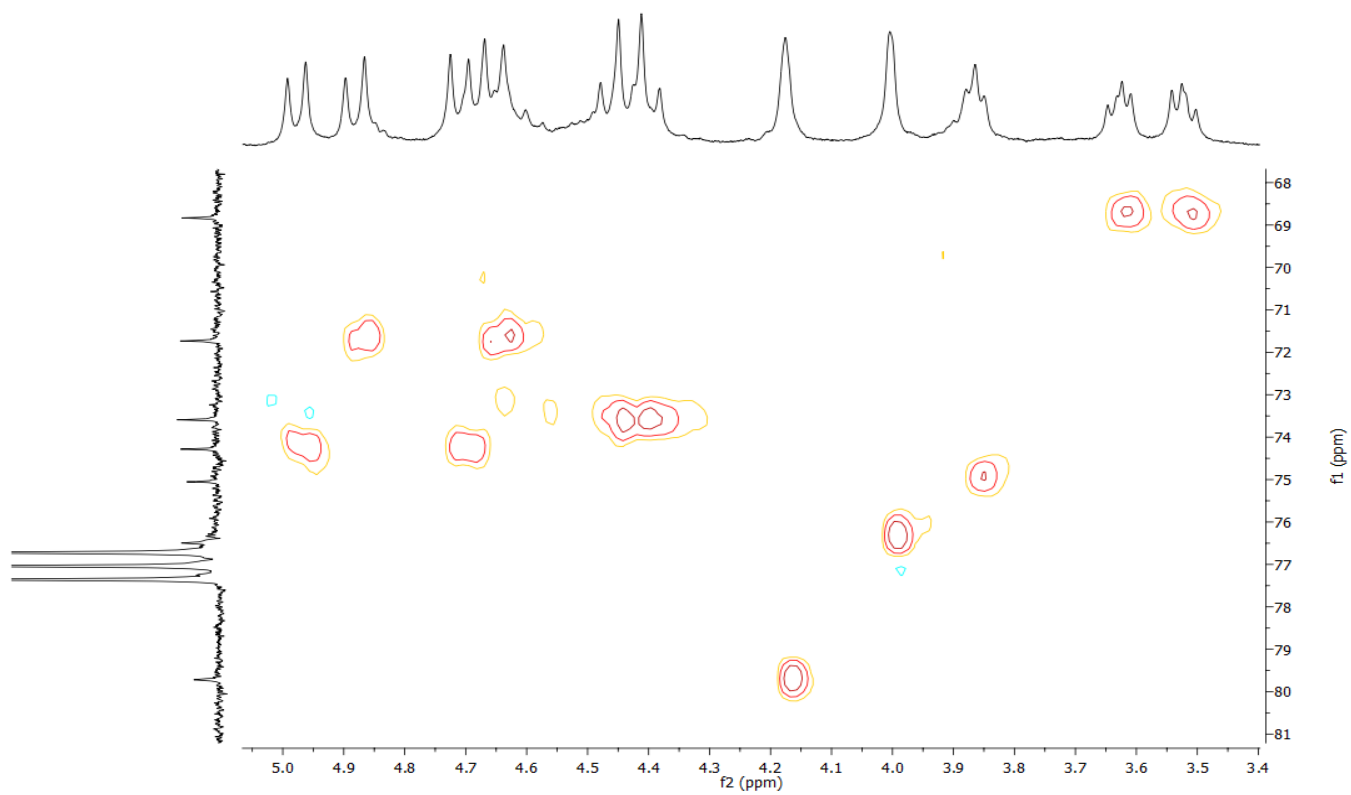

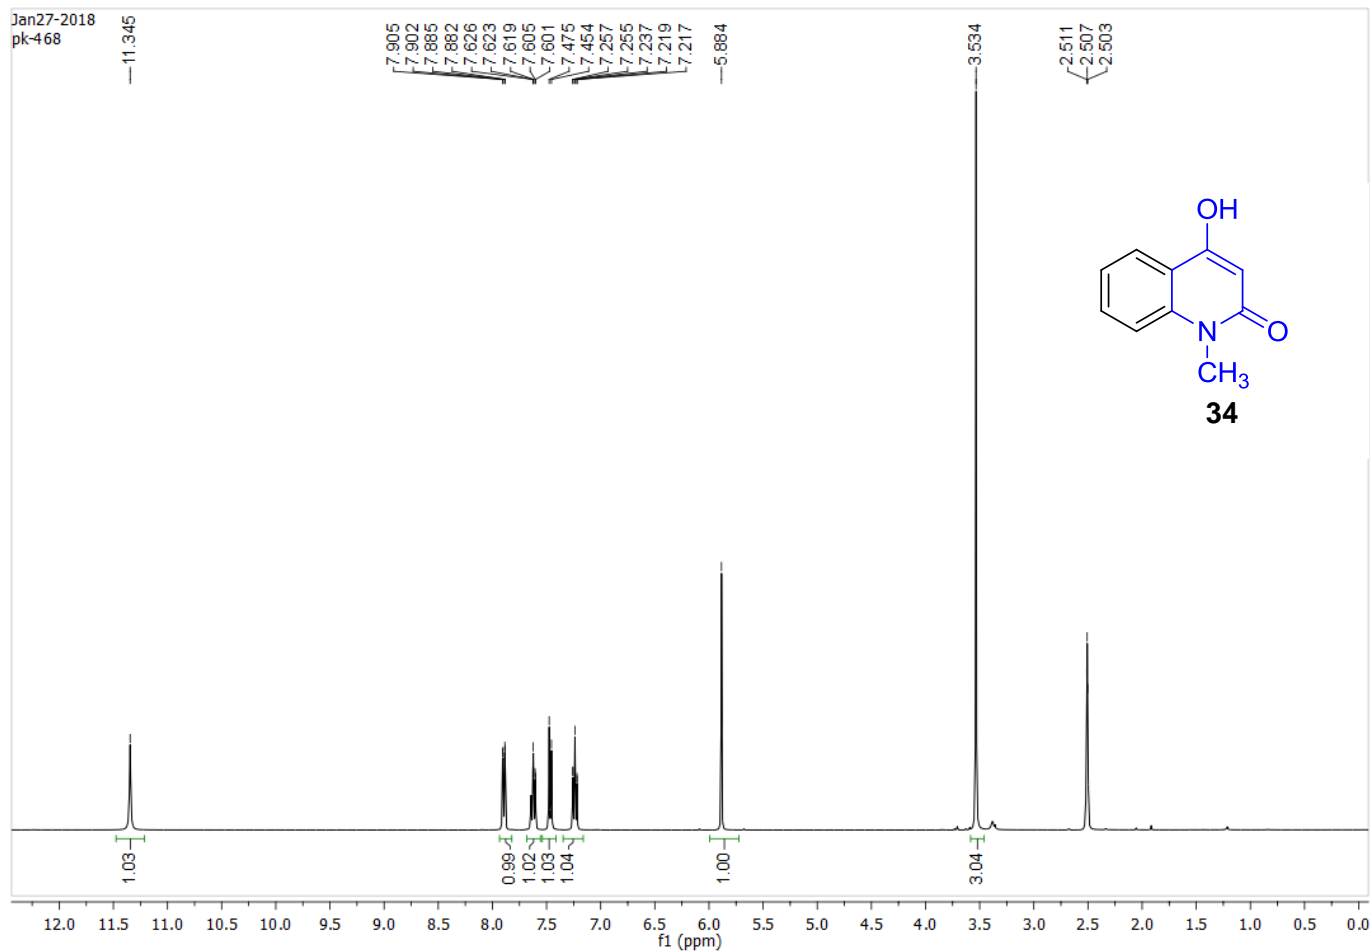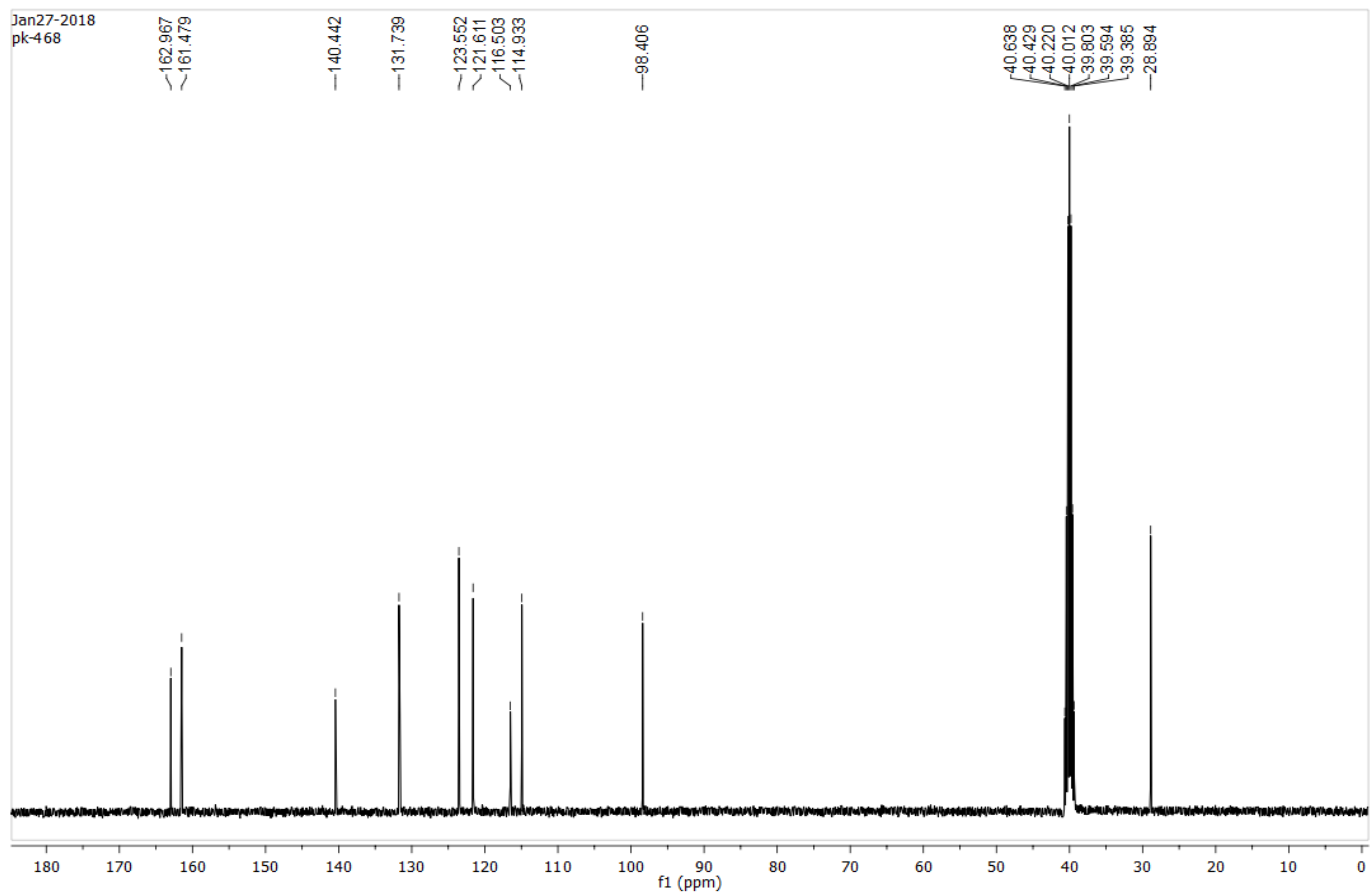

Jan27-2018  
pk-470

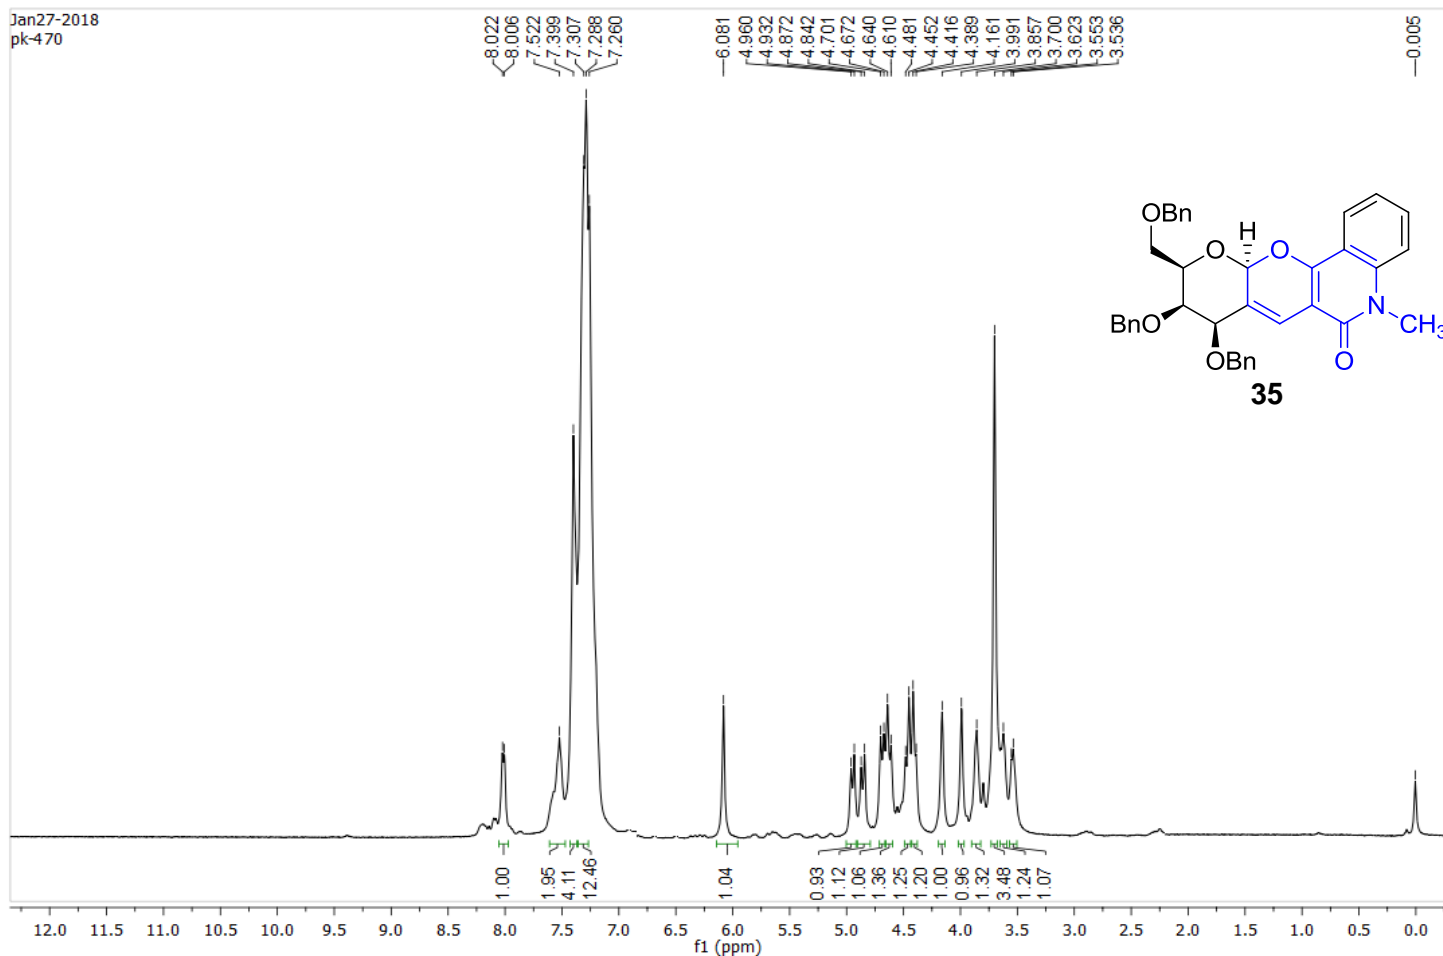

Jan27-2018  
pk-470

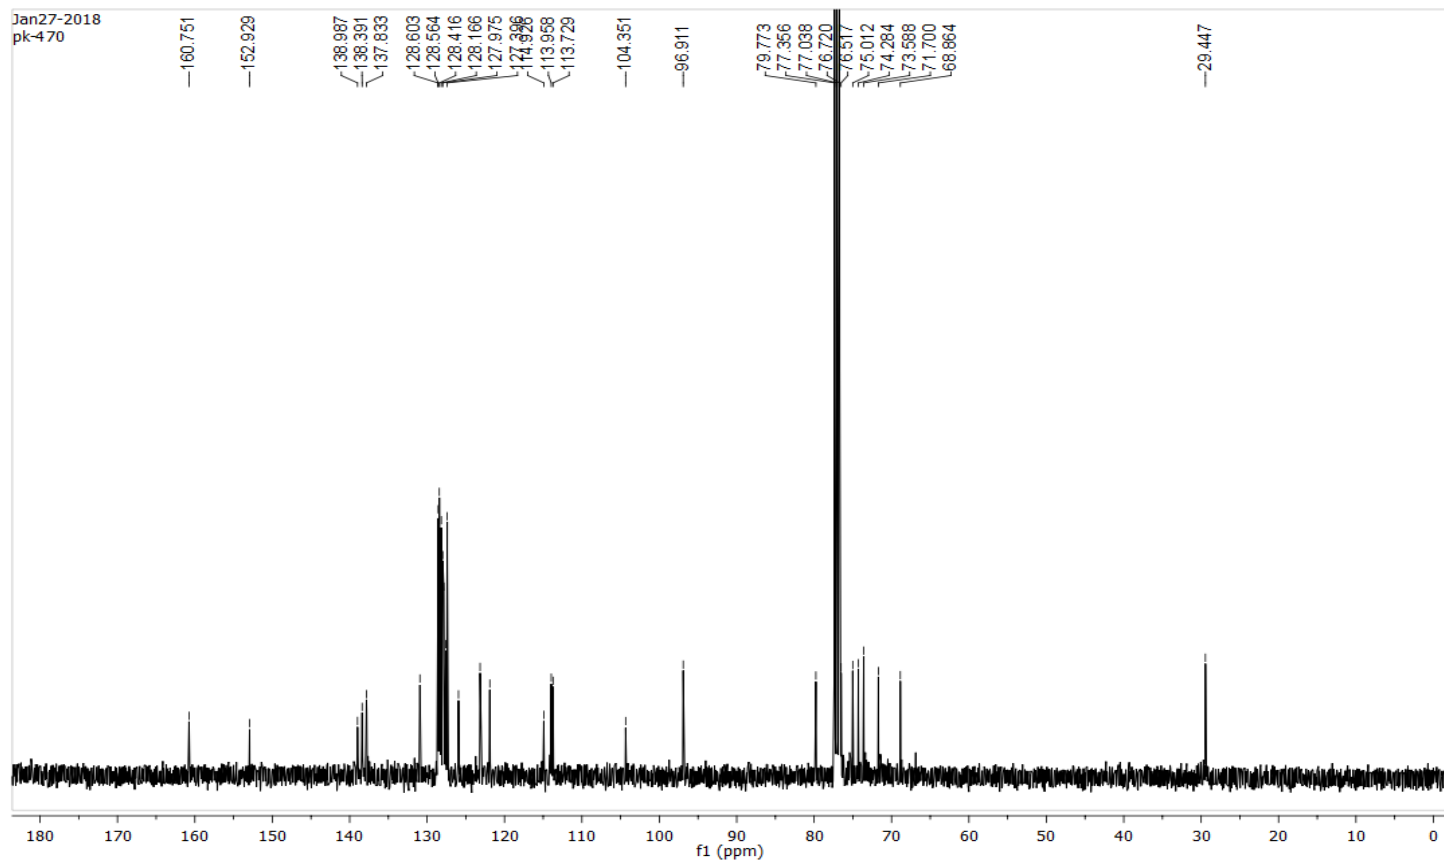



**Results for Cell Viability testing of Compounds 12-22 and 23a/b-33a/b at 25  $\mu$ M concentration in MCF-7 Cell line**

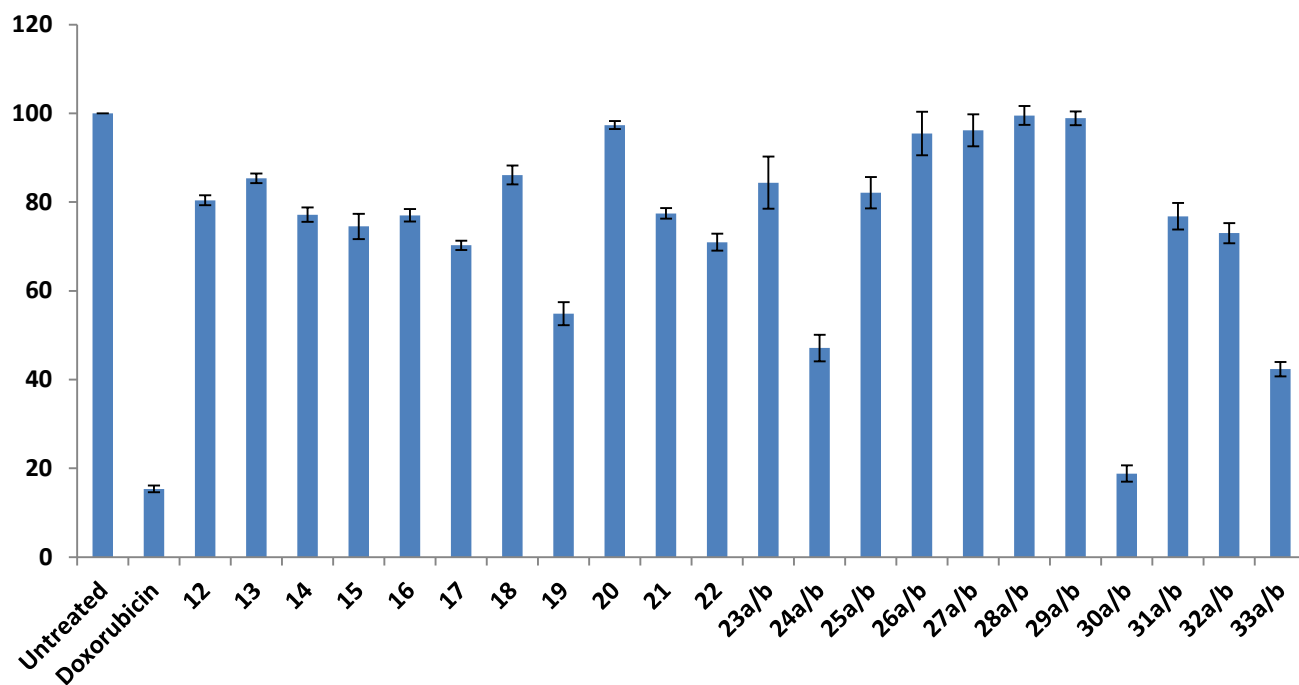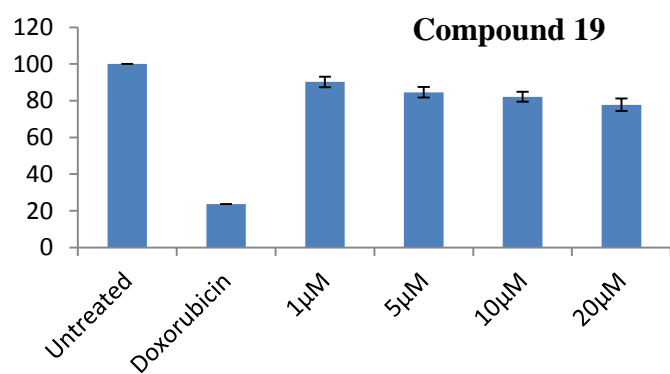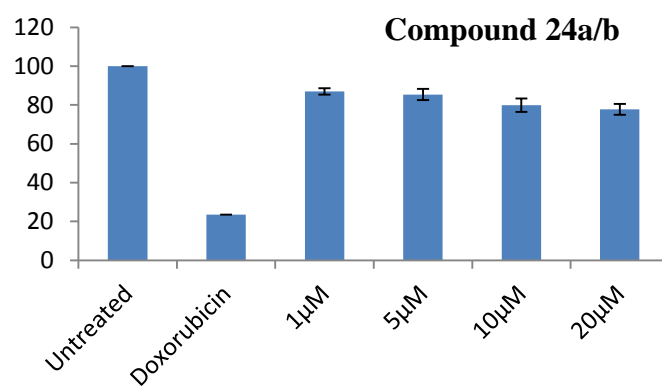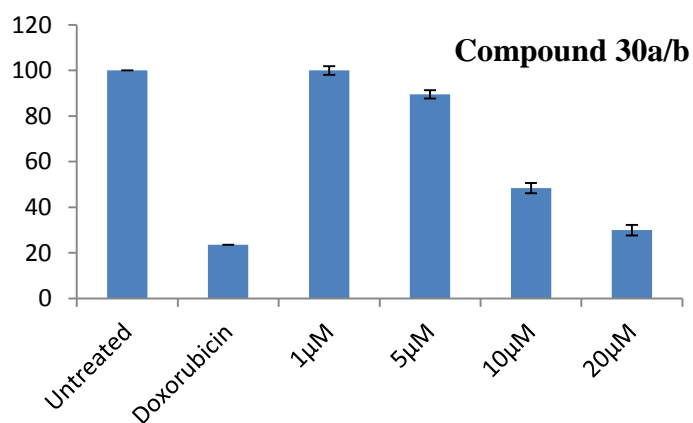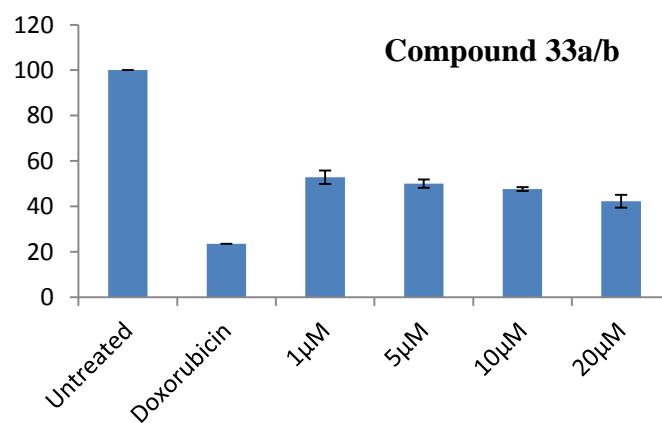

**Results for Cell Viability testing of Compounds 12-22 and 23a/b-33a/b at 25  $\mu$ M concentration in HepG2 Cell line**

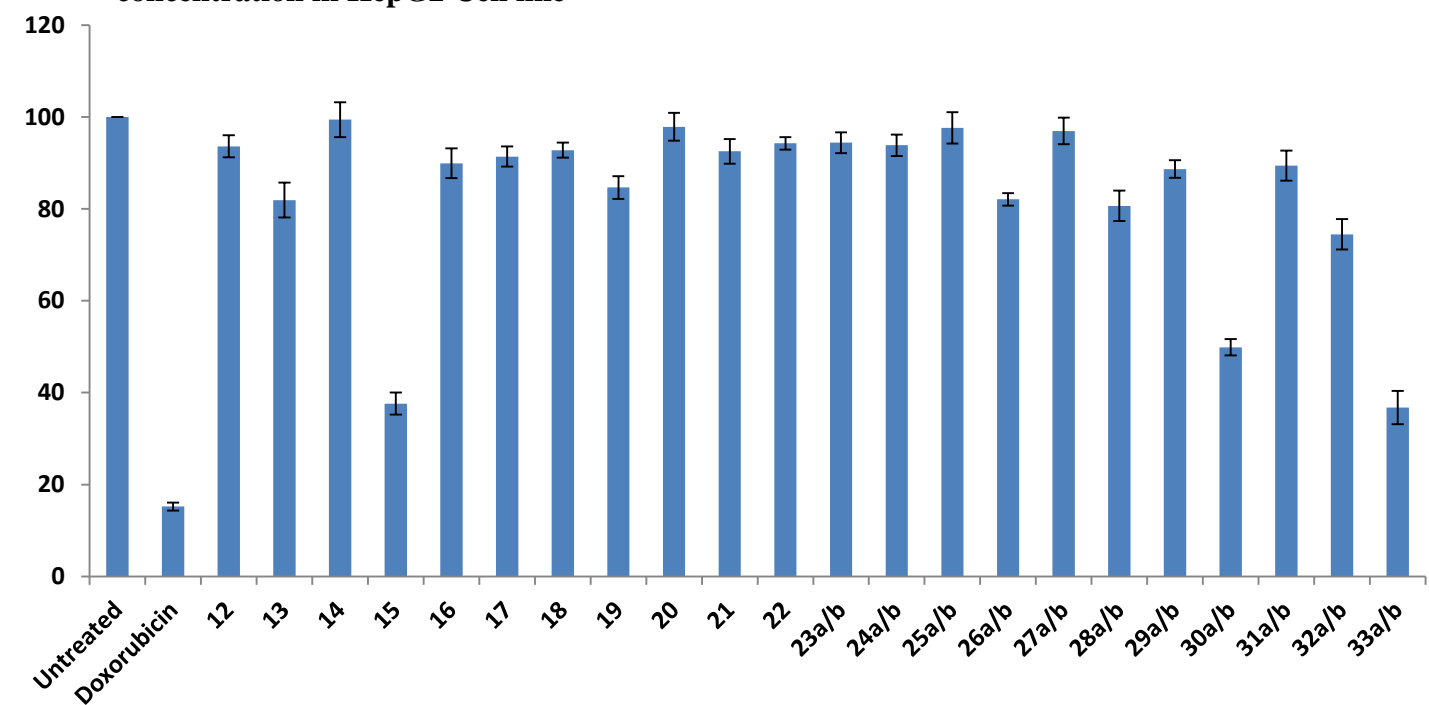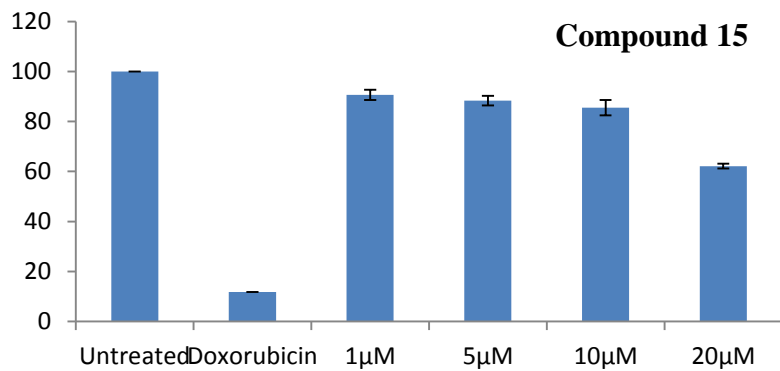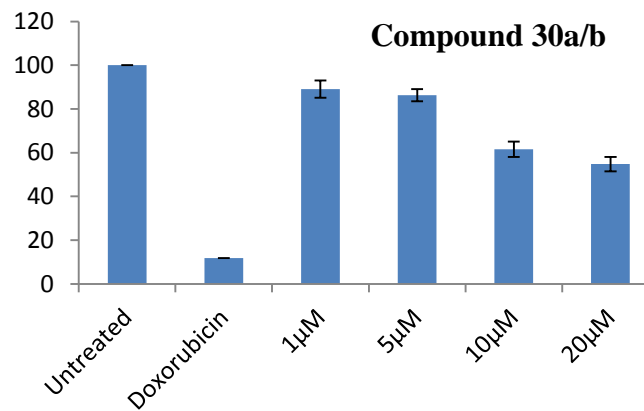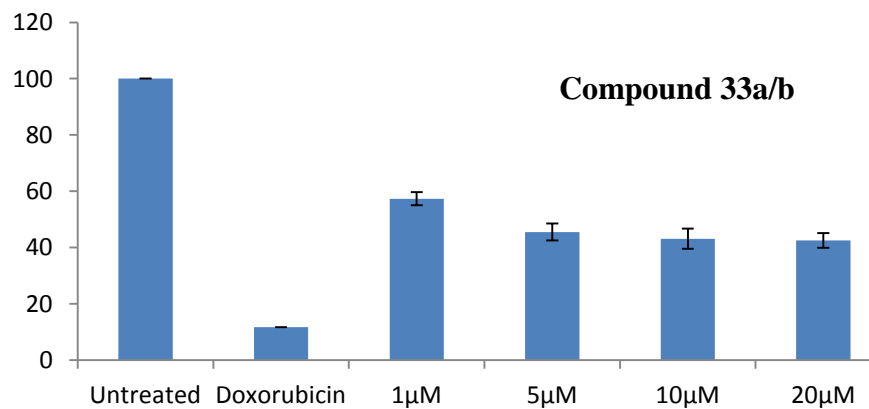

Supplement: c7ob03186f1.pdf [file c7ob03186f1.pdf]
